# Supplementary material
Source: publisher figshare collection journal article supplement (https://brill.figshare.com/articles/dataset/_/28549067)
Supplement: Supplementary file 1 [file 1]

## Sheet: Sheet1
Sex	Wt.(gm)	TL (cm)	CL (cm)
M	8.6	11	2.7
M	10.4	11.3	2.2
M	6.2	9	2
M	5.5	8.6	2
M	8.5	10.4	2.3
M	11.2	11	2.2
M	16.5	13.6	2.9
M	8.4	10.9	2.3
M	10	11	2.1
M	6	8.9	2
M	5.4	8.5	1.8
M	8.5	10.4	2.3
M	12	11.6	2.8
M	3.6	7.4	1.1
M	4.9	8.2	1.5
M	6.4	9.8	1.9
M	4.7	8.2	1.5
M	8.5	10.4	2.3
M	9.7	11.2	2.2
M	14.6	12.7	2.7
M	34	16.2	3.9
M	60	17.5	4.8
M	9.1	10.2	2.5
M	6.2	9	1.9
M	10.8	11.5	2.2
M	10	11.1	2.3
M	12.7	12.3	2.3
M	11.5	11.7	2.2
M	8.5	9.9	2.5
M	6.5	9	2.3
M	12.7	12.3	2.3
M	11.5	11.7	2.2
M	9.4	10.9	1.9
M	9	10.2	1.9
M	10.4	11.4	2.3
M	11	11.4	2.1
M	12.4	11.8	2.5
M	6.6	9.1	2.3
M	8.6	10.6	1.9
F	16.2	12.7	2.8
F	13.2	12.2	2.3
F	14	12.6	2.6
F	15.5	13.1	2.8
F	20	14	3.9
F	10.6	11.6	2.5
F	16.2	12.7	2.8
F	19.6	13.6	2.7
F	16.2	13	3
F	10.8	11.5	2.8
F	18.6	13.9	3
F	9.2	10.8	2.7
F	16.2	12.5	2.8
F	13.2	12.2	2.3
F	18.4	13.7	3
F	9.2	10.8	2.7
F	6.65	10	2
F	6.3	10	2.1
F	14.2	12	2.5
F	15.5	13.1	2.8
F	9.6	11.2	2.3
F	10.5	11.7	2.5
F	6.2	9	2.1
F	4.4	8.4	1.7
F	5.5	9	1.8
F	4	8	1.6
F	12.5	11.6	2.2
F	13.2	12.2	2.3
F	19.5	13.6	2.7
M	5.5	8.6	2
M	8.5	10.4	2.3
M	9.7	11.2	2.2
M	15.2	13	2.7
M	34	16.2	3.9
M	60	17.5	4.8
M	9..4	11.4	2.5
M	6.7	9.6	1.9
M	10.8	11.5	2.2
M	5.2	9.5	2.1
M	12.7	12.3	2.3
M	11.5	11.7	2.2
M	8.5	9.9	2.5
M	6.5	9	2.3
M	12.7	12.3	2.3
M	11.5	11.7	2.2
M	9.4	10.9	1.9
M	9.4	10.8	1.9
M	10.4	11.4	2.3
M	11	11.4	2.1
M	6.5	10	2.2
M	6.8	10.6	2.3
M	8.81	10.9	1.9
M	12.3	11.6	2.5
M	8.7	11.1	2.8
M	5.1	8.8	1.7
M	6.5	10	2.2
M	5.5	8.6	2
M	8.5	10.4	2.3
M	12	11.6	2.8
M	16.5	13.6	2.9
M	8.6	11.1	2.3
M	10.8	11.5	2.2
M	6.5	9	2.3
M	5.7	9.6	2
M	8.5	10.4	2.3
M	12	11.6	2.8
M	3.9	8.6	1.3
M	5.2	8.8	1.7
M	6.6	10	2.1
F	6.5	10	1.8
F	14	12.6	2.6
F	15.5	13.1	2.8
F	20	14	3.9
F	10.6	11.6	2.5
F	16.2	12.7	2.8
F	13.2	12.2	2.3
F	10.6	11.4	2.4
F	5.9	8.9	1.6
F	6.5	10	2
F	6.31	10	2.1
F	4.42	8.5	1.7
F	5.5	9	1.8
F	4	8	1.6
F	12.5	11.6	2.2
F	13.2	12.2	2.3
F	19.6	13.6	2.7
F	16.5	13.5	3
F	4.1	8	1.6
F	12.5	11.5	2.2
F	11.4	12.1	2.5
F	9.9	11.2	2.3
M	12.3	11.6	2.5
M	8.72	11.1	2.8
M	10.85	11.5	2.2
M	6.53	10	2.2
M	5.5	8.6	2
M	8.5	10.4	2.3
M	12	11.6	2.8
M	16.5	13.6	2.9
M	8.62	11.1	2.3
M	10.27	11.2	2.4
M	6.5	9	2.3
M	5.73	9.6	2
M	8.5	10.4	2.3
M	12	11.6	2.8
M	3.95	8.6	1.3
M	5.12	8.8	1.7
M	6.61	10	2.1
M	5.15	9.5	2.1
M	6.53	10	2.2
M	5.15	8.8	1.7
M	15.61	13.7	3
M	10.8	11.5	2.2
F	6.5	10	1.8
F	14	12.6	2.6
F	15.5	13.1	2.8
F	20	14	3.9
F	10.6	11.6	2.5
F	16.2	12.7	2.8
F	13.2	12.2	2.3
F	10.6	11.4	2.4
F	5.92	8.9	1.6
F	6.57	10	2
F	6.31	10	2.1
F	4.42	8.5	1.7
F	5.45	9	1.8
F	3.96	8	1.6
F	12.52	11.6	2.2
F	13.2	12.2	2.3
F	19.6	13.6	2.7
F	16.5	13.5	3
F	4.1	8	1.6
F	12.5	11.5	2.2
F	11.42	12.1	2.5
F	9.9	11.2	2.3
M	6.56	9.8	1.8
M	8.62	11.1	2.5
M	8.72	11.1	2.8
M	10.85	11.5	2.2
M	9.7	11.2	2.2
M	15.2	13	2.7
M	5.15	8.8	1.7
M	15.61	13.7	3
M	10.8	11.5	2.2
M	10.32	11.4	2.3
M	11	11.4	2.1
M	4	7.7	1.6
M	4.32	7.6	1.5
M	9.6	11.5	2
M	12.7	12.3	2.3
M	11.5	11.7	2.2
M	10.7	11.5	2.2
M	8.75	11	2.1
M	7.2	10.3	2.3
M	15.45	13	2.7
M	14.75	13.5	2.7
M	5.77	9.7	2
M	14.52	13.2	2.5
M	8.84	11.3	2.4
F	14	12.4	2.6
F	14.8	13.1	2.7
F	6.4	10.6	2.4
F	14	12.6	2.6
F	15.5	13.1	2.8
F	20	14	3.9
F	10.6	11.6	2.5
F	16.2	12.7	2.8
F	13.2	12.2	2.3
F	10.6	11.4	2.4
F	5.92	8.9	1.6
F	6.57	10	2
F	6.31	10	2.1
F	4.42	8.5	1.7
F	5.45	9	1.8
F	3.96	8	1.6
F	12.52	11.6	2.2
F	23.5	15.2	3.3
F	12.6	11.5	2.1
F	22	15	3.3
F	14.2	12	2.5
F	15.5	13.1	2.8
F	20.5	14.1	3.9
F	10.4	11.5	2.5
F	8.4	10.9	2.4
F	9.6	11.2	2.3
F	10.5	11.7	2.5
F	7	10.2	2.3
F	12.7	13	2.6
F	17	13.9	3
F	8.4	10.9	2.4
F	9.44	11.2	2.5
F	12.13	11.7	2.7
F	12.42	12.2	2.4
F	5.68	9.2	2.3
F	8.4	10.9	2.4
F	11.38	12	2.5
F	13.2	12.9	2.7
F	12.1	12.7	3
F	6.45	10.6	2.4
F	9.4	12	2.9
F	9.9	11.2	2.3
F	10.5	11.7	2.5
F	7	10.2	2.3
F	6.3	10	2
F	7.9	10.6	2.4
F	3.75	8.1	1.2
F	8.4	10.9	2.4
F	9.6	11.2	2.3
F	10.5	11.7	2.5
F	7	10.2	2.3
F	8.15	10.7	2.9
F	17	13.9	3
F	8.4	10.9	2.4
F	9.6	11.2	2.3
F	10.5	11.7	2.5
F	7	10.2	2.3
F	8.15	10.7	2.9
M	6.65	10	2.1
M	5.15	9.5	2.1
M	6.5	10	2.2
M	5.7	9.6	2
M	7.1	10.5	2.3
M	4.65	9.2	2.1
M	4.4	9.1	2.1
M	11.65	12.2	2.4
M	8.65	11	2.3
M	5.15	9.5	2.1
M	5.5	8.6	2
M	4.72	9	1.2
M	8.65	11.4	2.6
M	21.5	15.4	3
M	4.72	9	1.2
M	3.95	8.6	1.3
M	3.95	8.6	1.3
M	16.45	13.6	3.3
M	9.95	12	3
M	5.45	9.6	2.3
M	7.1	10.7	2.3
M	4.85	9.6	2.1
M	5.23	9.4	2.1
M	2.43	7.3	1.5
M	10.3	11.4	2.3
M	4.85	9.6	2.1
M	5.32	9.4	2.1
M	11.88	12.3	3.2
M	14.53	13.6	3
M	13.74	13.1	2.7
M	20.03	14.7	3.1
M	3.95	8.6	1.3
M	16.45	13.6	3.3
M	9.95	12	3
M	5.45	9.6	2.3
M	13.95	13.6	2.9
M	9.15	11.2	2.3
M	10.5	12	2.6
M	11.6	12.3	2.4
M	7.22	10.9	2.4
M	7.1	10.5	2.3
M	2.4	7.3	1.5
M	5.3	9.2	2.1
M	5.15	9.5	2.1
M	11.92	12.3	3.2
M	14.5	13.6	3
M	13.74	13.1	2.7
M	20	14.7	3.1
M	11.6	12.4	2.7
M	12.4	13.3	3
M	21.5	15.4	3
M	4.72	9	1.2
M	6.61	10	2.1
M	5.15	9.5	2.1
M	6.53	10	2.2
M	5.73	9.6	2
M	7.1	10.7	2.3
M	4.85	9.6	2.1
M	5.32	9.4	2.1
M	2.4	7.3	1.5
M	5.3	9.2	2.1
M	5.15	9.5	2.1
M	6.53	10	2.2
M	5.76	9.5	2
M	5.8	9.9	2.2
M	4.5	9.3	2.1
F	15.4	13.6	2.7
F	18.83	14.5	3
F	12.83	13.3	2.9
F	11.42	12	2.5
F	9.6	11.2	2.3
F	10.5	11.7	2.5
F	12.7	13	2.8
F	4.78	9.6	2.1
F	10.15	11.8	2.5
F	5.26	9.3	2
F	7.1	10.5	2.5
F	7.31	10.4	2.2
F	8	10.7	2.2
F	6.5	9.9	2.1
F	6.35	9.7	2.1
F	12.9	13.1	2.7
F	4.75	9.4	2
F	6.3	10	2
F	7.9	10.6	2.4
F	3.75	8.1	1.2
F	8.4	10.9	2.4
F	11.5	12	2.5
F	9.6	11.2	2.3
F	10.5	11.7	2.5
F	7	10.2	2.3
F	8.15	10.7	2.9
F	6.57	10	2
F	6.31	10	2.1
F	4.42	8.5	1.7
F	5.45	9	1.8
F	3.96	8	1.6
F	12.52	11.6	2.2
F	14	12.6	2.6
F	15.5	13.1	2.8
F	20	14	3.9
F	10.6	11.6	2.5
F	15.8	12.7	2.8
F	19.6	13.6	2.7
F	18.6	13.9	3
F	13	13.2	2.9
F	4.56	9.6	2.1
F	10.3	11.9	2.5
F	5.1	9.3	2
F	7.1	10.5	2.5
F	7.31	10.4	2.2
F	8	10.7	2.2
F	14	12.6	2.6
F	15.5	13.1	2.8
F	20	14	3.9
F	10.6	11.6	2.5
F	16.2	12.7	2.8
F	13.2	12.2	2.3
F	10.6	11.4	2.4
F	5.92	8.9	1.6
M	5.5	8.6	2
M	8.5	10.4	2.3
M	12	11.6	2.8
M	14.5	12.2	3.1
M	6.5	9.6	2.2
M	10.6	11.5	2
M	9	11	2.2
M	12.92	12.1	2.6
M	6.47	9.9	2.2
M	6.56	9.8	1.8
M	8.62	11.1	2.5
M	8.72	11.1	2.8
M	10.85	11.5	2.2
M	3.95	7.6	1.6
M	4.3	7.8	1.6
M	9.06	11	2.2
M	8.32	10.8	1.9
M	6.75	10.6	2.3
M	8.81	10.9	1.9
M	8.08	10.3	1.8
M	8.58	11.4	2.6
M	5.3	9.2	2.1
M	6.61	10	2.1
M	5.15	9.5	2.1
M	6.53	10	2.2
M	5.73	9.6	2
M	8.9	11	1.9
M	8	10.2	1.8
M	9.1	10.9	1.9
M	9.4	11.4	2.5
M	6.65	9.6	1.9
M	10.35	11.3	2.1
M	10.9	11.9	2
M	8	11.1	1.9
M	11.65	11.7	2.2
M	8.1	10.6	1.9
M	15.65	13.7	3
M	9.7	11.2	2.5
M	10.3	11.4	2.3
M	11	11.4	2.1
M	10.2	11.2	2.2
M	7.62	10.4	1.9
M	9.6	11.5	2
M	10.85	11.5	2.2
M	5.12	8.8	1.7
M	7.2	10.3	2.3
M	5.65	9.1	1.7
M	7.2	10.2	2.2
M	5.65	9	1.7
M	7.7	10.5	2
M	7.8	10.4	2
M	5.5	9	1.7
M	3.95	7.6	1.6
M	4.3	7.8	1.6
M	9.06	11	2.2
M	8.32	10.8	1.9
M	6.75	10.6	2.3
M	8.81	10.9	1.9
M	8.08	10.3	1.8
M	9.4	10.9	1.9
M	9.35	11.4	2.5
M	6.65	9.6	1.9
F	13.25	12.2	2.3
F	13.35	12.4	2.7
F	16.5	13.5	3
F	10.8	11.5	2.8
F	11.8	11.9	2.6
F	10.6	11.4	2.4
F	5.92	8.9	1.6
F	6.57	10	2
F	6.31	10	2.1
F	4.42	8.5	1.7
F	5.45	9	1.8
F	3.96	8	1.6
F	12.52	11.6	2.2
F	8.82	10.5	2.1
F	14	12.6	2.6
F	15.5	13.1	2.8
F	20	14	3.9
F	10.6	11.6	2.5
F	15.8	12.7	2.8
F	19.6	13.6	2.7
F	18.6	13.9	3
F	14.5	12.7	2.7
F	9.54	11.2	2
F	10.64	11.6	2.6
F	9.2	10.8	2.7
M	8.5	10.4	2.3
M	12	11.6	2.8
M	16.6	13.7	2.9
M	8.6	10.6	2.3
M	60	17.5	4.8
M	9..4	11.4	2.5
M	6.7	9.6	1.9
M	10.8	11.5	2.2
M	5.2	9.5	2.1
M	12.7	12.3	2.3
M	11.5	11.7	2.2
M	8.5	9.9	2.5
M	6.8	9.1	2.3
M	12.7	12.3	2.3
M	11.5	11.7	2.2
M	9.6	11.1	1.9
M	9.4	10.8	1.9
M	10.4	11.4	2.3
M	11	11.4	2.1
M	6.6	10.1	2.2
M	6.8	10.6	2.3
M	6.5	10	2.2
M	12.3	11.6	2.5
M	8.4	10.8	2.8
M	4.9	8.4	1.7
F	6.5	10	2
F	6.31	10	2.1
F	4.42	8.5	1.7
F	5.5	9	1.8
F	4	8	1.6
F	12.5	11.6	2.2
F	13.2	12.2	2.3
F	19.6	13.6	2.7
F	16.5	13.5	3
F	4.1	8	1.6
F	12.5	11.5	2.2
F	11.4	12.1	2.5
F	9.9	11.2	2.3
F	5.9	8.9	1.6
F	6.5	10	1.8
F	14	12.6	2.6
F	15.5	13.1	2.8
F	20	14	3.9
F	10.6	11.6	2.5
F	16.2	12.7	2.8
F	13.2	12.2	2.3
F	10.6	11.4	2.4
M	9.7	11.2	2.2
M	15.2	13	2.7
M	5.15	8.8	1.7
M	15.61	13.7	3
M	10.8	11.5	2.2
M	10.32	11.4	2.3
M	11	11.4	2.1
M	4	7.7	1.6
M	4.32	7.6	1.5
M	9.6	11.5	2
M	12.7	12.3	2.3
M	11.5	11.7	2.2
M	10.7	11.5	2.2
M	8.75	11	2.1
M	7.2	10.3	2.3
M	16.5	13.6	2.9
M	8.62	11.1	2.3
M	10.27	11.2	2.4
F	14	12.6	2.6
F	15.5	13.1	2.8
F	20	14	3.9
F	10.6	11.6	2.5
F	16.2	12.7	2.8
F	13.2	12.2	2.3
F	10.6	11.4	2.4
F	5.92	8.9	1.6
F	6.57	10	2
F	6.31	10	2.1
F	4.42	8.5	1.7
F	5.45	9	1.8
F	3.96	8	1.6
F	12.52	11.6	2.2
F	23.5	15.2	3.3
F	12.6	11.5	2.1
F	22	15	3.3
F	14.2	12	2.5
F	15.5	13.1	2.8
F	20.5	14.1	3.9
F	10.4	11.5	2.5
M	8.62	11.1	2.5
M	5.15	9.5	2.1
M	5.5	8.6	2
M	4.72	9	1.2
M	16.5	13.8	3.3
M	9.95	12	3
M	12.3	11.6	2.5
M	8.72	11.1	2.8
M	10.85	11.5	2.2
M	6.53	10	2.2
M	5.73	9.6	2
M	8.5	10.4	2.3
M	12	11.6	2.8
M	3.95	8.6	1.3
M	5.12	8.8	1.7
M	5.5	8.6	2
M	8.5	10.4	2.3
M	5.45	9.6	2.3
M	7.1	10.7	2.3
M	15.05	13	3
M	17.28	14	2.7
M	16.31	14	2.9
M	13.81	12.2	2.6
M	12.49	12	2.6
M	9.7	11.2	2.5
M	10.3	11.4	2.3
F	11.38	12	2.5
F	9.87	11.2	2.3
F	10.5	11.7	2.5
F	7	10.2	2.3
F	6.3	10	2
F	7.9	10.6	2.4
F	3.75	8.1	1.2
F	8.4	10.9	2.4
F	13.98	12.4	2.6
F	14.8	13.1	2.7
F	9.33	12	2.9
F	11	11.5	2.8
F	11.83	12.6	2.6
F	10.64	11.9	2.7
F	12.27	13	2.6
F	13.17	12.9	2.7
F	12.12	12.7	3
F	6.41	10.6	2.4
F	12.67	13	2.6
F	17	13.9	3
F	8.4	10.9	2.4
F	9.6	11.2	2.3
F	10.5	11.7	2.5
F	7	10.2	2.3
F	8.15	10.7	2.9
F	14.42	12.4	2.9
F	10.71	11.4	2.6
F	9.18	10.5	2.5
F	9.44	11.2	2.5
F	12.13	11.7	2.7
F	12.42	12.2	2.4
F	5.68	9.2	2.3
F	8.4	10.9	2.4
F	11.38	12	2.5
F	9.87	11.2	2.3
F	10.5	11.7	2.5
F	7	10.2	2.3
F	6.3	10	2
F	7.9	10.6	2.4
F	3.75	8.1	1.2
F	8.4	10.9	2.4
F	9.6	11.2	2.3
F	10.5	11.7	2.5
F	7	10.2	2.3
F	8.15	10.7	2.9
M	5.3	9.2	2.1
M	6.61	10	2.1
M	5.15	9.5	2.1
M	6.53	10	2.2
M	5.73	9.6	2
M	7.1	10.5	2.3
M	4.52	9.2	2.1
M	4.4	9.1	2.1
M	11.65	12.2	2.4
M	8.65	11.4	2.6
M	2.43	7.3	1.5
M	4.72	9	1.2
M	3.95	8.6	1.3
M	3.95	8.6	1.3
M	16.45	13.6	3.3
M	9.95	12	3
M	5.45	9.6	2.3
M	7.1	10.7	2.3
M	4.85	9.6	2.1
M	5.32	9.4	2.1
M	11.88	12.3	3.2
M	14.53	13.6	3
M	13.74	13.1	2.7
M	20.03	14.7	3.1
M	11.59	12.4	2.7
M	12.29	13.3	3
M	13.95	13.6	2.9
M	5.43	9.4	2.1
M	4.85	9.6	2.1
M	5.23	9.4	2.1
M	9.15	11.2	2.3
M	10.5	12	2.6
M	11.6	12.3	2.4
M	7.22	10.9	2.4
M	7.1	10.5	2.3
M	4.52	9.2	2.1
M	4.4	9.1	2.1
M	11.65	12.2	2.4
M	8.65	11.4	2.6
M	21.5	15.4	3
M	4.72	9	1.2
M	3.95	8.6	1.3
M	16.45	13.6	3.3
M	9.95	12	3
M	5.45	9.6	2.3
M	7.1	10.7	2.3
M	4.85	9.6	2.1
M	5.32	9.4	2.1
M	2.4	7.3	1.5
M	5.3	9.2	2.1
M	5.15	9.5	2.1
M	6.53	10	2.2
M	5.76	9.5	2
M	5.8	9.9	2.2
M	4.5	9.3	2.1
F	13	13.2	2.9
F	4.56	9.6	2.1
F	10.3	11.9	2.5
F	5.1	9.3	2
F	7.1	10.5	2.5
F	7.31	10.4	2.2
F	8	10.7	2.2
F	6.5	9.9	2.1
F	6.35	9.7	2.1
F	12.72	13	2.9
F	4.75	9.4	2
F	6.3	10	2
F	7.9	10.6	2.4
F	3.75	8.1	1.2
F	8.4	10.9	2.4
F	11.42	12	2.5
F	9.6	11.2	2.3
F	10.5	11.7	2.5
F	7	10.2	2.3
F	8.15	10.7	2.9
M	8.9	11	1.9
M	8	10.2	1.8
M	9.1	10.9	1.9
M	9.4	11.4	2.5
M	6.65	9.6	1.9
M	10.35	11.3	2.1
M	10.9	11.9	2
M	8	11.1	1.9
M	11.65	11.7	2.2
M	8.1	10.6	1.9
M	15.65	13.7	3
M	9.7	11.2	2.5
M	10.3	11.4	2.3
M	11	11.4	2.1
M	10.2	11.2	2.2
M	7.62	10.4	1.9
M	9.6	11.5	2
M	10.85	11.5	2.2
M	5.12	8.8	1.7
M	7.2	10.3	2.3
M	5.65	9.1	1.7
M	7.2	10.2	2.2
M	5.65	9	1.7
M	7.7	10.5	2
M	7.8	10.4	2
M	5.5	9	1.7
M	3.95	7.6	1.6
M	4.3	7.8	1.6
M	9.06	11	2.2
M	8.32	10.8	1.9
M	6.75	10.6	2.3
M	8.81	10.9	1.9
M	8.08	10.3	1.8
M	9.4	10.9	1.9
M	9.35	11.4	2.5
M	6.65	9.6	1.9
F	13.25	12.2	2.3
F	13.35	12.4	2.7
F	16.5	13.5	3
F	10.8	11.5	2.8
F	11.8	11.9	2.6
F	10.6	11.4	2.4
F	5.92	8.9	1.6
F	6.57	10	2
F	6.31	10	2.1
F	4.42	8.5	1.7
F	5.45	9	1.8
F	3.96	8	1.6
F	12.52	11.6	2.2
F	8.82	10.5	2.1
F	14	12.6	2.6
F	15.5	13.1	2.8
F	20	14	3.9
F	10.6	11.6	2.5
F	15.8	12.7	2.8
F	19.6	13.6	2.7
F	18.6	13.9	3
F	14.5	12.7	2.7
F	9.54	11.2	2
F	10.64	11.6	2.6
F	9.2	10.8	2.7
M	5.5	8.6	2
M	8.5	10.4	2.3
M	9.7	11.2	2.2
M	15.2	13	2.7
M	34	16.2	3.9
M	60	17.5	4.8
M	9.35	11.4	2.5
M	6.65	9.6	1.9
M	10.8	11.5	2.2
M	10.32	11.4	2.3
M	12.7	12.3	2.3
M	11.5	11.7	2.2
M	8.5	9.9	2.5
M	6.5	9	2.3
M	12.7	12.3	2.3
M	11.5	11.7	2.2
M	9.4	10.9	1.9
M	9.35	10.8	1.9
M	10.4	11.4	2.3
M	11	11.4	2.1
M	12.85	12	2.5
M	6.75	10.6	2.3
M	8.81	10.9	1.9
F	16.2	12.7	2.8
F	13.2	12.2	2.3
F	14	12.6	2.6
F	15.5	13.1	2.8
F	20	14	3.9
F	10.6	11.6	2.5
F	16.2	12.7	2.8
F	19.6	13.6	2.7
F	16.5	13.5	3
F	10.8	11.5	2.8
F	18.6	13.9	3
F	9.2	10.8	2.7
F	16.2	12.7	2.8
F	13.2	12.2	2.3
F	18.6	13.9	3
F	9.2	10.8	2.7
F	6.65	10	2
F	6.3	10	2.1
F	14.2	12	2.5
F	15.5	13.1	2.8
F	9.6	11.2	2.3
F	10.5	11.7	2.5
M	16.3	14	3
M	9.2	11.5	2.5
M	10.3	11.5	2.9
M	15.05	13	3
M	34	16.2	3.9
M	60	17.5	4.8
M	12.5	11.5	2.9
M	7	10.1	2.6
M	8.5	9.9	2.5
M	6.5	9	2.3
M	5.5	8.6	2
M	8.5	10.4	2.3
M	12	11.6	2.8
M	14.5	12.2	3.1
M	6.5	9.6	2.2
M	10.6	11.5	2
M	9	11	2.2
M	12.85	12	2.5
M	6.75	10.6	2.3
M	8.81	10.9	1.9
M	7.8	10.4	2
M	9.4	10.9	1.9
M	17.28	14	2.7
M	16.31	14	2.9
M	12.95	12.2	2.6
M	12.21	12.6	2.7
F	11	11.5	2.8
F	11.85	12.6	2.6
F	66.5	20	5.2
F	14.5	12.7	2.7
F	4	8	1.6
F	12.5	11.5	2.2
F	23.5	15.2	3.3
F	14	12.6	2.6
F	15.5	13.1	2.8
F	20	14	3.9
F	10.6	11.6	2.5
F	16.2	12.7	2.8
F	13.2	12.2	2.3
F	19.6	13.6	2.7
F	16.5	13.5	3
F	10.8	11.5	2.8
F	18.6	13.9	3
F	9.2	10.8	2.7
F	8.82	10.5	2.1
F	6.5	10	1.8
F	11.38	12	2.5
F	9.87	11.2	2.3
F	10.5	11.7	2.5
F	12.8	13.1	2.6
F	17	13.9	3
F	8.4	10.9	2.4
F	7	10.2	2.3
F	6.3	10	2
F	7.9	10.6	2.4
F	12.08	12.5	2.5
F	10.18	12	2.6
F	5.68	9.7	2
F	13.17	12.9	2.7
F	12.12	12.7	3
F	6.41	10.6	2.4
F	12.67	13	2.6
F	17	13.9	3
F	10.1	12.2	2.6
F	11.38	12	2.5
F	9.87	11.2	2.3
F	10.5	11.7	2.5
F	15.23	13.5	2.7
F	18.83	14.5	3
F	12.83	13.3	2.9
F	11.42	12	2.5
F	9.6	11.2	2.3
F	10.5	11.7	2.5
F	7	10.2	2.3
F	8.15	10.7	2.9
F	8.3	10.7	2.7
F	12.7	13	2.8
F	4.78	9.6	2.1
F	10.15	11.8	2.5
F	5.26	9.3	2
F	6.84	10.5	2.5
F	3.75	8.1	1.2
F	8.4	10.9	2.4
F	14.2	12.5	2.6
M	15	13	3
M	11.88	12.3	3.2
M	14.53	13.6	3
M	13.74	13.1	2.7
M	20.03	14.7	3.1
M	11.59	12.4	2.7
M	12.29	13.3	3
M	6.5	10	2.2
M	5.75	9.6	2
M	7.1	10.5	2.3
M	4.52	9.2	2.1
M	4.4	9.1	2.1
M	11.65	12.2	2.4
M	8.65	11.4	2.6
M	21.5	15.4	3
M	4.72	9	1.2
M	3.95	8.6	1.3
M	16.45	13.6	3.3
M	9.95	12	3
M	9.04	11.2	2.3
M	10.5	12	2.6
M	11.54	12.2	2.5
M	7.22	10.9	2.4
M	7.1	10.7	2.3
M	5.43	9.4	2.1
M	4.85	9.6	2.1
M	5.23	9.4	2.1
M	2.43	7.3	1.5
M	11.59	12.4	2.7
M	12.29	13.3	3
M	13.95	13.6	2.9
M	5.43	9.4	2.1
M	10.99	12.4	2.7
M	7.73	10.6	2.3
M	7.1	10.5	2.3
M	4.52	9.2	2.1
M	21	15.4	3.1
M	4.72	9	1.2
M	3.95	8.6	1.3
M	16.6	13.6	3.3
M	9.95	12	3
M	9.04	11.2	2.3
M	10.5	12	2.6
M	12	12.5	2.7
M	7.22	10.9	2.4
M	6.96	10.5	2.3
M	4.44	8.9	2
M	4.59	9.1	2.1
M	11.5	12.2	2.4
M	8.6	11.4	2.6
M	5.3	9.2	2.1
M	4.52	9.2	2.1
M	4.4	9.1	2.1
M	11.65	12.2	2.4
M	8.65	11.4	2.6
M	5.8	9.9	2.2
M	4.5	9.3	2.1
M	5.45	9.6	2.3
M	7.1	10.7	2.3
M	5.3	9.4	2.1
M	4.85	9.6	2.1
M	5.2	9.4	2.1
M	2.4	7.3	1.5
F	13	13.2	2.9
F	4.56	9.6	2.1
F	10.3	11.9	2.5
F	5.1	9.3	2
F	8.4	10.9	2.4
F	11.38	12	2.5
F	9.87	11.2	2.3
F	10.5	11.7	2.5
F	7	10.2	2.3
F	8.15	10.7	2.9
F	12.08	12.5	2.5
F	10.18	12	2.6
F	5.68	9.7	2
F	13.2	12.9	2.7
F	6.84	10.5	2.5
F	7.28	10.4	2.2
F	7.98	10.7	2.2
F	6.51	9.9	2.1
F	6.47	9.7	2.1
F	12.69	13	2.9
F	4.77	9.4	2
F	6.24	10	2
F	7.98	10.6	2.4
F	3.84	8.1	1.2
F	12.7	13	2.8
F	4.78	9.6	2.1
F	10.15	11.8	2.5
F	5.26	9.3	2
F	6.84	10.5	2.5
F	6.41	10.6	2.4
F	12.67	13	2.6
F	17	13.9	3
F	10.8	11.5	3
F	14.1	12.4	2.9
F	9.88	10.7	2.3
F	8.33	10.4	2.1
F	14.42	12.4	2.9
F	10.71	11.4	2.6
F	9.18	10.5	2.5
F	9.44	11.2	2.5
F	12.13	11.7	2.7
F	12.42	12.2	2.4
F	5.68	9.2	2.3
F	3.43	8	1.3
F	7.04	9.9	2.1
F	7.16	10.3	2.3
F	13	13.2	2.9
F	4.56	9.6	2.1
F	10.3	11.9	2.5
F	5.1	9.3	2
F	7.1	10.5	2.5
F	7.31	10.4	2.2
F	8	10.7	2.2
F	6.5	9.9	2.1
F	6.35	9.7	2.1
F	12.72	13	2.9
F	4.75	9.4	2
F	5.26	9.3	2
F	6.84	10.5	2.5
F	7.28	10.4	2.2
F	7.98	10.7	2.2
F	6.51	9.9	2.1
F	9.6	11.2	2.3
F	10.5	11.7	2.5
F	7	10.2	2.3
F	8.15	10.7	2.9
M	15.74	12.6	2.6
M	13.96	12.7	2.8
M	10.72	11.41	2.6
M	13.37	12.3	2.7
M	8.33	10.1	2.3
M	5.34	8.9	2.1
M	9.76	11.2	2.5
M	14.35	12.5	2.6
M	12.46	12	2.7
M	11.39	11.6	2.6
M	12.3	11.6	2.5
M	4.38	12.3	2.6
M	13.81	12.2	2.6
M	12.49	12	2.6
M	6.05	9.5	2.1
M	9.7	11.2	2.5
M	10.3	11.4	2.3
M	11	11.4	2.1
M	10.2	11.2	2.2
M	7.62	10.4	1.9
M	9.6	11.5	2
M	10.85	11.5	2.2
M	5.12	8.8	1.7
M	7.2	10.3	2.3
M	5.65	9.1	1.7
M	7.2	10.2	2.2
M	5.65	9	1.7
M	7.7	10.5	2
M	7.8	10.4	2
M	5.5	9	1.7
M	3.95	7.6	1.6
M	4.3	7.8	1.6
M	3.8	6.4	1.4
M	9.06	11	2.2
M	8.32	10.8	1.9
M	6.75	10.6	2.3
M	8.81	10.9	1.9
M	8.08	10.3	1.8
M	9.4	10.9	1.9
M	9.35	11.4	2.5
M	6.65	9.6	1.9
M	10.35	11.3	2.1
M	10.87	11.9	2
M	8.03	11.1	1.9
M	11.68	11.7	2.2
M	10.78	11.6	2.3
M	8.75	11	2.1
M	7.43	10.3	2
M	16.75	13.8	2.9
M	5.75	9.5	1.8
M	10.27	11.2	2.4
M	9.7	11.2	2.2
M	15.2	13	2.7
M	8.08	10.6	1.9
M	15.61	13.7	3
M	9.73	11.2	2.5
M	10.32	11.4	2.3
M	11	11.4	2.1
M	10.2	11.2	2.2
M	7.62	10.4	1.9
M	9.6	11.5	2
M	12.7	12.3	2.3
M	16.15	14	3
M	8.45	10.7	2
M	12.92	12.1	2.6
M	6.47	9.9	2.2
M	6.56	9.8	1.8
M	8.62	11.1	2.5
M	8.72	11.1	2.8
M	10.85	11.5	2.2
M	5.12	8.8	1.7
M	7.18	10.3	2.3
M	5.62	9.1	1.7
M	7.67	10.5	2
M	7.72	10.4	2
M	5.24	9	1.7
M	3.92	7.7	1.6
M	4.22	7.6	1.5
F	12.47	11.6	2.2
F	23.1	15.1	3.3
F	14.14	12.7	2.5
F	15.24	13	2.8
F	20	14	3.9
F	10.43	11.5	2.5
F	15.56	12.7	2.8
F	19.52	13.8	2.7
F	18.6	13.9	3
F	14.5	12.7	2.7
F	9.54	11.2	2
F	10.64	11.6	2.6
F	13.26	12.2	2.3
F	13.35	12.4	2.7
F	16.61	13.5	3
F	10.8	11.5	2.8
F	11.8	11.9	2.6
F	10.6	11.4	2.4
F	9.05	10.8	2.7
F	8.75	10.8	2.1
F	5.92	8.9	1.6
F	6.57	10	2
F	6.31	10	2.1
F	4.42	8.5	1.7
F	5.45	9	1.8
F	3.96	8	1.6
M	8.5	10.4	2.3
M	12	11.6	2.8
M	3.6	7.4	1.1
M	4.9	8.2	1.5
M	6.4	9.8	1.9
M	4.7	8.2	1.5
M	11.2	11	2.2
M	16.5	13.6	2.9
M	8.4	10.9	2.3
M	10	11	2.1
M	6	8.9	2
M	5.4	8.5	1.8
M	9.4	10.9	1.9
M	9	10.2	1.9
M	10.4	11.4	2.3
M	11	11.4	2.1
M	12.4	11.8	2.5
M	6.6	9.1	2.3
M	8.6	10.6	1.9
M	9.7	11.2	2.2
M	14.6	12.7	2.7
M	34	16.2	3.9
M	60	17.5	4.8
M	9.1	10.2	2.5
M	6.2	9	1.9
M	10.8	11.5	2.2
M	10	11.1	2.3
M	12.7	12.3	2.3
M	11.5	11.7	2.2
M	8.5	9.9	2.5
M	6.5	9	2.3
M	12.7	12.3	2.3
M	11.5	11.7	2.2
F	10.5	11.7	2.5
F	6.2	9	2.1
F	4.4	8.4	1.7
F	5.5	9	1.8
F	4	8	1.6
F	12.5	11.6	2.2
F	13.2	12.2	2.3
F	19.5	13.6	2.7
F	13.2	12.2	2.3
F	14	12.6	2.6
F	15.5	13.1	2.8
F	20	14	3.9
F	10.6	11.6	2.5
F	16.2	12.7	2.8
F	19.6	13.6	2.7
F	16.2	13	3
F	10.8	11.5	2.8
F	18.6	13.9	3
F	9.2	10.8	2.7
F	16.2	12.5	2.8
F	13.2	12.2	2.3
F	18.4	13.7	3
F	9.2	10.8	2.7
F	6.65	10	2
F	6.3	10	2.1
F	14.2	12	2.5
F	15.5	13.1	2.8
F	9.6	11.2	2.3
M	34	16.2	3.9
M	60	17.5	4.8
M	12.5	11.5	2.9
M	7	10.1	2.6
M	8.5	9.9	2.5
M	6.5	9	2.3
M	5.5	8.6	2
M	8.5	10.4	2.3
M	12	11.6	2.8
M	14.5	12.2	3.1
M	6.5	9.6	2.2
M	10.6	11.5	2
M	9	11	2.2
M	12.85	12	2.5
M	6.75	10.6	2.3
M	8.81	10.9	1.9
M	7.8	10.4	2
M	9.4	10.9	1.9
M	9.35	11.4	2.5
M	6.65	9.6	1.9
M	16.15	14	3
F	66.5	20	5.2
F	14.5	12.7	2.7
F	4	8	1.6
F	12.5	11.5	2.2
F	23.5	15.2	3.3
F	14	12.6	2.6
F	15.5	13.1	2.8
F	20	14	3.9
F	10.6	11.6	2.5
F	16.2	12.7	2.8
F	13.2	12.2	2.3
F	19.6	13.6	2.7
F	16.5	13.5	3
F	10.8	11.5	2.8
F	18.6	13.9	3
F	9.2	10.8	2.7
F	8.82	10.5	2.1
F	6.5	10	1.8
F	9.5	11	2
M	16.3	14	3
M	9.2	11.5	2.5
M	10.3	11.5	2.9
M	15.05	13	3
M	17.28	14	2.7
M	16.31	14	2.9
M	12.95	12.2	2.6
M	12.21	12.6	2.7
M	15.45	13	2.7
M	14.75	13.5	2.7
M	5.77	9.7	2
M	14.52	13.2	2.5
M	8.84	11.3	2.4
M	6.56	9.8	1.8
M	8.62	11.1	2.5
M	8.72	11.1	2.8
M	10.85	11.5	2.2
M	5.12	8.8	1.7
M	5.5	8.6	2
M	8.5	10.4	2.3
M	12	11.6	2.8
M	14.5	12.2	3.1
M	6.5	9.6	2.2
F	32.92	17.6	3.6
F	25.38	16	3.2
F	16.29	14	2.7
F	15.58	13.7	2.8
F	18.99	14.5	2.7
F	20	14.5	2.8
F	15.31	13.4	2.9
F	18.39	14.5	2.9
F	14.3	13.3	2.9
F	13.98	12.4	2.6
F	14.8	13.1	2.7
F	9.33	12	2.9
F	11	11.5	2.8
F	11.83	12.6	2.6
F	10.64	11.9	2.7
F	12.27	13	2.6
F	8.27	10.6	2.6
F	4.57	9.5	1.7
F	11.42	12	2.5
F	9.6	11.2	2.3
F	10.5	11.7	2.5
F	7	10.2	2.3
F	8.15	10.7	2.9
F	9.18	10.5	2.5
F	9.44	11.2	2.5
F	12.13	11.7	2.7
F	12.42	12.2	2.4
F	5.68	9.2	2.3
F	8.4	10.9	2.4
F	13.25	12.2	2.3
F	13.35	12.4	2.7
F	16.5	13.5	3
F	10.8	11.5	2.8
F	11.8	11.9	2.6
F	10.6	11.4	2.4
F	12.08	12.5	2.5
F	10.18	12	2.6
F	5.68	9.7	2
F	13.17	12.9	2.7
F	12.12	12.7	3
F	6.41	10.6	2.4
F	12.67	13	2.6
F	17	13.9	3
F	10.1	12.2	2.6
F	15.23	13.5	2.7
F	18.83	14.5	3
F	12.83	13.3	2.9
F	11.42	12	2.5
F	9.6	11.2	2.3
F	10.5	11.7	2.5
F	7	10.2	2.3
F	8.15	10.7	2.9
F	8.3	10.7	2.7
F	12.7	13	2.8
F	4.78	9.6	2.1
F	10.15	11.8	2.5
F	5.26	9.3	2
F	6.84	10.5	2.5
M	11.88	12.3	3.2
M	14.53	13.6	3
M	13.74	13.1	2.7
M	20.03	14.7	3.1
M	11.59	12.4	2.7
M	12.29	13.3	3
M	13.95	13.6	2.9
M	15.18	13.7	2.8
M	11.11	12.7	2.7
M	17.33	14.5	3
M	10.99	12.4	2.7
M	7.73	10.6	2.3
M	7.1	10.5	2.3
M	4.52	9.2	2.1
M	4.4	9.1	2.1
M	11.65	12.2	2.4
M	8.65	11.4	2.6
M	2.43	7.3	1.5
M	4.72	9	1.2
M	3.95	8.6	1.3
M	16.45	13.6	3.3
M	9.95	12	3
M	9.04	11.2	2.3
M	10.5	12	2.6
M	11.54	12.2	2.5
M	7.22	10.9	2.4
M	7.1	10.7	2.3
M	5.43	9.4	2.1
M	4.85	9.6	2.1
M	5.23	9.4	2.1
M	21.18	15.2	3
M	4.72	9	1.2
M	3.95	8.6	1.3
M	16.45	13.6	3.3
M	9.95	12	3
M	9.04	11.2	2.3
M	10.5	12	2.6
M	11.54	12.2	2.5
M	7.22	10.9	2.4
M	6.96	10.5	2.3
M	4.44	8.9	2
M	4.59	9.1	2.1
M	11.65	12.2	2.4
M	8.58	11.4	2.6
M	5.3	9.2	2.1
M	6.61	10	2.1
M	5.15	9.5	2.1
M	6.53	10	2.2
M	5.73	9.6	2
M	5.8	9.9	2.2
M	4.5	9.3	2.1
M	5.45	9.6	2.3
M	7.1	10.7	2.3
M	5.43	9.4	2.1
M	4.85	9.6	2.1
M	5.23	9.4	2.1
M	2.43	7.3	1.5
F	8.4	10.9	2.4
F	11.38	12	2.5
F	9.87	11.2	2.3
F	10.5	11.7	2.5
F	7	10.2	2.3
F	8.15	10.7	2.9
F	12.7	13	2.8
F	4.78	9.6	2.1
F	10.15	11.8	2.5
F	5.26	9.3	2
F	6.84	10.5	2.5
F	7.28	10.4	2.2
F	7.98	10.7	2.2
F	6.51	9.9	2.1
F	6.47	9.7	2.1
F	12.69	13	2.9
F	4.77	9.4	2
F	6.24	10	2
F	7.98	10.6	2.4
F	3.84	8.1	1.2
M	9.06	11	2.2
M	8.32	10.8	1.9
M	6.75	10.6	2.3
M	8.81	10.9	1.9
M	8.08	10.3	1.8
M	9.4	10.9	1.9
M	9.35	11.4	2.5
M	6.65	9.6	1.9
M	10.35	11.3	2.1
M	10.87	11.9	2
M	8.03	11.1	1.9
M	11.68	11.7	2.2
M	10.78	11.6	2.3
M	8.75	11	2.1
M	7.43	10.3	2
M	16.75	13.8	2.9
M	5.75	9.5	1.8
M	10.27	11.2	2.4
M	9.7	11.2	2.2
M	15.2	13	2.7
M	8.08	10.6	1.9
M	15.61	13.7	3
M	9.73	11.2	2.5
M	10.32	11.4	2.3
M	11	11.4	2.1
M	10.2	11.2	2.2
M	7.62	10.4	1.9
M	9.6	11.5	2
M	12.7	12.3	2.3
M	16.15	14	3
M	8.45	10.7	2
M	12.92	12.1	2.6
M	6.47	9.9	2.2
M	6.56	9.8	1.8
M	8.62	11.1	2.5
M	8.72	11.1	2.8
M	10.85	11.5	2.2
M	5.12	8.8	1.7
M	7.18	10.3	2.3
M	5.62	9.1	1.7
M	7.67	10.5	2
M	7.72	10.4	2
M	5.24	9	1.7
M	3.92	7.7	1.6
M	4.22	7.6	1.5
F	12.47	11.6	2.2
F	23.1	15.1	3.3
F	14.14	12.7	2.5
F	15.24	13	2.8
F	20	14	3.9
F	10.43	11.5	2.5
F	15.56	12.7	2.8
F	19.52	13.8	2.7
F	18.6	13.9	3
F	14.5	12.7	2.7
F	9.54	11.2	2
F	10.64	11.6	2.6
F	13.26	12.2	2.3
F	13.35	12.4	2.7
F	16.61	13.5	3
F	10.8	11.5	2.8
F	11.8	11.9	2.6
F	10.6	11.4	2.4
F	9.05	10.8	2.7
F	8.75	10.8	2.1
F	5.92	8.9	1.6
F	6.57	10	2
F	6.31	10	2.1
F	4.42	8.5	1.7
F	5.45	9	1.8
F	3.96	8	1.6
		20
	66.5	6.4
	2.4

## Sheet: Sheet2
Sex	TL (cm)	Wt.(gm)		LOG TL	LOG W
M	11	8.6		1.04139	0.934498
M	11.3	10.4		1.05308	1.01703
M	9	6.2		0.954243	0.792392
M	8.6	5.5		0.934498	0.740363
M	10.4	8.5		1.01703	0.929419
M	11	11.2		1.04139	1.04922
M	13.6	16.5		1.13354	1.21748
M	10.9	8.4		1.03743	0.924279
M	11	10		1.04139	1
M	8.9	6		0.94939	0.778151
M	8.5	5.4		0.929419	0.732394
M	10.4	8.5		1.01703	0.929419
M	11.6	12		1.06446	1.07918
M	7.4	3.6		0.869232	0.556303
M	8.2	4.9		0.913814	0.690196
M	9.8	6.4		0.991226	0.80618
M	8.2	4.7		0.913814	0.672098
M	10.4	8.5		1.01703	0.929419
M	11.2	9.7		1.04922	0.986772
M	12.7	14.6		1.1038	1.16435
M	16.2	34		1.20952	1.53148
M	17.5	60		1.24304	1.77815
M	10.2	9.1		1.0086	0.959041
M	9	6.2		0.954243	0.792392
M	11.5	10.8		1.0607	1.03342
M	11.1	10		1.04532	1			SUMMARY OUTPUT
M	12.3	12.7		1.08991	1.1038
M	11.7	11.5		1.06819	1.0607			Regression Statistics
M	9.9	8.5		0.995635	0.929419			Multiple R	0.968213					a	b	SE of a	95% CL a	95% CL b	r2
M	9	6.5		0.954243	0.812913			R Square	0.937437					0.00876836	2.8956	1.04851	0.0079-0.0096	2.85-2.93	0.93
M	12.3	12.7		1.08991	1.1038			Adjusted R Square	0.937394
M	11.7	11.5		1.06819	1.0607			Standard Error	0.0506586
M	10.9	9.4		1.03743	0.973128			Observations	1447
M	10.2	9		1.0086	0.954243											0.00799033	0.00962214
M	11.4	10.4		1.0569	1.01703			ANOVA
M	11.4	11		1.0569	1.04139				df	SS	MS	F	Significance F
M	11.8	12.4		1.07188	1.09342			Regression	1	55.5648	55.5648	21651.8	0
M	9.1	6.6		0.959041	0.819544			Residual	1445	3.70829	0.00256629
M	10.6	8.6		1.02531	0.934498			Total	1446	59.2731
F	12.7	16.2		1.1038	1.20952									Upper 95%	Lower 95.0%	Upper 95.0%
F	12.2	13.2		1.08636	1.12057				Coefficients	Standard Error	t Stat	P-value	Lower 95%	-2.01673	-2.09744	-2.01673
F	12.6	14		1.10037	1.14613			Intercept	-2.05708	0.0205716	-99.996	0	-2.09744	2.93426	2.85706	2.93426
F	13.1	15.5		1.11727	1.19033			X Variable 1	2.89566	0.0196789	147.145	0	2.85706
F	14	20		1.14613	1.30103
F	11.6	10.6		1.06446	1.02531
F	12.7	16.2		1.1038	1.20952
F	13.6	19.6		1.13354	1.29226
F	13	16.2		1.11394	1.20952
F	11.5	10.8		1.0607	1.03342
F	13.9	18.6		1.14301	1.26951
F	10.8	9.2		1.03342	0.963788
F	12.5	16.2		1.09691	1.20952
F	12.2	13.2		1.08636	1.12057
F	13.7	18.4		1.13672	1.26482
F	10.8	9.2		1.03342	0.963788
F	10	6.65		1	0.822822
F	10	6.3		1	0.799341
F	12	14.2		1.07918	1.15229
F	13.1	15.5		1.11727	1.19033
F	11.2	9.6		1.04922	0.982271
F	11.7	10.5		1.06819	1.02119
F	9	6.2		0.954243	0.792392
F	8.4	4.4		0.924279	0.643453
F	9	5.5		0.954243	0.740363
F	8	4		0.90309	0.60206
F	11.6	12.5		1.06446	1.09691
F	12.2	13.2		1.08636	1.12057
F	13.6	19.5		1.13354	1.29003
M	8.6	5.5		0.934498	0.740363
M	10.4	8.5		1.01703	0.929419
M	11.2	9.7		1.04922	0.986772
M	13	15.2		1.11394	1.18184
M	16.2	34		1.20952	1.53148
M	17.5	60		1.24304	1.77815
M	11.4	9.4		1.0569	0.973128
M	9.6	6.7		0.982271	0.826075
M	11.5	10.8		1.0607	1.03342
M	9.5	5.2		0.977724	0.716003
M	12.3	12.7		1.08991	1.1038
M	11.7	11.5		1.06819	1.0607
M	9.9	8.5		0.995635	0.929419
M	9	6.5		0.954243	0.812913
M	12.3	12.7		1.08991	1.1038
M	11.7	11.5		1.06819	1.0607
M	10.9	9.4		1.03743	0.973128
M	10.8	9.4		1.03342	0.973128
M	11.4	10.4		1.0569	1.01703
M	11.4	11		1.0569	1.04139
M	10	6.5		1	0.812913
M	10.6	6.8		1.02531	0.832509
M	10.9	8.81		1.03743	0.944976
M	11.6	12.3		1.06446	1.08991
M	11.1	8.7		1.04532	0.939519
M	8.8	5.1		0.944483	0.70757
M	10	6.5		1	0.812913
M	8.6	5.5		0.934498	0.740363
M	10.4	8.5		1.01703	0.929419
M	11.6	12		1.06446	1.07918
M	13.6	16.5		1.13354	1.21748
M	11.1	8.6		1.04532	0.934498
M	11.5	10.8		1.0607	1.03342
M	9	6.5		0.954243	0.812913
M	9.6	5.7		0.982271	0.755875
M	10.4	8.5		1.01703	0.929419
M	11.6	12		1.06446	1.07918
M	8.6	3.9		0.934498	0.591065
M	8.8	5.2		0.944483	0.716003
M	10	6.6		1	0.819544
F	10	6.5		1	0.812913
F	12.6	14		1.10037	1.14613
F	13.1	15.5		1.11727	1.19033
F	14	20		1.14613	1.30103
F	11.6	10.6		1.06446	1.02531
F	12.7	16.2		1.1038	1.20952
F	12.2	13.2		1.08636	1.12057
F	11.4	10.6		1.0569	1.02531
F	8.9	5.9		0.94939	0.770852
F	10	6.5		1	0.812913
F	10	6.31		1	0.800029
F	8.5	4.42		0.929419	0.645422
F	9	5.5		0.954243	0.740363
F	8	4		0.90309	0.60206
F	11.6	12.5		1.06446	1.09691
F	12.2	13.2		1.08636	1.12057
F	13.6	19.6		1.13354	1.29226
F	13.5	16.5		1.13033	1.21748
F	8	4.1		0.90309	0.612784
F	11.5	12.5		1.0607	1.09691
F	12.1	11.4		1.08279	1.0569
F	11.2	9.9		1.04922	0.995635
M	11.6	12.3		1.06446	1.08991
M	11.1	8.72		1.04532	0.940516
M	11.5	10.85		1.0607	1.03543
M	10	6.53		1	0.814913
M	8.6	5.5		0.934498	0.740363
M	10.4	8.5		1.01703	0.929419
M	11.6	12		1.06446	1.07918
M	13.6	16.5		1.13354	1.21748
M	11.1	8.62		1.04532	0.935507
M	11.2	10.27		1.04922	1.01157
M	9	6.5		0.954243	0.812913
M	9.6	5.73		0.982271	0.758155
M	10.4	8.5		1.01703	0.929419
M	11.6	12		1.06446	1.07918
M	8.6	3.95		0.934498	0.596597
M	8.8	5.12		0.944483	0.70927
M	10	6.61		1	0.820201
M	9.5	5.15		0.977724	0.711807
M	10	6.53		1	0.814913
M	8.8	5.15		0.944483	0.711807
M	13.7	15.61		1.13672	1.1934
M	11.5	10.8		1.0607	1.03342
F	10	6.5		1	0.812913
F	12.6	14		1.10037	1.14613
F	13.1	15.5		1.11727	1.19033
F	14	20		1.14613	1.30103
F	11.6	10.6		1.06446	1.02531
F	12.7	16.2		1.1038	1.20952
F	12.2	13.2		1.08636	1.12057
F	11.4	10.6		1.0569	1.02531
F	8.9	5.92		0.94939	0.772322
F	10	6.57		1	0.817565
F	10	6.31		1	0.800029
F	8.5	4.42		0.929419	0.645422
F	9	5.45		0.954243	0.736397
F	8	3.96		0.90309	0.597695
F	11.6	12.52		1.06446	1.0976
F	12.2	13.2		1.08636	1.12057
F	13.6	19.6		1.13354	1.29226
F	13.5	16.5		1.13033	1.21748
F	8	4.1		0.90309	0.612784
F	11.5	12.5		1.0607	1.09691
F	12.1	11.42		1.08279	1.05767
F	11.2	9.9		1.04922	0.995635
M	9.8	6.56		0.991226	0.816904
M	11.1	8.62		1.04532	0.935507
M	11.1	8.72		1.04532	0.940516
M	11.5	10.85		1.0607	1.03543
M	11.2	9.7		1.04922	0.986772
M	13	15.2		1.11394	1.18184
M	8.8	5.15		0.944483	0.711807
M	13.7	15.61		1.13672	1.1934
M	11.5	10.8		1.0607	1.03342
M	11.4	10.32		1.0569	1.01368
M	11.4	11		1.0569	1.04139
M	7.7	4		0.886491	0.60206
M	7.6	4.32		0.880814	0.635484
M	11.5	9.6		1.0607	0.982271
M	12.3	12.7		1.08991	1.1038
M	11.7	11.5		1.06819	1.0607
M	11.5	10.7		1.0607	1.02938
M	11	8.75		1.04139	0.942008
M	10.3	7.2		1.01284	0.857332
M	13	15.45		1.11394	1.18893
M	13.5	14.75		1.13033	1.16879
M	9.7	5.77		0.986772	0.761176
M	13.2	14.52		1.12057	1.16197
M	11.3	8.84		1.05308	0.946452
F	12.4	14		1.09342	1.14613
F	13.1	14.8		1.11727	1.17026
F	10.6	6.4		1.02531	0.80618
F	12.6	14		1.10037	1.14613
F	13.1	15.5		1.11727	1.19033
F	14	20		1.14613	1.30103
F	11.6	10.6		1.06446	1.02531
F	12.7	16.2		1.1038	1.20952
F	12.2	13.2		1.08636	1.12057
F	11.4	10.6		1.0569	1.02531
F	8.9	5.92		0.94939	0.772322
F	10	6.57		1	0.817565
F	10	6.31		1	0.800029
F	8.5	4.42		0.929419	0.645422
F	9	5.45		0.954243	0.736397
F	8	3.96		0.90309	0.597695
F	11.6	12.52		1.06446	1.0976
F	15.2	23.5		1.18184	1.37107
F	11.5	12.6		1.0607	1.10037
F	15	22		1.17609	1.34242
F	12	14.2		1.07918	1.15229
F	13.1	15.5		1.11727	1.19033
F	14.1	20.5		1.14922	1.31175
F	11.5	10.4		1.0607	1.01703
F	10.9	8.4		1.03743	0.924279
F	11.2	9.6		1.04922	0.982271
F	11.7	10.5		1.06819	1.02119
F	10.2	7		1.0086	0.845098
F	13	12.7		1.11394	1.1038
F	13.9	17		1.14301	1.23045
F	10.9	8.4		1.03743	0.924279
F	11.2	9.44		1.04922	0.974972
F	11.7	12.13		1.06819	1.08386
F	12.2	12.42		1.08636	1.09412
F	9.2	5.68		0.963788	0.754348
F	10.9	8.4		1.03743	0.924279
F	12	11.38		1.07918	1.05614
F	12.9	13.2		1.11059	1.12057
F	12.7	12.1		1.1038	1.08279
F	10.6	6.45		1.02531	0.80956
F	12	9.4		1.07918	0.973128
F	11.2	9.9		1.04922	0.995635
F	11.7	10.5		1.06819	1.02119
F	10.2	7		1.0086	0.845098
F	10	6.3		1	0.799341
F	10.6	7.9		1.02531	0.897627
F	8.1	3.75		0.908485	0.574031
F	10.9	8.4		1.03743	0.924279
F	11.2	9.6		1.04922	0.982271
F	11.7	10.5		1.06819	1.02119
F	10.2	7		1.0086	0.845098
F	10.7	8.15		1.02938	0.911158
F	13.9	17		1.14301	1.23045
F	10.9	8.4		1.03743	0.924279
F	11.2	9.6		1.04922	0.982271
F	11.7	10.5		1.06819	1.02119
F	10.2	7		1.0086	0.845098
F	10.7	8.15		1.02938	0.911158
M	10	6.65		1	0.822822
M	9.5	5.15		0.977724	0.711807
M	10	6.5		1	0.812913
M	9.6	5.7		0.982271	0.755875
M	10.5	7.1		1.02119	0.851258
M	9.2	4.65		0.963788	0.667453
M	9.1	4.4		0.959041	0.643453
M	12.2	11.65		1.08636	1.06633
M	11	8.65		1.04139	0.937016
M	9.5	5.15		0.977724	0.711807
M	8.6	5.5		0.934498	0.740363
M	9	4.72		0.954243	0.673942
M	11.4	8.65		1.0569	0.937016
M	15.4	21.5		1.18752	1.33244
M	9	4.72		0.954243	0.673942
M	8.6	3.95		0.934498	0.596597
M	8.6	3.95		0.934498	0.596597
M	13.6	16.45		1.13354	1.21617
M	12	9.95		1.07918	0.997823
M	9.6	5.45		0.982271	0.736397
M	10.7	7.1		1.02938	0.851258
M	9.6	4.85		0.982271	0.685742
M	9.4	5.23		0.973128	0.718502
M	7.3	2.43		0.863323	0.385606
M	11.4	10.3		1.0569	1.01284
M	9.6	4.85		0.982271	0.685742
M	9.4	5.32		0.973128	0.725912
M	12.3	11.88		1.08991	1.07482
M	13.6	14.53		1.13354	1.16227
M	13.1	13.74		1.11727	1.13799
M	14.7	20.03		1.16732	1.30168
M	8.6	3.95		0.934498	0.596597
M	13.6	16.45		1.13354	1.21617
M	12	9.95		1.07918	0.997823
M	9.6	5.45		0.982271	0.736397
M	13.6	13.95		1.13354	1.14457
M	11.2	9.15		1.04922	0.961421
M	12	10.5		1.07918	1.02119
M	12.3	11.6		1.08991	1.06446
M	10.9	7.22		1.03743	0.858537
M	10.5	7.1		1.02119	0.851258
M	7.3	2.4		0.863323	0.380211
M	9.2	5.3		0.963788	0.724276
M	9.5	5.15		0.977724	0.711807
M	12.3	11.92		1.08991	1.07628
M	13.6	14.5		1.13354	1.16137
M	13.1	13.74		1.11727	1.13799
M	14.7	20		1.16732	1.30103
M	12.4	11.6		1.09342	1.06446
M	13.3	12.4		1.12385	1.09342
M	15.4	21.5		1.18752	1.33244
M	9	4.72		0.954243	0.673942
M	10	6.61		1	0.820201
M	9.5	5.15		0.977724	0.711807
M	10	6.53		1	0.814913
M	9.6	5.73		0.982271	0.758155
M	10.7	7.1		1.02938	0.851258
M	9.6	4.85		0.982271	0.685742
M	9.4	5.32		0.973128	0.725912
M	7.3	2.4		0.863323	0.380211
M	9.2	5.3		0.963788	0.724276
M	9.5	5.15		0.977724	0.711807
M	10	6.53		1	0.814913
M	9.5	5.76		0.977724	0.760422
M	9.9	5.8		0.995635	0.763428
M	9.3	4.5		0.968483	0.653213
F	13.6	15.4		1.13354	1.18752
F	14.5	18.83		1.16137	1.27485
F	13.3	12.83		1.12385	1.10823
F	12	11.42		1.07918	1.05767
F	11.2	9.6		1.04922	0.982271
F	11.7	10.5		1.06819	1.02119
F	13	12.7		1.11394	1.1038
F	9.6	4.78		0.982271	0.679428
F	11.8	10.15		1.07188	1.00647
F	9.3	5.26		0.968483	0.720986
F	10.5	7.1		1.02119	0.851258
F	10.4	7.31		1.01703	0.863917
F	10.7	8		1.02938	0.90309
F	9.9	6.5		0.995635	0.812913
F	9.7	6.35		0.986772	0.802774
F	13.1	12.9		1.11727	1.11059
F	9.4	4.75		0.973128	0.676694
F	10	6.3		1	0.799341
F	10.6	7.9		1.02531	0.897627
F	8.1	3.75		0.908485	0.574031
F	10.9	8.4		1.03743	0.924279
F	12	11.5		1.07918	1.0607
F	11.2	9.6		1.04922	0.982271
F	11.7	10.5		1.06819	1.02119
F	10.2	7		1.0086	0.845098
F	10.7	8.15		1.02938	0.911158
F	10	6.57		1	0.817565
F	10	6.31		1	0.800029
F	8.5	4.42		0.929419	0.645422
F	9	5.45		0.954243	0.736397
F	8	3.96		0.90309	0.597695
F	11.6	12.52		1.06446	1.0976
F	12.6	14		1.10037	1.14613
F	13.1	15.5		1.11727	1.19033
F	14	20		1.14613	1.30103
F	11.6	10.6		1.06446	1.02531
F	12.7	15.8		1.1038	1.19866
F	13.6	19.6		1.13354	1.29226
F	13.9	18.6		1.14301	1.26951
F	13.2	13		1.12057	1.11394
F	9.6	4.56		0.982271	0.658965
F	11.9	10.3		1.07555	1.01284
F	9.3	5.1		0.968483	0.70757
F	10.5	7.1		1.02119	0.851258
F	10.4	7.31		1.01703	0.863917
F	10.7	8		1.02938	0.90309
F	12.6	14		1.10037	1.14613
F	13.1	15.5		1.11727	1.19033
F	14	20		1.14613	1.30103
F	11.6	10.6		1.06446	1.02531
F	12.7	16.2		1.1038	1.20952
F	12.2	13.2		1.08636	1.12057
F	11.4	10.6		1.0569	1.02531
F	8.9	5.92		0.94939	0.772322
M	8.6	5.5		0.934498	0.740363
M	10.4	8.5		1.01703	0.929419
M	11.6	12		1.06446	1.07918
M	12.2	14.5		1.08636	1.16137
M	9.6	6.5		0.982271	0.812913
M	11.5	10.6		1.0607	1.02531
M	11	9		1.04139	0.954243
M	12.1	12.92		1.08279	1.11126
M	9.9	6.47		0.995635	0.810904
M	9.8	6.56		0.991226	0.816904
M	11.1	8.62		1.04532	0.935507
M	11.1	8.72		1.04532	0.940516
M	11.5	10.85		1.0607	1.03543
M	7.6	3.95		0.880814	0.596597
M	7.8	4.3		0.892095	0.633468
M	11	9.06		1.04139	0.957128
M	10.8	8.32		1.03342	0.920123
M	10.6	6.75		1.02531	0.829304
M	10.9	8.81		1.03743	0.944976
M	10.3	8.08		1.01284	0.907411
M	11.4	8.58		1.0569	0.933487
M	9.2	5.3		0.963788	0.724276
M	10	6.61		1	0.820201
M	9.5	5.15		0.977724	0.711807
M	10	6.53		1	0.814913
M	9.6	5.73		0.982271	0.758155
M	11	8.9		1.04139	0.94939
M	10.2	8		1.0086	0.90309
M	10.9	9.1		1.03743	0.959041
M	11.4	9.4		1.0569	0.973128
M	9.6	6.65		0.982271	0.822822
M	11.3	10.35		1.05308	1.01494
M	11.9	10.9		1.07555	1.03743
M	11.1	8		1.04532	0.90309
M	11.7	11.65		1.06819	1.06633
M	10.6	8.1		1.02531	0.908485
M	13.7	15.65		1.13672	1.19451
M	11.2	9.7		1.04922	0.986772
M	11.4	10.3		1.0569	1.01284
M	11.4	11		1.0569	1.04139
M	11.2	10.2		1.04922	1.0086
M	10.4	7.62		1.01703	0.881955
M	11.5	9.6		1.0607	0.982271
M	11.5	10.85		1.0607	1.03543
M	8.8	5.12		0.944483	0.70927
M	10.3	7.2		1.01284	0.857332
M	9.1	5.65		0.959041	0.752048
M	10.2	7.2		1.0086	0.857332
M	9	5.65		0.954243	0.752048
M	10.5	7.7		1.02119	0.886491
M	10.4	7.8		1.01703	0.892095
M	9	5.5		0.954243	0.740363
M	7.6	3.95		0.880814	0.596597
M	7.8	4.3		0.892095	0.633468
M	11	9.06		1.04139	0.957128
M	10.8	8.32		1.03342	0.920123
M	10.6	6.75		1.02531	0.829304
M	10.9	8.81		1.03743	0.944976
M	10.3	8.08		1.01284	0.907411
M	10.9	9.4		1.03743	0.973128
M	11.4	9.35		1.0569	0.970812
M	9.6	6.65		0.982271	0.822822
F	12.2	13.25		1.08636	1.12222
F	12.4	13.35		1.09342	1.12548
F	13.5	16.5		1.13033	1.21748
F	11.5	10.8		1.0607	1.03342
F	11.9	11.8		1.07555	1.07188
F	11.4	10.6		1.0569	1.02531
F	8.9	5.92		0.94939	0.772322
F	10	6.57		1	0.817565
F	10	6.31		1	0.800029
F	8.5	4.42		0.929419	0.645422
F	9	5.45		0.954243	0.736397
F	8	3.96		0.90309	0.597695
F	11.6	12.52		1.06446	1.0976
F	10.5	8.82		1.02119	0.945469
F	12.6	14		1.10037	1.14613
F	13.1	15.5		1.11727	1.19033
F	14	20		1.14613	1.30103
F	11.6	10.6		1.06446	1.02531
F	12.7	15.8		1.1038	1.19866
F	13.6	19.6		1.13354	1.29226
F	13.9	18.6		1.14301	1.26951
F	12.7	14.5		1.1038	1.16137
F	11.2	9.54		1.04922	0.979548
F	11.6	10.64		1.06446	1.02694
F	10.8	9.2		1.03342	0.963788
M	10.4	8.5		1.01703	0.929419
M	11.6	12		1.06446	1.07918
M	13.7	16.6		1.13672	1.22011
M	10.6	8.6		1.02531	0.934498
M	17.5	60		1.24304	1.77815
M	11.4	9.4		1.0569	0.973128
M	9.6	6.7		0.982271	0.826075
M	11.5	10.8		1.0607	1.03342
M	9.5	5.2		0.977724	0.716003
M	12.3	12.7		1.08991	1.1038
M	11.7	11.5		1.06819	1.0607
M	9.9	8.5		0.995635	0.929419
M	9.1	6.8		0.959041	0.832509
M	12.3	12.7		1.08991	1.1038
M	11.7	11.5		1.06819	1.0607
M	11.1	9.6		1.04532	0.982271
M	10.8	9.4		1.03342	0.973128
M	11.4	10.4		1.0569	1.01703
M	11.4	11		1.0569	1.04139
M	10.1	6.6		1.00432	0.819544
M	10.6	6.8		1.02531	0.832509
M	10	6.5		1	0.812913
M	11.6	12.3		1.06446	1.08991
M	10.8	8.4		1.03342	0.924279
M	8.4	4.9		0.924279	0.690196
F	10	6.5		1	0.812913
F	10	6.31		1	0.800029
F	8.5	4.42		0.929419	0.645422
F	9	5.5		0.954243	0.740363
F	8	4		0.90309	0.60206
F	11.6	12.5		1.06446	1.09691
F	12.2	13.2		1.08636	1.12057
F	13.6	19.6		1.13354	1.29226
F	13.5	16.5		1.13033	1.21748
F	8	4.1		0.90309	0.612784
F	11.5	12.5		1.0607	1.09691
F	12.1	11.4		1.08279	1.0569
F	11.2	9.9		1.04922	0.995635
F	8.9	5.9		0.94939	0.770852
F	10	6.5		1	0.812913
F	12.6	14		1.10037	1.14613
F	13.1	15.5		1.11727	1.19033
F	14	20		1.14613	1.30103
F	11.6	10.6		1.06446	1.02531
F	12.7	16.2		1.1038	1.20952
F	12.2	13.2		1.08636	1.12057
F	11.4	10.6		1.0569	1.02531
M	11.2	9.7		1.04922	0.986772
M	13	15.2		1.11394	1.18184
M	8.8	5.15		0.944483	0.711807
M	13.7	15.61		1.13672	1.1934
M	11.5	10.8		1.0607	1.03342
M	11.4	10.32		1.0569	1.01368
M	11.4	11		1.0569	1.04139
M	7.7	4		0.886491	0.60206
M	7.6	4.32		0.880814	0.635484
M	11.5	9.6		1.0607	0.982271
M	12.3	12.7		1.08991	1.1038
M	11.7	11.5		1.06819	1.0607
M	11.5	10.7		1.0607	1.02938
M	11	8.75		1.04139	0.942008
M	10.3	7.2		1.01284	0.857332
M	13.6	16.5		1.13354	1.21748
M	11.1	8.62		1.04532	0.935507
M	11.2	10.27		1.04922	1.01157
F	12.6	14		1.10037	1.14613
F	13.1	15.5		1.11727	1.19033
F	14	20		1.14613	1.30103
F	11.6	10.6		1.06446	1.02531
F	12.7	16.2		1.1038	1.20952
F	12.2	13.2		1.08636	1.12057
F	11.4	10.6		1.0569	1.02531
F	8.9	5.92		0.94939	0.772322
F	10	6.57		1	0.817565
F	10	6.31		1	0.800029
F	8.5	4.42		0.929419	0.645422
F	9	5.45		0.954243	0.736397
F	8	3.96		0.90309	0.597695
F	11.6	12.52		1.06446	1.0976
F	15.2	23.5		1.18184	1.37107
F	11.5	12.6		1.0607	1.10037
F	15	22		1.17609	1.34242
F	12	14.2		1.07918	1.15229
F	13.1	15.5		1.11727	1.19033
F	14.1	20.5		1.14922	1.31175
F	11.5	10.4		1.0607	1.01703
M	11.1	8.62		1.04532	0.935507
M	9.5	5.15		0.977724	0.711807
M	8.6	5.5		0.934498	0.740363
M	9	4.72		0.954243	0.673942
M	13.8	16.5		1.13988	1.21748
M	12	9.95		1.07918	0.997823
M	11.6	12.3		1.06446	1.08991
M	11.1	8.72		1.04532	0.940516
M	11.5	10.85		1.0607	1.03543
M	10	6.53		1	0.814913
M	9.6	5.73		0.982271	0.758155
M	10.4	8.5		1.01703	0.929419
M	11.6	12		1.06446	1.07918
M	8.6	3.95		0.934498	0.596597
M	8.8	5.12		0.944483	0.70927
M	8.6	5.5		0.934498	0.740363
M	10.4	8.5		1.01703	0.929419
M	9.6	5.45		0.982271	0.736397
M	10.7	7.1		1.02938	0.851258
M	13	15.05		1.11394	1.17754
M	14	17.28		1.14613	1.23754
M	14	16.31		1.14613	1.21245
M	12.2	13.81		1.08636	1.14019
M	12	12.49		1.07918	1.09656
M	11.2	9.7		1.04922	0.986772
M	11.4	10.3		1.0569	1.01284
F	12	11.38		1.07918	1.05614
F	11.2	9.87		1.04922	0.994317
F	11.7	10.5		1.06819	1.02119
F	10.2	7		1.0086	0.845098
F	10	6.3		1	0.799341
F	10.6	7.9		1.02531	0.897627
F	8.1	3.75		0.908485	0.574031
F	10.9	8.4		1.03743	0.924279
F	12.4	13.98		1.09342	1.14551
F	13.1	14.8		1.11727	1.17026
F	12	9.33		1.07918	0.969882
F	11.5	11		1.0607	1.04139
F	12.6	11.83		1.10037	1.07298
F	11.9	10.64		1.07555	1.02694
F	13	12.27		1.11394	1.08884
F	12.9	13.17		1.11059	1.11959
F	12.7	12.12		1.1038	1.0835
F	10.6	6.41		1.02531	0.806858
F	13	12.67		1.11394	1.10278
F	13.9	17		1.14301	1.23045
F	10.9	8.4		1.03743	0.924279
F	11.2	9.6		1.04922	0.982271
F	11.7	10.5		1.06819	1.02119
F	10.2	7		1.0086	0.845098
F	10.7	8.15		1.02938	0.911158
F	12.4	14.42		1.09342	1.15897
F	11.4	10.71		1.0569	1.02979
F	10.5	9.18		1.02119	0.962843
F	11.2	9.44		1.04922	0.974972
F	11.7	12.13		1.06819	1.08386
F	12.2	12.42		1.08636	1.09412
F	9.2	5.68		0.963788	0.754348
F	10.9	8.4		1.03743	0.924279
F	12	11.38		1.07918	1.05614
F	11.2	9.87		1.04922	0.994317
F	11.7	10.5		1.06819	1.02119
F	10.2	7		1.0086	0.845098
F	10	6.3		1	0.799341
F	10.6	7.9		1.02531	0.897627
F	8.1	3.75		0.908485	0.574031
F	10.9	8.4		1.03743	0.924279
F	11.2	9.6		1.04922	0.982271
F	11.7	10.5		1.06819	1.02119
F	10.2	7		1.0086	0.845098
F	10.7	8.15		1.02938	0.911158
M	9.2	5.3		0.963788	0.724276
M	10	6.61		1	0.820201
M	9.5	5.15		0.977724	0.711807
M	10	6.53		1	0.814913
M	9.6	5.73		0.982271	0.758155
M	10.5	7.1		1.02119	0.851258
M	9.2	4.52		0.963788	0.655138
M	9.1	4.4		0.959041	0.643453
M	12.2	11.65		1.08636	1.06633
M	11.4	8.65		1.0569	0.937016
M	7.3	2.43		0.863323	0.385606
M	9	4.72		0.954243	0.673942
M	8.6	3.95		0.934498	0.596597
M	8.6	3.95		0.934498	0.596597
M	13.6	16.45		1.13354	1.21617
M	12	9.95		1.07918	0.997823
M	9.6	5.45		0.982271	0.736397
M	10.7	7.1		1.02938	0.851258
M	9.6	4.85		0.982271	0.685742
M	9.4	5.32		0.973128	0.725912
M	12.3	11.88		1.08991	1.07482
M	13.6	14.53		1.13354	1.16227
M	13.1	13.74		1.11727	1.13799
M	14.7	20.03		1.16732	1.30168
M	12.4	11.59		1.09342	1.06408
M	13.3	12.29		1.12385	1.08955
M	13.6	13.95		1.13354	1.14457
M	9.4	5.43		0.973128	0.7348
M	9.6	4.85		0.982271	0.685742
M	9.4	5.23		0.973128	0.718502
M	11.2	9.15		1.04922	0.961421
M	12	10.5		1.07918	1.02119
M	12.3	11.6		1.08991	1.06446
M	10.9	7.22		1.03743	0.858537
M	10.5	7.1		1.02119	0.851258
M	9.2	4.52		0.963788	0.655138
M	9.1	4.4		0.959041	0.643453
M	12.2	11.65		1.08636	1.06633
M	11.4	8.65		1.0569	0.937016
M	15.4	21.5		1.18752	1.33244
M	9	4.72		0.954243	0.673942
M	8.6	3.95		0.934498	0.596597
M	13.6	16.45		1.13354	1.21617
M	12	9.95		1.07918	0.997823
M	9.6	5.45		0.982271	0.736397
M	10.7	7.1		1.02938	0.851258
M	9.6	4.85		0.982271	0.685742
M	9.4	5.32		0.973128	0.725912
M	7.3	2.4		0.863323	0.380211
M	9.2	5.3		0.963788	0.724276
M	9.5	5.15		0.977724	0.711807
M	10	6.53		1	0.814913
M	9.5	5.76		0.977724	0.760422
M	9.9	5.8		0.995635	0.763428
M	9.3	4.5		0.968483	0.653213
F	13.2	13		1.12057	1.11394
F	9.6	4.56		0.982271	0.658965
F	11.9	10.3		1.07555	1.01284
F	9.3	5.1		0.968483	0.70757
F	10.5	7.1		1.02119	0.851258
F	10.4	7.31		1.01703	0.863917
F	10.7	8		1.02938	0.90309
F	9.9	6.5		0.995635	0.812913
F	9.7	6.35		0.986772	0.802774
F	13	12.72		1.11394	1.10449
F	9.4	4.75		0.973128	0.676694
F	10	6.3		1	0.799341
F	10.6	7.9		1.02531	0.897627
F	8.1	3.75		0.908485	0.574031
F	10.9	8.4		1.03743	0.924279
F	12	11.42		1.07918	1.05767
F	11.2	9.6		1.04922	0.982271
F	11.7	10.5		1.06819	1.02119
F	10.2	7		1.0086	0.845098
F	10.7	8.15		1.02938	0.911158
M	11	8.9		1.04139	0.94939
M	10.2	8		1.0086	0.90309
M	10.9	9.1		1.03743	0.959041
M	11.4	9.4		1.0569	0.973128
M	9.6	6.65		0.982271	0.822822
M	11.3	10.35		1.05308	1.01494
M	11.9	10.9		1.07555	1.03743
M	11.1	8		1.04532	0.90309
M	11.7	11.65		1.06819	1.06633
M	10.6	8.1		1.02531	0.908485
M	13.7	15.65		1.13672	1.19451
M	11.2	9.7		1.04922	0.986772
M	11.4	10.3		1.0569	1.01284
M	11.4	11		1.0569	1.04139
M	11.2	10.2		1.04922	1.0086
M	10.4	7.62		1.01703	0.881955
M	11.5	9.6		1.0607	0.982271
M	11.5	10.85		1.0607	1.03543
M	8.8	5.12		0.944483	0.70927
M	10.3	7.2		1.01284	0.857332
M	9.1	5.65		0.959041	0.752048
M	10.2	7.2		1.0086	0.857332
M	9	5.65		0.954243	0.752048
M	10.5	7.7		1.02119	0.886491
M	10.4	7.8		1.01703	0.892095
M	9	5.5		0.954243	0.740363
M	7.6	3.95		0.880814	0.596597
M	7.8	4.3		0.892095	0.633468
M	11	9.06		1.04139	0.957128
M	10.8	8.32		1.03342	0.920123
M	10.6	6.75		1.02531	0.829304
M	10.9	8.81		1.03743	0.944976
M	10.3	8.08		1.01284	0.907411
M	10.9	9.4		1.03743	0.973128
M	11.4	9.35		1.0569	0.970812
M	9.6	6.65		0.982271	0.822822
F	12.2	13.25		1.08636	1.12222
F	12.4	13.35		1.09342	1.12548
F	13.5	16.5		1.13033	1.21748
F	11.5	10.8		1.0607	1.03342
F	11.9	11.8		1.07555	1.07188
F	11.4	10.6		1.0569	1.02531
F	8.9	5.92		0.94939	0.772322
F	10	6.57		1	0.817565
F	10	6.31		1	0.800029
F	8.5	4.42		0.929419	0.645422
F	9	5.45		0.954243	0.736397
F	8	3.96		0.90309	0.597695
F	11.6	12.52		1.06446	1.0976
F	10.5	8.82		1.02119	0.945469
F	12.6	14		1.10037	1.14613
F	13.1	15.5		1.11727	1.19033
F	14	20		1.14613	1.30103
F	11.6	10.6		1.06446	1.02531
F	12.7	15.8		1.1038	1.19866
F	13.6	19.6		1.13354	1.29226
F	13.9	18.6		1.14301	1.26951
F	12.7	14.5		1.1038	1.16137
F	11.2	9.54		1.04922	0.979548
F	11.6	10.64		1.06446	1.02694
F	10.8	9.2		1.03342	0.963788
M	8.6	5.5		0.934498	0.740363
M	10.4	8.5		1.01703	0.929419
M	11.2	9.7		1.04922	0.986772
M	13	15.2		1.11394	1.18184
M	16.2	34		1.20952	1.53148
M	17.5	60		1.24304	1.77815
M	11.4	9.35		1.0569	0.970812
M	9.6	6.65		0.982271	0.822822
M	11.5	10.8		1.0607	1.03342
M	11.4	10.32		1.0569	1.01368
M	12.3	12.7		1.08991	1.1038
M	11.7	11.5		1.06819	1.0607
M	9.9	8.5		0.995635	0.929419
M	9	6.5		0.954243	0.812913
M	12.3	12.7		1.08991	1.1038
M	11.7	11.5		1.06819	1.0607
M	10.9	9.4		1.03743	0.973128
M	10.8	9.35		1.03342	0.970812
M	11.4	10.4		1.0569	1.01703
M	11.4	11		1.0569	1.04139
M	12	12.85		1.07918	1.1089
M	10.6	6.75		1.02531	0.829304
M	10.9	8.81		1.03743	0.944976
F	12.7	16.2		1.1038	1.20952
F	12.2	13.2		1.08636	1.12057
F	12.6	14		1.10037	1.14613
F	13.1	15.5		1.11727	1.19033
F	14	20		1.14613	1.30103
F	11.6	10.6		1.06446	1.02531
F	12.7	16.2		1.1038	1.20952
F	13.6	19.6		1.13354	1.29226
F	13.5	16.5		1.13033	1.21748
F	11.5	10.8		1.0607	1.03342
F	13.9	18.6		1.14301	1.26951
F	10.8	9.2		1.03342	0.963788
F	12.7	16.2		1.1038	1.20952
F	12.2	13.2		1.08636	1.12057
F	13.9	18.6		1.14301	1.26951
F	10.8	9.2		1.03342	0.963788
F	10	6.65		1	0.822822
F	10	6.3		1	0.799341
F	12	14.2		1.07918	1.15229
F	13.1	15.5		1.11727	1.19033
F	11.2	9.6		1.04922	0.982271
F	11.7	10.5		1.06819	1.02119
M	14	16.3		1.14613	1.21219
M	11.5	9.2		1.0607	0.963788
M	11.5	10.3		1.0607	1.01284
M	13	15.05		1.11394	1.17754
M	16.2	34		1.20952	1.53148
M	17.5	60		1.24304	1.77815
M	11.5	12.5		1.0607	1.09691
M	10.1	7		1.00432	0.845098
M	9.9	8.5		0.995635	0.929419
M	9	6.5		0.954243	0.812913
M	8.6	5.5		0.934498	0.740363
M	10.4	8.5		1.01703	0.929419
M	11.6	12		1.06446	1.07918
M	12.2	14.5		1.08636	1.16137
M	9.6	6.5		0.982271	0.812913
M	11.5	10.6		1.0607	1.02531
M	11	9		1.04139	0.954243
M	12	12.85		1.07918	1.1089
M	10.6	6.75		1.02531	0.829304
M	10.9	8.81		1.03743	0.944976
M	10.4	7.8		1.01703	0.892095
M	10.9	9.4		1.03743	0.973128
M	14	17.28		1.14613	1.23754
M	14	16.31		1.14613	1.21245
M	12.2	12.95		1.08636	1.11227
M	12.6	12.21		1.10037	1.08672
F	11.5	11		1.0607	1.04139
F	12.6	11.85		1.10037	1.07372
F	20	66.5		1.30103	1.82282
F	12.7	14.5		1.1038	1.16137
F	8	4		0.90309	0.60206
F	11.5	12.5		1.0607	1.09691
F	15.2	23.5		1.18184	1.37107
F	12.6	14		1.10037	1.14613
F	13.1	15.5		1.11727	1.19033
F	14	20		1.14613	1.30103
F	11.6	10.6		1.06446	1.02531
F	12.7	16.2		1.1038	1.20952
F	12.2	13.2		1.08636	1.12057
F	13.6	19.6		1.13354	1.29226
F	13.5	16.5		1.13033	1.21748
F	11.5	10.8		1.0607	1.03342
F	13.9	18.6		1.14301	1.26951
F	10.8	9.2		1.03342	0.963788
F	10.5	8.82		1.02119	0.945469
F	10	6.5		1	0.812913
F	12	11.38		1.07918	1.05614
F	11.2	9.87		1.04922	0.994317
F	11.7	10.5		1.06819	1.02119
F	13.1	12.8		1.11727	1.10721
F	13.9	17		1.14301	1.23045
F	10.9	8.4		1.03743	0.924279
F	10.2	7		1.0086	0.845098
F	10	6.3		1	0.799341
F	10.6	7.9		1.02531	0.897627
F	12.5	12.08		1.09691	1.08207
F	12	10.18		1.07918	1.00775
F	9.7	5.68		0.986772	0.754348
F	12.9	13.17		1.11059	1.11959
F	12.7	12.12		1.1038	1.0835
F	10.6	6.41		1.02531	0.806858
F	13	12.67		1.11394	1.10278
F	13.9	17		1.14301	1.23045
F	12.2	10.1		1.08636	1.00432
F	12	11.38		1.07918	1.05614
F	11.2	9.87		1.04922	0.994317
F	11.7	10.5		1.06819	1.02119
F	13.5	15.23		1.13033	1.1827
F	14.5	18.83		1.16137	1.27485
F	13.3	12.83		1.12385	1.10823
F	12	11.42		1.07918	1.05767
F	11.2	9.6		1.04922	0.982271
F	11.7	10.5		1.06819	1.02119
F	10.2	7		1.0086	0.845098
F	10.7	8.15		1.02938	0.911158
F	10.7	8.3		1.02938	0.919078
F	13	12.7		1.11394	1.1038
F	9.6	4.78		0.982271	0.679428
F	11.8	10.15		1.07188	1.00647
F	9.3	5.26		0.968483	0.720986
F	10.5	6.84		1.02119	0.835056
F	8.1	3.75		0.908485	0.574031
F	10.9	8.4		1.03743	0.924279
F	12.5	14.2		1.09691	1.15229
M	13	15		1.11394	1.17609
M	12.3	11.88		1.08991	1.07482
M	13.6	14.53		1.13354	1.16227
M	13.1	13.74		1.11727	1.13799
M	14.7	20.03		1.16732	1.30168
M	12.4	11.59		1.09342	1.06408
M	13.3	12.29		1.12385	1.08955
M	10	6.5		1	0.812913
M	9.6	5.75		0.982271	0.759668
M	10.5	7.1		1.02119	0.851258
M	9.2	4.52		0.963788	0.655138
M	9.1	4.4		0.959041	0.643453
M	12.2	11.65		1.08636	1.06633
M	11.4	8.65		1.0569	0.937016
M	15.4	21.5		1.18752	1.33244
M	9	4.72		0.954243	0.673942
M	8.6	3.95		0.934498	0.596597
M	13.6	16.45		1.13354	1.21617
M	12	9.95		1.07918	0.997823
M	11.2	9.04		1.04922	0.956168
M	12	10.5		1.07918	1.02119
M	12.2	11.54		1.08636	1.06221
M	10.9	7.22		1.03743	0.858537
M	10.7	7.1		1.02938	0.851258
M	9.4	5.43		0.973128	0.7348
M	9.6	4.85		0.982271	0.685742
M	9.4	5.23		0.973128	0.718502
M	7.3	2.43		0.863323	0.385606
M	12.4	11.59		1.09342	1.06408
M	13.3	12.29		1.12385	1.08955
M	13.6	13.95		1.13354	1.14457
M	9.4	5.43		0.973128	0.7348
M	12.4	10.99		1.09342	1.041
M	10.6	7.73		1.02531	0.888179
M	10.5	7.1		1.02119	0.851258
M	9.2	4.52		0.963788	0.655138
M	15.4	21		1.18752	1.32222
M	9	4.72		0.954243	0.673942
M	8.6	3.95		0.934498	0.596597
M	13.6	16.6		1.13354	1.22011
M	12	9.95		1.07918	0.997823
M	11.2	9.04		1.04922	0.956168
M	12	10.5		1.07918	1.02119
M	12.5	12		1.09691	1.07918
M	10.9	7.22		1.03743	0.858537
M	10.5	6.96		1.02119	0.842609
M	8.9	4.44		0.94939	0.647383
M	9.1	4.59		0.959041	0.661813
M	12.2	11.5		1.08636	1.0607
M	11.4	8.6		1.0569	0.934498
M	9.2	5.3		0.963788	0.724276
M	9.2	4.52		0.963788	0.655138
M	9.1	4.4		0.959041	0.643453
M	12.2	11.65		1.08636	1.06633
M	11.4	8.65		1.0569	0.937016
M	9.9	5.8		0.995635	0.763428
M	9.3	4.5		0.968483	0.653213
M	9.6	5.45		0.982271	0.736397
M	10.7	7.1		1.02938	0.851258
M	9.4	5.3		0.973128	0.724276
M	9.6	4.85		0.982271	0.685742
M	9.4	5.2		0.973128	0.716003
M	7.3	2.4		0.863323	0.380211
F	13.2	13		1.12057	1.11394
F	9.6	4.56		0.982271	0.658965
F	11.9	10.3		1.07555	1.01284
F	9.3	5.1		0.968483	0.70757
F	10.9	8.4		1.03743	0.924279
F	12	11.38		1.07918	1.05614
F	11.2	9.87		1.04922	0.994317
F	11.7	10.5		1.06819	1.02119
F	10.2	7		1.0086	0.845098
F	10.7	8.15		1.02938	0.911158
F	12.5	12.08		1.09691	1.08207
F	12	10.18		1.07918	1.00775
F	9.7	5.68		0.986772	0.754348
F	12.9	13.2		1.11059	1.12057
F	10.5	6.84		1.02119	0.835056
F	10.4	7.28		1.01703	0.862131
F	10.7	7.98		1.02938	0.902003
F	9.9	6.51		0.995635	0.813581
F	9.7	6.47		0.986772	0.810904
F	13	12.69		1.11394	1.10346
F	9.4	4.77		0.973128	0.678518
F	10	6.24		1	0.795185
F	10.6	7.98		1.02531	0.902003
F	8.1	3.84		0.908485	0.584331
F	13	12.7		1.11394	1.1038
F	9.6	4.78		0.982271	0.679428
F	11.8	10.15		1.07188	1.00647
F	9.3	5.26		0.968483	0.720986
F	10.5	6.84		1.02119	0.835056
F	10.6	6.41		1.02531	0.806858
F	13	12.67		1.11394	1.10278
F	13.9	17		1.14301	1.23045
F	11.5	10.8		1.0607	1.03342
F	12.4	14.1		1.09342	1.14922
F	10.7	9.88		1.02938	0.994757
F	10.4	8.33		1.01703	0.920645
F	12.4	14.42		1.09342	1.15897
F	11.4	10.71		1.0569	1.02979
F	10.5	9.18		1.02119	0.962843
F	11.2	9.44		1.04922	0.974972
F	11.7	12.13		1.06819	1.08386
F	12.2	12.42		1.08636	1.09412
F	9.2	5.68		0.963788	0.754348
F	8	3.43		0.90309	0.535294
F	9.9	7.04		0.995635	0.847573
F	10.3	7.16		1.01284	0.854913
F	13.2	13		1.12057	1.11394
F	9.6	4.56		0.982271	0.658965
F	11.9	10.3		1.07555	1.01284
F	9.3	5.1		0.968483	0.70757
F	10.5	7.1		1.02119	0.851258
F	10.4	7.31		1.01703	0.863917
F	10.7	8		1.02938	0.90309
F	9.9	6.5		0.995635	0.812913
F	9.7	6.35		0.986772	0.802774
F	13	12.72		1.11394	1.10449
F	9.4	4.75		0.973128	0.676694
F	9.3	5.26		0.968483	0.720986
F	10.5	6.84		1.02119	0.835056
F	10.4	7.28		1.01703	0.862131
F	10.7	7.98		1.02938	0.902003
F	9.9	6.51		0.995635	0.813581
F	11.2	9.6		1.04922	0.982271
F	11.7	10.5		1.06819	1.02119
F	10.2	7		1.0086	0.845098
F	10.7	8.15		1.02938	0.911158
M	12.6	15.74		1.10037	1.197
M	12.7	13.96		1.1038	1.14489
M	11.41	10.72		1.05729	1.03019
M	12.3	13.37		1.08991	1.12613
M	10.1	8.33		1.00432	0.920645
M	8.9	5.34		0.94939	0.727541
M	11.2	9.76		1.04922	0.98945
M	12.5	14.35		1.09691	1.15685
M	12	12.46		1.07918	1.09552
M	11.6	11.39		1.06446	1.05652
M	11.6	12.3		1.06446	1.08991
M	12.2	13.81		1.08636	1.14019
M	12	12.49		1.07918	1.09656
M	9.5	6.05		0.977724	0.781755
M	11.2	9.7		1.04922	0.986772
M	11.4	10.3		1.0569	1.01284
M	11.4	11		1.0569	1.04139
M	11.2	10.2		1.04922	1.0086
M	10.4	7.62		1.01703	0.881955
M	11.5	9.6		1.0607	0.982271
M	11.5	10.85		1.0607	1.03543
M	8.8	5.12		0.944483	0.70927
M	10.3	7.2		1.01284	0.857332
M	9.1	5.65		0.959041	0.752048
M	10.2	7.2		1.0086	0.857332
M	9	5.65		0.954243	0.752048
M	10.5	7.7		1.02119	0.886491
M	10.4	7.8		1.01703	0.892095
M	9	5.5		0.954243	0.740363
M	7.6	3.95		0.880814	0.596597
M	7.8	4.3		0.892095	0.633468
M	6.4	3.8		0.80618	0.579784
M	11	9.06		1.04139	0.957128
M	10.8	8.32		1.03342	0.920123
M	10.6	6.75		1.02531	0.829304
M	10.9	8.81		1.03743	0.944976
M	10.3	8.08		1.01284	0.907411
M	10.9	9.4		1.03743	0.973128
M	11.4	9.35		1.0569	0.970812
M	9.6	6.65		0.982271	0.822822
M	11.3	10.35		1.05308	1.01494
M	11.9	10.87		1.07555	1.03623
M	11.1	8.03		1.04532	0.904716
M	11.7	11.68		1.06819	1.06744
M	11.6	10.78		1.06446	1.03262
M	11	8.75		1.04139	0.942008
M	10.3	7.43		1.01284	0.870989
M	13.8	16.75		1.13988	1.22401
M	9.5	5.75		0.977724	0.759668
M	11.2	10.27		1.04922	1.01157
M	11.2	9.7		1.04922	0.986772
M	13	15.2		1.11394	1.18184
M	10.6	8.08		1.02531	0.907411
M	13.7	15.61		1.13672	1.1934
M	11.2	9.73		1.04922	0.988113
M	11.4	10.32		1.0569	1.01368
M	11.4	11		1.0569	1.04139
M	11.2	10.2		1.04922	1.0086
M	10.4	7.62		1.01703	0.881955
M	11.5	9.6		1.0607	0.982271
M	12.3	12.7		1.08991	1.1038
M	14	16.15		1.14613	1.20817
M	10.7	8.45		1.02938	0.926857
M	12.1	12.92		1.08279	1.11126
M	9.9	6.47		0.995635	0.810904
M	9.8	6.56		0.991226	0.816904
M	11.1	8.62		1.04532	0.935507
M	11.1	8.72		1.04532	0.940516
M	11.5	10.85		1.0607	1.03543
M	8.8	5.12		0.944483	0.70927
M	10.3	7.18		1.01284	0.856124
M	9.1	5.62		0.959041	0.749736
M	10.5	7.67		1.02119	0.884795
M	10.4	7.72		1.01703	0.887617
M	9	5.24		0.954243	0.719331
M	7.7	3.92		0.886491	0.593286
M	7.6	4.22		0.880814	0.625312
F	11.6	12.47		1.06446	1.09587
F	15.1	23.1		1.17898	1.36361
F	12.7	14.14		1.1038	1.15045
F	13	15.24		1.11394	1.18298
F	14	20		1.14613	1.30103
F	11.5	10.43		1.0607	1.01828
F	12.7	15.56		1.1038	1.19201
F	13.8	19.52		1.13988	1.29048
F	13.9	18.6		1.14301	1.26951
F	12.7	14.5		1.1038	1.16137
F	11.2	9.54		1.04922	0.979548
F	11.6	10.64		1.06446	1.02694
F	12.2	13.26		1.08636	1.12254
F	12.4	13.35		1.09342	1.12548
F	13.5	16.61		1.13033	1.22037
F	11.5	10.8		1.0607	1.03342
F	11.9	11.8		1.07555	1.07188
F	11.4	10.6		1.0569	1.02531
F	10.8	9.05		1.03342	0.956649
F	10.8	8.75		1.03342	0.942008
F	8.9	5.92		0.94939	0.772322
F	10	6.57		1	0.817565
F	10	6.31		1	0.800029
F	8.5	4.42		0.929419	0.645422
F	9	5.45		0.954243	0.736397
F	8	3.96		0.90309	0.597695
M	10.4	8.5		1.01703	0.929419
M	11.6	12		1.06446	1.07918
M	7.4	3.6		0.869232	0.556303
M	8.2	4.9		0.913814	0.690196
M	9.8	6.4		0.991226	0.80618
M	8.2	4.7		0.913814	0.672098
M	11	11.2		1.04139	1.04922
M	13.6	16.5		1.13354	1.21748
M	10.9	8.4		1.03743	0.924279
M	11	10		1.04139	1
M	8.9	6		0.94939	0.778151
M	8.5	5.4		0.929419	0.732394
M	10.9	9.4		1.03743	0.973128
M	10.2	9		1.0086	0.954243
M	11.4	10.4		1.0569	1.01703
M	11.4	11		1.0569	1.04139
M	11.8	12.4		1.07188	1.09342
M	9.1	6.6		0.959041	0.819544
M	10.6	8.6		1.02531	0.934498
M	11.2	9.7		1.04922	0.986772
M	12.7	14.6		1.1038	1.16435
M	16.2	34		1.20952	1.53148
M	17.5	60		1.24304	1.77815
M	10.2	9.1		1.0086	0.959041
M	9	6.2		0.954243	0.792392
M	11.5	10.8		1.0607	1.03342
M	11.1	10		1.04532	1
M	12.3	12.7		1.08991	1.1038
M	11.7	11.5		1.06819	1.0607
M	9.9	8.5		0.995635	0.929419
M	9	6.5		0.954243	0.812913
M	12.3	12.7		1.08991	1.1038
M	11.7	11.5		1.06819	1.0607
F	11.7	10.5		1.06819	1.02119
F	9	6.2		0.954243	0.792392
F	8.4	4.4		0.924279	0.643453
F	9	5.5		0.954243	0.740363
F	8	4		0.90309	0.60206
F	11.6	12.5		1.06446	1.09691
F	12.2	13.2		1.08636	1.12057
F	13.6	19.5		1.13354	1.29003
F	12.2	13.2		1.08636	1.12057
F	12.6	14		1.10037	1.14613
F	13.1	15.5		1.11727	1.19033
F	14	20		1.14613	1.30103
F	11.6	10.6		1.06446	1.02531
F	12.7	16.2		1.1038	1.20952
F	13.6	19.6		1.13354	1.29226
F	13	16.2		1.11394	1.20952
F	11.5	10.8		1.0607	1.03342
F	13.9	18.6		1.14301	1.26951
F	10.8	9.2		1.03342	0.963788
F	12.5	16.2		1.09691	1.20952
F	12.2	13.2		1.08636	1.12057
F	13.7	18.4		1.13672	1.26482
F	10.8	9.2		1.03342	0.963788
F	10	6.65		1	0.822822
F	10	6.3		1	0.799341
F	12	14.2		1.07918	1.15229
F	13.1	15.5		1.11727	1.19033
F	11.2	9.6		1.04922	0.982271
M	16.2	34		1.20952	1.53148
M	17.5	60		1.24304	1.77815
M	11.5	12.5		1.0607	1.09691
M	10.1	7		1.00432	0.845098
M	9.9	8.5		0.995635	0.929419
M	9	6.5		0.954243	0.812913
M	8.6	5.5		0.934498	0.740363
M	10.4	8.5		1.01703	0.929419
M	11.6	12		1.06446	1.07918
M	12.2	14.5		1.08636	1.16137
M	9.6	6.5		0.982271	0.812913
M	11.5	10.6		1.0607	1.02531
M	11	9		1.04139	0.954243
M	12	12.85		1.07918	1.1089
M	10.6	6.75		1.02531	0.829304
M	10.9	8.81		1.03743	0.944976
M	10.4	7.8		1.01703	0.892095
M	10.9	9.4		1.03743	0.973128
M	11.4	9.35		1.0569	0.970812
M	9.6	6.65		0.982271	0.822822
M	14	16.15		1.14613	1.20817
F	20	66.5		1.30103	1.82282
F	12.7	14.5		1.1038	1.16137
F	8	4		0.90309	0.60206
F	11.5	12.5		1.0607	1.09691
F	15.2	23.5		1.18184	1.37107
F	12.6	14		1.10037	1.14613
F	13.1	15.5		1.11727	1.19033
F	14	20		1.14613	1.30103
F	11.6	10.6		1.06446	1.02531
F	12.7	16.2		1.1038	1.20952
F	12.2	13.2		1.08636	1.12057
F	13.6	19.6		1.13354	1.29226
F	13.5	16.5		1.13033	1.21748
F	11.5	10.8		1.0607	1.03342
F	13.9	18.6		1.14301	1.26951
F	10.8	9.2		1.03342	0.963788
F	10.5	8.82		1.02119	0.945469
F	10	6.5		1	0.812913
F	11	9.5		1.04139	0.977724
M	14	16.3		1.14613	1.21219
M	11.5	9.2		1.0607	0.963788
M	11.5	10.3		1.0607	1.01284
M	13	15.05		1.11394	1.17754
M	14	17.28		1.14613	1.23754
M	14	16.31		1.14613	1.21245
M	12.2	12.95		1.08636	1.11227
M	12.6	12.21		1.10037	1.08672
M	13	15.45		1.11394	1.18893
M	13.5	14.75		1.13033	1.16879
M	9.7	5.77		0.986772	0.761176
M	13.2	14.52		1.12057	1.16197
M	11.3	8.84		1.05308	0.946452
M	9.8	6.56		0.991226	0.816904
M	11.1	8.62		1.04532	0.935507
M	11.1	8.72		1.04532	0.940516
M	11.5	10.85		1.0607	1.03543
M	8.8	5.12		0.944483	0.70927
M	8.6	5.5		0.934498	0.740363
M	10.4	8.5		1.01703	0.929419
M	11.6	12		1.06446	1.07918
M	12.2	14.5		1.08636	1.16137
M	9.6	6.5		0.982271	0.812913
F	17.6	32.92		1.24551	1.51746
F	16	25.38		1.20412	1.40449
F	14	16.29		1.14613	1.21192
F	13.7	15.58		1.13672	1.19257
F	14.5	18.99		1.16137	1.27852
F	14.5	20		1.16137	1.30103
F	13.4	15.31		1.1271	1.18498
F	14.5	18.39		1.16137	1.26458
F	13.3	14.3		1.12385	1.15534
F	12.4	13.98		1.09342	1.14551
F	13.1	14.8		1.11727	1.17026
F	12	9.33		1.07918	0.969882
F	11.5	11		1.0607	1.04139
F	12.6	11.83		1.10037	1.07298
F	11.9	10.64		1.07555	1.02694
F	13	12.27		1.11394	1.08884
F	10.6	8.27		1.02531	0.917506
F	9.5	4.57		0.977724	0.659916
F	12	11.42		1.07918	1.05767
F	11.2	9.6		1.04922	0.982271
F	11.7	10.5		1.06819	1.02119
F	10.2	7		1.0086	0.845098
F	10.7	8.15		1.02938	0.911158
F	10.5	9.18		1.02119	0.962843
F	11.2	9.44		1.04922	0.974972
F	11.7	12.13		1.06819	1.08386
F	12.2	12.42		1.08636	1.09412
F	9.2	5.68		0.963788	0.754348
F	10.9	8.4		1.03743	0.924279
F	12.2	13.25		1.08636	1.12222
F	12.4	13.35		1.09342	1.12548
F	13.5	16.5		1.13033	1.21748
F	11.5	10.8		1.0607	1.03342
F	11.9	11.8		1.07555	1.07188
F	11.4	10.6		1.0569	1.02531
F	12.5	12.08		1.09691	1.08207
F	12	10.18		1.07918	1.00775
F	9.7	5.68		0.986772	0.754348
F	12.9	13.17		1.11059	1.11959
F	12.7	12.12		1.1038	1.0835
F	10.6	6.41		1.02531	0.806858
F	13	12.67		1.11394	1.10278
F	13.9	17		1.14301	1.23045
F	12.2	10.1		1.08636	1.00432
F	13.5	15.23		1.13033	1.1827
F	14.5	18.83		1.16137	1.27485
F	13.3	12.83		1.12385	1.10823
F	12	11.42		1.07918	1.05767
F	11.2	9.6		1.04922	0.982271
F	11.7	10.5		1.06819	1.02119
F	10.2	7		1.0086	0.845098
F	10.7	8.15		1.02938	0.911158
F	10.7	8.3		1.02938	0.919078
F	13	12.7		1.11394	1.1038
F	9.6	4.78		0.982271	0.679428
F	11.8	10.15		1.07188	1.00647
F	9.3	5.26		0.968483	0.720986
F	10.5	6.84		1.02119	0.835056
M	12.3	11.88		1.08991	1.07482
M	13.6	14.53		1.13354	1.16227
M	13.1	13.74		1.11727	1.13799
M	14.7	20.03		1.16732	1.30168
M	12.4	11.59		1.09342	1.06408
M	13.3	12.29		1.12385	1.08955
M	13.6	13.95		1.13354	1.14457
M	13.7	15.18		1.13672	1.18127
M	12.7	11.11		1.1038	1.04571
M	14.5	17.33		1.16137	1.2388
M	12.4	10.99		1.09342	1.041
M	10.6	7.73		1.02531	0.888179
M	10.5	7.1		1.02119	0.851258
M	9.2	4.52		0.963788	0.655138
M	9.1	4.4		0.959041	0.643453
M	12.2	11.65		1.08636	1.06633
M	11.4	8.65		1.0569	0.937016
M	7.3	2.43		0.863323	0.385606
M	9	4.72		0.954243	0.673942
M	8.6	3.95		0.934498	0.596597
M	13.6	16.45		1.13354	1.21617
M	12	9.95		1.07918	0.997823
M	11.2	9.04		1.04922	0.956168
M	12	10.5		1.07918	1.02119
M	12.2	11.54		1.08636	1.06221
M	10.9	7.22		1.03743	0.858537
M	10.7	7.1		1.02938	0.851258
M	9.4	5.43		0.973128	0.7348
M	9.6	4.85		0.982271	0.685742
M	9.4	5.23		0.973128	0.718502
M	15.2	21.18		1.18184	1.32593
M	9	4.72		0.954243	0.673942
M	8.6	3.95		0.934498	0.596597
M	13.6	16.45		1.13354	1.21617
M	12	9.95		1.07918	0.997823
M	11.2	9.04		1.04922	0.956168
M	12	10.5		1.07918	1.02119
M	12.2	11.54		1.08636	1.06221
M	10.9	7.22		1.03743	0.858537
M	10.5	6.96		1.02119	0.842609
M	8.9	4.44		0.94939	0.647383
M	9.1	4.59		0.959041	0.661813
M	12.2	11.65		1.08636	1.06633
M	11.4	8.58		1.0569	0.933487
M	9.2	5.3		0.963788	0.724276
M	10	6.61		1	0.820201
M	9.5	5.15		0.977724	0.711807
M	10	6.53		1	0.814913
M	9.6	5.73		0.982271	0.758155
M	9.9	5.8		0.995635	0.763428
M	9.3	4.5		0.968483	0.653213
M	9.6	5.45		0.982271	0.736397
M	10.7	7.1		1.02938	0.851258
M	9.4	5.43		0.973128	0.7348
M	9.6	4.85		0.982271	0.685742
M	9.4	5.23		0.973128	0.718502
M	7.3	2.43		0.863323	0.385606
F	10.9	8.4		1.03743	0.924279
F	12	11.38		1.07918	1.05614
F	11.2	9.87		1.04922	0.994317
F	11.7	10.5		1.06819	1.02119
F	10.2	7		1.0086	0.845098
F	10.7	8.15		1.02938	0.911158
F	13	12.7		1.11394	1.1038
F	9.6	4.78		0.982271	0.679428
F	11.8	10.15		1.07188	1.00647
F	9.3	5.26		0.968483	0.720986
F	10.5	6.84		1.02119	0.835056
F	10.4	7.28		1.01703	0.862131
F	10.7	7.98		1.02938	0.902003
F	9.9	6.51		0.995635	0.813581
F	9.7	6.47		0.986772	0.810904
F	13	12.69		1.11394	1.10346
F	9.4	4.77		0.973128	0.678518
F	10	6.24		1	0.795185
F	10.6	7.98		1.02531	0.902003
F	8.1	3.84		0.908485	0.584331
M	11	9.06		1.04139	0.957128
M	10.8	8.32		1.03342	0.920123
M	10.6	6.75		1.02531	0.829304
M	10.9	8.81		1.03743	0.944976
M	10.3	8.08		1.01284	0.907411
M	10.9	9.4		1.03743	0.973128
M	11.4	9.35		1.0569	0.970812
M	9.6	6.65		0.982271	0.822822
M	11.3	10.35		1.05308	1.01494
M	11.9	10.87		1.07555	1.03623
M	11.1	8.03		1.04532	0.904716
M	11.7	11.68		1.06819	1.06744
M	11.6	10.78		1.06446	1.03262
M	11	8.75		1.04139	0.942008
M	10.3	7.43		1.01284	0.870989
M	13.8	16.75		1.13988	1.22401
M	9.5	5.75		0.977724	0.759668
M	11.2	10.27		1.04922	1.01157
M	11.2	9.7		1.04922	0.986772
M	13	15.2		1.11394	1.18184
M	10.6	8.08		1.02531	0.907411
M	13.7	15.61		1.13672	1.1934
M	11.2	9.73		1.04922	0.988113
M	11.4	10.32		1.0569	1.01368
M	11.4	11		1.0569	1.04139
M	11.2	10.2		1.04922	1.0086
M	10.4	7.62		1.01703	0.881955
M	11.5	9.6		1.0607	0.982271
M	12.3	12.7		1.08991	1.1038
M	14	16.15		1.14613	1.20817
M	10.7	8.45		1.02938	0.926857
M	12.1	12.92		1.08279	1.11126
M	9.9	6.47		0.995635	0.810904
M	9.8	6.56		0.991226	0.816904
M	11.1	8.62		1.04532	0.935507
M	11.1	8.72		1.04532	0.940516
M	11.5	10.85		1.0607	1.03543
M	8.8	5.12		0.944483	0.70927
M	10.3	7.18		1.01284	0.856124
M	9.1	5.62		0.959041	0.749736
M	10.5	7.67		1.02119	0.884795
M	10.4	7.72		1.01703	0.887617
M	9	5.24		0.954243	0.719331
M	7.7	3.92		0.886491	0.593286
M	7.6	4.22		0.880814	0.625312
F	11.6	12.47		1.06446	1.09587
F	15.1	23.1		1.17898	1.36361
F	12.7	14.14		1.1038	1.15045
F	13	15.24		1.11394	1.18298
F	14	20		1.14613	1.30103
F	11.5	10.43		1.0607	1.01828
F	12.7	15.56		1.1038	1.19201
F	13.8	19.52		1.13988	1.29048
F	13.9	18.6		1.14301	1.26951
F	12.7	14.5		1.1038	1.16137
F	11.2	9.54		1.04922	0.979548
F	11.6	10.64		1.06446	1.02694
F	12.2	13.26		1.08636	1.12254
F	12.4	13.35		1.09342	1.12548
F	13.5	16.61		1.13033	1.22037
F	11.5	10.8		1.0607	1.03342
F	11.9	11.8		1.07555	1.07188
F	11.4	10.6		1.0569	1.02531
F	10.8	9.05		1.03342	0.956649
F	10.8	8.75		1.03342	0.942008
F	8.9	5.92		0.94939	0.772322
F	10	6.57		1	0.817565
F	10	6.31		1	0.800029
F	8.5	4.42		0.929419	0.645422
F	9	5.45		0.954243	0.736397
F	8	3.96		0.90309	0.597695
				1.30103	1.82282

## Sheet: female
Sex	Wt.(gm)	TL (cm)			LOG TL	LOG W		K
F	16.2	12.7			1.1038	1.20952		0.790868
F	13.2	12.2			1.08636	1.12057		0.726933
F	14	12.6			1.10037	1.14613		0.699868
F	15.5	13.1			1.11727	1.19033		0.689474
F	20	14			1.14613	1.30103		0.728863
F	10.6	11.6			1.06446	1.02531		0.679097
F	16.2	12.7			1.1038	1.20952		0.790868
F	19.6	13.6			1.13354	1.29226		0.779183
F	16.2	13			1.11394	1.20952		0.737369
F	10.8	11.5			1.0607	1.03342		0.710118
F	18.6	13.9			1.14301	1.26951		0.692578
F	9.2	10.8			1.03342	0.963788		0.730326
F	16.2	12.5			1.09691	1.20952		0.82944
F	13.2	12.2			1.08636	1.12057		0.726933
F	18.4	13.7			1.13672	1.26482		0.715577
F	9.2	10.8			1.03342	0.963788		0.730326
F	6.65	10			1	0.822822		0.665
F	6.3	10			1	0.799341		0.63			a'	-2.108
F	14.2	12			1.07918	1.15229		0.821759			b	2.946
F	15.5	13.1			1.11727	1.19033		0.689474			a	0.0077983
F	9.6	11.2			1.04922	0.982271		0.683309			a range	0.00685632	0.00885518
F	10.5	11.7			1.06819	1.02119		0.655589
F	6.2	9			0.954243	0.792392		0.85048
F	4.4	8.4			0.924279	0.643453		0.74236		SUMMARY OUTPUT
F	5.5	9			0.954243	0.740363		0.754458
F	4	8			0.90309	0.60206		0.78125		Regression Statistics
F	12.5	11.6			1.06446	1.09691		0.800822		Multiple R	0.976262
F	13.2	12.2			1.08636	1.12057		0.726933		R Square	0.953088
F	19.5	13.6			1.13354	1.29003		0.775207		Adjusted R Square	0.95301
F	6.5	10			1	0.812913		0.65		Standard Error	0.0433757
F	14	12.6			1.10037	1.14613		0.699868		Observations	599
F	15.5	13.1			1.11727	1.19033		0.689474
F	20	14			1.14613	1.30103		0.728863		ANOVA
F	10.6	11.6			1.06446	1.02531		0.679097			df	SS	MS	F	Significance F
F	16.2	12.7			1.1038	1.20952		0.790868		Regression	1	22.8202	22.8202	12129.1	0
F	13.2	12.2			1.08636	1.12057		0.726933		Residual	597	1.12323	0.00188145
F	10.6	11.4			1.0569	1.02531		0.71547		Total	598	23.9435
F	5.9	8.9			0.94939	0.770852		0.836916
F	6.5	10			1	0.812913		0.65			Coefficients	Standard Error	t Stat	P-value	Lower 95%	Upper 95%	Lower 95.0%	Upper 95.0%
F	6.31	10			1	0.800029		0.631		Intercept	-2.10836	0.0282864	-74.5361	1.34767e-304	-2.16391	-2.0528	-2.16391	-2.0528
F	4.42	8.5			0.929419	0.645422		0.719723		X Variable 1	2.94608	0.0267504	110.132	0	2.89354	2.99861	2.89354	2.99861
F	5.5	9			0.954243	0.740363		0.754458
F	4	8			0.90309	0.60206		0.78125
F	12.5	11.6			1.06446	1.09691		0.800822
F	13.2	12.2			1.08636	1.12057		0.726933
F	19.6	13.6			1.13354	1.29226		0.779183
F	16.5	13.5			1.13033	1.21748		0.670629
F	4.1	8			0.90309	0.612784		0.800781
F	12.5	11.5			1.0607	1.09691		0.821895
F	11.4	12.1			1.08279	1.0569		0.6435
F	9.9	11.2			1.04922	0.995635		0.704662
F	6.5	10			1	0.812913		0.65
F	14	12.6			1.10037	1.14613		0.699868
F	15.5	13.1			1.11727	1.19033		0.689474
F	20	14			1.14613	1.30103		0.728863
F	10.6	11.6			1.06446	1.02531		0.679097
F	16.2	12.7			1.1038	1.20952		0.790868
F	13.2	12.2			1.08636	1.12057		0.726933
F	10.6	11.4			1.0569	1.02531		0.71547
F	5.92	8.9			0.94939	0.772322		0.839753
F	6.57	10			1	0.817565		0.657
F	6.31	10			1	0.800029		0.631
F	4.42	8.5			0.929419	0.645422		0.719723
F	5.45	9			0.954243	0.736397		0.747599
F	3.96	8			0.90309	0.597695		0.773438
F	12.52	11.6			1.06446	1.0976		0.802103
F	13.2	12.2			1.08636	1.12057		0.726933
F	19.6	13.6			1.13354	1.29226		0.779183
F	16.5	13.5			1.13033	1.21748		0.670629
F	4.1	8			0.90309	0.612784		0.800781
F	12.5	11.5			1.0607	1.09691		0.821895
F	11.42	12.1			1.08279	1.05767		0.644629
F	9.9	11.2			1.04922	0.995635		0.704662
F	14	12.4			1.09342	1.14613		0.734282
F	14.8	13.1			1.11727	1.17026		0.658336
F	6.4	10.6			1.02531	0.80618		0.537356
F	14	12.6			1.10037	1.14613		0.699868
F	15.5	13.1			1.11727	1.19033		0.689474
F	20	14			1.14613	1.30103		0.728863
F	10.6	11.6			1.06446	1.02531		0.679097
F	16.2	12.7			1.1038	1.20952		0.790868
F	13.2	12.2			1.08636	1.12057		0.726933
F	10.6	11.4			1.0569	1.02531		0.71547
F	5.92	8.9			0.94939	0.772322		0.839753
F	6.57	10			1	0.817565		0.657
F	6.31	10			1	0.800029		0.631
F	4.42	8.5			0.929419	0.645422		0.719723
F	5.45	9			0.954243	0.736397		0.747599
F	3.96	8			0.90309	0.597695		0.773438
F	12.52	11.6			1.06446	1.0976		0.802103
F	23.5	15.2			1.18184	1.37107		0.669171
F	12.6	11.5			1.0607	1.10037		0.82847
F	22	15			1.17609	1.34242		0.651852
F	14.2	12			1.07918	1.15229		0.821759
F	15.5	13.1			1.11727	1.19033		0.689474
F	20.5	14.1			1.14922	1.31175		0.731302
F	10.4	11.5			1.0607	1.01703		0.683817
F	8.4	10.9			1.03743	0.924279		0.648634
F	9.6	11.2			1.04922	0.982271		0.683309
F	10.5	11.7			1.06819	1.02119		0.655589
F	7	10.2			1.0086	0.845098		0.659626
F	12.7	13			1.11394	1.1038		0.578061
F	17	13.9			1.14301	1.23045		0.633001
F	8.4	10.9			1.03743	0.924279		0.648634
F	9.44	11.2			1.04922	0.974972		0.671921
F	12.13	11.7			1.06819	1.08386		0.757361
F	12.42	12.2			1.08636	1.09412		0.683978
F	5.68	9.2			0.963788	0.754348		0.729432
F	8.4	10.9			1.03743	0.924279		0.648634
F	11.38	12			1.07918	1.05614		0.658565
F	13.2	12.9			1.11059	1.12057		0.6149
F	12.1	12.7			1.1038	1.08279		0.59071
F	6.45	10.6			1.02531	0.80956		0.541554
F	9.4	12			1.07918	0.973128		0.543981
F	9.9	11.2			1.04922	0.995635		0.704662
F	10.5	11.7			1.06819	1.02119		0.655589
F	7	10.2			1.0086	0.845098		0.659626
F	6.3	10			1	0.799341		0.63
F	7.9	10.6			1.02531	0.897627		0.663299
F	3.75	8.1			0.908485	0.574031		0.705629
F	8.4	10.9			1.03743	0.924279		0.648634
F	9.6	11.2			1.04922	0.982271		0.683309
F	10.5	11.7			1.06819	1.02119		0.655589
F	7	10.2			1.0086	0.845098		0.659626
F	8.15	10.7			1.02938	0.911158		0.665283
F	17	13.9			1.14301	1.23045		0.633001
F	8.4	10.9			1.03743	0.924279		0.648634
F	9.6	11.2			1.04922	0.982271		0.683309
F	10.5	11.7			1.06819	1.02119		0.655589
F	7	10.2			1.0086	0.845098		0.659626
F	8.15	10.7			1.02938	0.911158		0.665283
F	15.4	13.6			1.13354	1.18752		0.612215
F	18.83	14.5			1.16137	1.27485		0.617656
F	12.83	13.3			1.12385	1.10823		0.545345
F	11.42	12			1.07918	1.05767		0.66088
F	9.6	11.2			1.04922	0.982271		0.683309
F	10.5	11.7			1.06819	1.02119		0.655589
F	12.7	13			1.11394	1.1038		0.578061
F	4.78	9.6			0.982271	0.679428		0.540274
F	10.15	11.8			1.07188	1.00647		0.61776
F	5.26	9.3			0.968483	0.720986		0.653938
F	7.1	10.5			1.02119	0.851258		0.613325
F	7.31	10.4			1.01703	0.863917		0.649856
F	8	10.7			1.02938	0.90309		0.653038
F	6.5	9.9			0.995635	0.812913		0.669897
F	6.35	9.7			0.986772	0.802774		0.695759
F	12.9	13.1			1.11727	1.11059		0.57382
F	4.75	9.4			0.973128	0.676694		0.571887
F	6.3	10			1	0.799341		0.63
F	7.9	10.6			1.02531	0.897627		0.663299
F	3.75	8.1			0.908485	0.574031		0.705629
F	8.4	10.9			1.03743	0.924279		0.648634
F	11.5	12			1.07918	1.0607		0.665509
F	9.6	11.2			1.04922	0.982271		0.683309
F	10.5	11.7			1.06819	1.02119		0.655589
F	7	10.2			1.0086	0.845098		0.659626
F	8.15	10.7			1.02938	0.911158		0.665283
F	6.57	10			1	0.817565		0.657
F	6.31	10			1	0.800029		0.631
F	4.42	8.5			0.929419	0.645422		0.719723
F	5.45	9			0.954243	0.736397		0.747599
F	3.96	8			0.90309	0.597695		0.773438
F	12.52	11.6			1.06446	1.0976		0.802103
F	14	12.6			1.10037	1.14613		0.699868
F	15.5	13.1			1.11727	1.19033		0.689474
F	20	14			1.14613	1.30103		0.728863
F	10.6	11.6			1.06446	1.02531		0.679097
F	15.8	12.7			1.1038	1.19866		0.77134
F	19.6	13.6			1.13354	1.29226		0.779183
F	18.6	13.9			1.14301	1.26951		0.692578
F	13	13.2			1.12057	1.11394		0.565225
F	4.56	9.6			0.982271	0.658965		0.515408
F	10.3	11.9			1.07555	1.01284		0.611218
F	5.1	9.3			0.968483	0.70757		0.634047
F	7.1	10.5			1.02119	0.851258		0.613325
F	7.31	10.4			1.01703	0.863917		0.649856
F	8	10.7			1.02938	0.90309		0.653038
F	14	12.6			1.10037	1.14613		0.699868
F	15.5	13.1			1.11727	1.19033		0.689474
F	20	14			1.14613	1.30103		0.728863
F	10.6	11.6			1.06446	1.02531		0.679097
F	16.2	12.7			1.1038	1.20952		0.790868
F	13.2	12.2			1.08636	1.12057		0.726933
F	10.6	11.4			1.0569	1.02531		0.71547
F	5.92	8.9			0.94939	0.772322		0.839753
F	13.25	12.2			1.08636	1.12222		0.729687
F	13.35	12.4			1.09342	1.12548		0.70019
F	16.5	13.5			1.13033	1.21748		0.670629
F	10.8	11.5			1.0607	1.03342		0.710118
F	11.8	11.9			1.07555	1.07188		0.700231
F	10.6	11.4			1.0569	1.02531		0.71547
F	5.92	8.9			0.94939	0.772322		0.839753
F	6.57	10			1	0.817565		0.657
F	6.31	10			1	0.800029		0.631
F	4.42	8.5			0.929419	0.645422		0.719723
F	5.45	9			0.954243	0.736397		0.747599
F	3.96	8			0.90309	0.597695		0.773438
F	12.52	11.6			1.06446	1.0976		0.802103
F	8.82	10.5			1.02119	0.945469		0.761905
F	14	12.6			1.10037	1.14613		0.699868
F	15.5	13.1			1.11727	1.19033		0.689474
F	20	14			1.14613	1.30103		0.728863
F	10.6	11.6			1.06446	1.02531		0.679097
F	15.8	12.7			1.1038	1.19866		0.77134
F	19.6	13.6			1.13354	1.29226		0.779183
F	18.6	13.9			1.14301	1.26951		0.692578
F	14.5	12.7			1.1038	1.16137		0.707875
F	9.54	11.2			1.04922	0.979548		0.679038
F	10.64	11.6			1.06446	1.02694		0.68166
F	9.2	10.8			1.03342	0.963788		0.730326
F	6.5	10			1	0.812913		0.65
F	6.31	10			1	0.800029		0.631
F	4.42	8.5			0.929419	0.645422		0.719723
F	5.5	9			0.954243	0.740363		0.754458
F	4	8			0.90309	0.60206		0.78125
F	12.5	11.6			1.06446	1.09691		0.800822
F	13.2	12.2			1.08636	1.12057		0.726933
F	19.6	13.6			1.13354	1.29226		0.779183
F	16.5	13.5			1.13033	1.21748		0.670629
F	4.1	8			0.90309	0.612784		0.800781
F	12.5	11.5			1.0607	1.09691		0.821895
F	11.4	12.1			1.08279	1.0569		0.6435
F	9.9	11.2			1.04922	0.995635		0.704662
F	5.9	8.9			0.94939	0.770852		0.836916
F	6.5	10			1	0.812913		0.65
F	14	12.6			1.10037	1.14613		0.699868
F	15.5	13.1			1.11727	1.19033		0.689474
F	20	14			1.14613	1.30103		0.728863
F	10.6	11.6			1.06446	1.02531		0.679097
F	16.2	12.7			1.1038	1.20952		0.790868
F	13.2	12.2			1.08636	1.12057		0.726933
F	10.6	11.4			1.0569	1.02531		0.71547
F	14	12.6			1.10037	1.14613		0.699868
F	15.5	13.1			1.11727	1.19033		0.689474
F	20	14			1.14613	1.30103		0.728863
F	10.6	11.6			1.06446	1.02531		0.679097
F	16.2	12.7			1.1038	1.20952		0.790868
F	13.2	12.2			1.08636	1.12057		0.726933
F	10.6	11.4			1.0569	1.02531		0.71547
F	5.92	8.9			0.94939	0.772322		0.839753
F	6.57	10			1	0.817565		0.657
F	6.31	10			1	0.800029		0.631
F	4.42	8.5			0.929419	0.645422		0.719723
F	5.45	9			0.954243	0.736397		0.747599
F	3.96	8			0.90309	0.597695		0.773438
F	12.52	11.6			1.06446	1.0976		0.802103
F	23.5	15.2			1.18184	1.37107		0.669171
F	12.6	11.5			1.0607	1.10037		0.82847
F	22	15			1.17609	1.34242		0.651852
F	14.2	12			1.07918	1.15229		0.821759
F	15.5	13.1			1.11727	1.19033		0.689474
F	20.5	14.1			1.14922	1.31175		0.731302
F	10.4	11.5			1.0607	1.01703		0.683817
F	13	13.2			1.12057	1.11394		0.565225
F	4.56	9.6			0.982271	0.658965		0.515408
F	10.3	11.9			1.07555	1.01284		0.611218
F	5.1	9.3			0.968483	0.70757		0.634047
F	7.1	10.5			1.02119	0.851258		0.613325
F	7.31	10.4			1.01703	0.863917		0.649856
F	8	10.7			1.02938	0.90309		0.653038
F	6.5	9.9			0.995635	0.812913		0.669897
F	6.35	9.7			0.986772	0.802774		0.695759
F	12.72	13			1.11394	1.10449		0.578971
F	4.75	9.4			0.973128	0.676694		0.571887
F	6.3	10			1	0.799341		0.63
F	7.9	10.6			1.02531	0.897627		0.663299
F	3.75	8.1			0.908485	0.574031		0.705629
F	8.4	10.9			1.03743	0.924279		0.648634
F	11.42	12			1.07918	1.05767		0.66088
F	9.6	11.2			1.04922	0.982271		0.683309
F	10.5	11.7			1.06819	1.02119		0.655589
F	7	10.2			1.0086	0.845098		0.659626
F	8.15	10.7			1.02938	0.911158		0.665283
F	13.25	12.2			1.08636	1.12222		0.729687
F	13.35	12.4			1.09342	1.12548		0.70019
F	16.5	13.5			1.13033	1.21748		0.670629
F	10.8	11.5			1.0607	1.03342		0.710118
F	11.8	11.9			1.07555	1.07188		0.700231
F	10.6	11.4			1.0569	1.02531		0.71547
F	5.92	8.9			0.94939	0.772322		0.839753
F	6.57	10			1	0.817565		0.657
F	6.31	10			1	0.800029		0.631
F	4.42	8.5			0.929419	0.645422		0.719723
F	5.45	9			0.954243	0.736397		0.747599
F	3.96	8			0.90309	0.597695		0.773438
F	12.52	11.6			1.06446	1.0976		0.802103
F	8.82	10.5			1.02119	0.945469		0.761905
F	14	12.6			1.10037	1.14613		0.699868
F	15.5	13.1			1.11727	1.19033		0.689474
F	20	14			1.14613	1.30103		0.728863
F	10.6	11.6			1.06446	1.02531		0.679097
F	15.8	12.7			1.1038	1.19866		0.77134
F	19.6	13.6			1.13354	1.29226		0.779183
F	18.6	13.9			1.14301	1.26951		0.692578
F	14.5	12.7			1.1038	1.16137		0.707875
F	9.54	11.2			1.04922	0.979548		0.679038
F	10.64	11.6			1.06446	1.02694		0.68166
F	9.2	10.8			1.03342	0.963788		0.730326
F	11	11.5			1.0607	1.04139		0.723268
F	11.85	12.6			1.10037	1.07372		0.592389
F	66.5	20			1.30103	1.82282		0.83125
F	14.5	12.7			1.1038	1.16137		0.707875
F	4	8			0.90309	0.60206		0.78125
F	12.5	11.5			1.0607	1.09691		0.821895
F	23.5	15.2			1.18184	1.37107		0.669171
F	14	12.6			1.10037	1.14613		0.699868
F	15.5	13.1			1.11727	1.19033		0.689474
F	20	14			1.14613	1.30103		0.728863
F	10.6	11.6			1.06446	1.02531		0.679097
F	16.2	12.7			1.1038	1.20952		0.790868
F	13.2	12.2			1.08636	1.12057		0.726933
F	19.6	13.6			1.13354	1.29226		0.779183
F	16.5	13.5			1.13033	1.21748		0.670629
F	10.8	11.5			1.0607	1.03342		0.710118
F	18.6	13.9			1.14301	1.26951		0.692578
F	9.2	10.8			1.03342	0.963788		0.730326
F	8.82	10.5			1.02119	0.945469		0.761905
F	6.5	10			1	0.812913		0.65
F	11.38	12			1.07918	1.05614		0.658565
F	9.87	11.2			1.04922	0.994317		0.702527
F	10.5	11.7			1.06819	1.02119		0.655589
F	12.8	13.1			1.11727	1.10721		0.569372
F	17	13.9			1.14301	1.23045		0.633001
F	8.4	10.9			1.03743	0.924279		0.648634
F	7	10.2			1.0086	0.845098		0.659626
F	6.3	10			1	0.799341		0.63
F	7.9	10.6			1.02531	0.897627		0.663299
F	12.08	12.5			1.09691	1.08207		0.618496
F	10.18	12			1.07918	1.00775		0.58912
F	5.68	9.7			0.986772	0.754348		0.622348
F	13.17	12.9			1.11059	1.11959		0.613503
F	12.12	12.7			1.1038	1.0835		0.591686
F	6.41	10.6			1.02531	0.806858		0.538196
F	12.67	13			1.11394	1.10278		0.576695
F	17	13.9			1.14301	1.23045		0.633001
F	10.1	12.2			1.08636	1.00432		0.556214
F	11.38	12			1.07918	1.05614		0.658565
F	9.87	11.2			1.04922	0.994317		0.702527
F	10.5	11.7			1.06819	1.02119		0.655589
F	15.23	13.5			1.13033	1.1827		0.619011
F	18.83	14.5			1.16137	1.27485		0.617656
F	12.83	13.3			1.12385	1.10823		0.545345
F	11.42	12			1.07918	1.05767		0.66088
F	9.6	11.2			1.04922	0.982271		0.683309
F	10.5	11.7			1.06819	1.02119		0.655589
F	7	10.2			1.0086	0.845098		0.659626
F	8.15	10.7			1.02938	0.911158		0.665283
F	8.3	10.7			1.02938	0.919078		0.677527
F	12.7	13			1.11394	1.1038		0.578061
F	4.78	9.6			0.982271	0.679428		0.540274
F	10.15	11.8			1.07188	1.00647		0.61776
F	5.26	9.3			0.968483	0.720986		0.653938
F	6.84	10.5			1.02119	0.835056		0.590865
F	3.75	8.1			0.908485	0.574031		0.705629
F	8.4	10.9			1.03743	0.924279		0.648634
F	14.2	12.5			1.09691	1.15229		0.72704
F	13	13.2			1.12057	1.11394		0.565225
F	4.56	9.6			0.982271	0.658965		0.515408
F	10.3	11.9			1.07555	1.01284		0.611218
F	5.1	9.3			0.968483	0.70757		0.634047
F	8.4	10.9			1.03743	0.924279		0.648634
F	11.38	12			1.07918	1.05614		0.658565
F	9.87	11.2			1.04922	0.994317		0.702527
F	10.5	11.7			1.06819	1.02119		0.655589
F	7	10.2			1.0086	0.845098		0.659626
F	8.15	10.7			1.02938	0.911158		0.665283
F	12.08	12.5			1.09691	1.08207		0.618496
F	10.18	12			1.07918	1.00775		0.58912
F	5.68	9.7			0.986772	0.754348		0.622348
F	13.2	12.9			1.11059	1.12057		0.6149
F	6.84	10.5			1.02119	0.835056		0.590865
F	7.28	10.4			1.01703	0.862131		0.647189
F	7.98	10.7			1.02938	0.902003		0.651406
F	6.51	9.9			0.995635	0.813581		0.670927
F	6.47	9.7			0.986772	0.810904		0.708907
F	12.69	13			1.11394	1.10346		0.577606
F	4.77	9.4			0.973128	0.678518		0.574295
F	6.24	10			1	0.795185		0.624
F	7.98	10.6			1.02531	0.902003		0.670016
F	3.84	8.1			0.908485	0.584331		0.722564
F	12.7	13			1.11394	1.1038		0.578061
F	4.78	9.6			0.982271	0.679428		0.540274
F	10.15	11.8			1.07188	1.00647		0.61776
F	5.26	9.3			0.968483	0.720986		0.653938
F	6.84	10.5			1.02119	0.835056		0.590865
F	6.41	10.6			1.02531	0.806858		0.538196
F	12.67	13			1.11394	1.10278		0.576695
F	17	13.9			1.14301	1.23045		0.633001
F	10.8	11.5			1.0607	1.03342		0.710118
F	14.1	12.4			1.09342	1.14922		0.739527
F	9.88	10.7			1.02938	0.994757		0.806502
F	8.33	10.4			1.01703	0.920645		0.740534
F	14.42	12.4			1.09342	1.15897		0.756311
F	10.71	11.4			1.0569	1.02979		0.722894
F	9.18	10.5			1.02119	0.962843		0.793003
F	9.44	11.2			1.04922	0.974972		0.671921
F	12.13	11.7			1.06819	1.08386		0.757361
F	12.42	12.2			1.08636	1.09412		0.683978
F	5.68	9.2			0.963788	0.754348		0.729432
F	3.43	8			0.90309	0.535294		0.669922
F	7.04	9.9			0.995635	0.847573		0.72555
F	7.16	10.3			1.01284	0.854913		0.655241
F	13	13.2			1.12057	1.11394		0.565225
F	4.56	9.6			0.982271	0.658965		0.515408
F	10.3	11.9			1.07555	1.01284		0.611218
F	5.1	9.3			0.968483	0.70757		0.634047
F	7.1	10.5			1.02119	0.851258		0.613325
F	7.31	10.4			1.01703	0.863917		0.649856
F	8	10.7			1.02938	0.90309		0.653038
F	6.5	9.9			0.995635	0.812913		0.669897
F	6.35	9.7			0.986772	0.802774		0.695759
F	12.72	13			1.11394	1.10449		0.578971
F	4.75	9.4			0.973128	0.676694		0.571887
F	5.26	9.3			0.968483	0.720986		0.653938
F	6.84	10.5			1.02119	0.835056		0.590865
F	7.28	10.4			1.01703	0.862131		0.647189
F	7.98	10.7			1.02938	0.902003		0.651406
F	6.51	9.9			0.995635	0.813581		0.670927
F	9.6	11.2			1.04922	0.982271		0.683309
F	10.5	11.7			1.06819	1.02119		0.655589
F	7	10.2			1.0086	0.845098		0.659626
F	8.15	10.7			1.02938	0.911158		0.665283
F	12.47	11.6			1.06446	1.09587		0.7989
F	23.1	15.1			1.17898	1.36361		0.670936
F	14.14	12.7			1.1038	1.15045		0.690301
F	15.24	13			1.11394	1.18298		0.693673
F	20	14			1.14613	1.30103		0.728863
F	10.43	11.5			1.0607	1.01828		0.685789
F	15.56	12.7			1.1038	1.19201		0.759624
F	19.52	13.8			1.13988	1.29048		0.74275
F	18.6	13.9			1.14301	1.26951		0.692578
F	14.5	12.7			1.1038	1.16137		0.707875
F	9.54	11.2			1.04922	0.979548		0.679038
F	10.64	11.6			1.06446	1.02694		0.68166
F	13.26	12.2			1.08636	1.12254		0.730237
F	13.35	12.4			1.09342	1.12548		0.70019
F	16.61	13.5			1.13033	1.22037		0.6751
F	10.8	11.5			1.0607	1.03342		0.710118
F	11.8	11.9			1.07555	1.07188		0.700231
F	10.6	11.4			1.0569	1.02531		0.71547
F	9.05	10.8			1.03342	0.956649		0.718418
F	8.75	10.8			1.03342	0.942008		0.694603
F	5.92	8.9			0.94939	0.772322		0.839753
F	6.57	10			1	0.817565		0.657
F	6.31	10			1	0.800029		0.631
F	4.42	8.5			0.929419	0.645422		0.719723
F	5.45	9			0.954243	0.736397		0.747599
F	3.96	8			0.90309	0.597695		0.773438
F	10.5	11.7			1.06819	1.02119		0.655589
F	6.2	9			0.954243	0.792392		0.85048
F	4.4	8.4			0.924279	0.643453		0.74236
F	5.5	9			0.954243	0.740363		0.754458
F	4	8			0.90309	0.60206		0.78125
F	12.5	11.6			1.06446	1.09691		0.800822
F	13.2	12.2			1.08636	1.12057		0.726933
F	19.5	13.6			1.13354	1.29003		0.775207
F	13.2	12.2			1.08636	1.12057		0.726933
F	14	12.6			1.10037	1.14613		0.699868
F	15.5	13.1			1.11727	1.19033		0.689474
F	20	14			1.14613	1.30103		0.728863
F	10.6	11.6			1.06446	1.02531		0.679097
F	16.2	12.7			1.1038	1.20952		0.790868
F	19.6	13.6			1.13354	1.29226		0.779183
F	16.2	13			1.11394	1.20952		0.737369
F	10.8	11.5			1.0607	1.03342		0.710118
F	18.6	13.9			1.14301	1.26951		0.692578
F	9.2	10.8			1.03342	0.963788		0.730326
F	16.2	12.5			1.09691	1.20952		0.82944
F	13.2	12.2			1.08636	1.12057		0.726933
F	18.4	13.7			1.13672	1.26482		0.715577
F	9.2	10.8			1.03342	0.963788		0.730326
F	6.65	10			1	0.822822		0.665
F	6.3	10			1	0.799341		0.63
F	14.2	12			1.07918	1.15229		0.821759
F	15.5	13.1			1.11727	1.19033		0.689474
F	9.6	11.2			1.04922	0.982271		0.683309
F	66.5	20			1.30103	1.82282		0.83125
F	14.5	12.7			1.1038	1.16137		0.707875
F	4	8			0.90309	0.60206		0.78125
F	12.5	11.5			1.0607	1.09691		0.821895
F	23.5	15.2			1.18184	1.37107		0.669171
F	14	12.6			1.10037	1.14613		0.699868
F	15.5	13.1			1.11727	1.19033		0.689474
F	20	14			1.14613	1.30103		0.728863
F	10.6	11.6			1.06446	1.02531		0.679097
F	16.2	12.7			1.1038	1.20952		0.790868
F	13.2	12.2			1.08636	1.12057		0.726933
F	19.6	13.6			1.13354	1.29226		0.779183
F	16.5	13.5			1.13033	1.21748		0.670629
F	10.8	11.5			1.0607	1.03342		0.710118
F	18.6	13.9			1.14301	1.26951		0.692578
F	9.2	10.8			1.03342	0.963788		0.730326
F	8.82	10.5			1.02119	0.945469		0.761905
F	6.5	10			1	0.812913		0.65
F	9.5	11			1.04139	0.977724		0.713749
F	32.92	17.6			1.24551	1.51746		0.60384
F	25.38	16			1.20412	1.40449		0.619629
F	16.29	14			1.14613	1.21192		0.593659
F	15.58	13.7			1.13672	1.19257		0.605907
F	18.99	14.5			1.16137	1.27852		0.622904
F	20	14.5			1.16137	1.30103		0.656033
F	15.31	13.4			1.1271	1.18498		0.636298
F	18.39	14.5			1.16137	1.26458		0.603223
F	14.3	13.3			1.12385	1.15534		0.607829
F	13.98	12.4			1.09342	1.14551		0.733233
F	14.8	13.1			1.11727	1.17026		0.658336
F	9.33	12			1.07918	0.969882		0.539931
F	11	11.5			1.0607	1.04139		0.723268
F	11.83	12.6			1.10037	1.07298		0.591389
F	10.64	11.9			1.07555	1.02694		0.631394
F	12.27	13			1.11394	1.08884		0.558489
F	8.27	10.6			1.02531	0.917506		0.694365
F	4.57	9.5			0.977724	0.659916		0.533022
F	11.42	12			1.07918	1.05767		0.66088
F	9.6	11.2			1.04922	0.982271		0.683309
F	10.5	11.7			1.06819	1.02119		0.655589
F	7	10.2			1.0086	0.845098		0.659626
F	8.15	10.7			1.02938	0.911158		0.665283
F	9.18	10.5			1.02119	0.962843		0.793003
F	9.44	11.2			1.04922	0.974972		0.671921
F	12.13	11.7			1.06819	1.08386		0.757361
F	12.42	12.2			1.08636	1.09412		0.683978
F	5.68	9.2			0.963788	0.754348		0.729432
F	8.4	10.9			1.03743	0.924279		0.648634
F	13.25	12.2			1.08636	1.12222		0.729687
F	13.35	12.4			1.09342	1.12548		0.70019
F	16.5	13.5			1.13033	1.21748		0.670629
F	10.8	11.5			1.0607	1.03342		0.710118
F	11.8	11.9			1.07555	1.07188		0.700231
F	10.6	11.4			1.0569	1.02531		0.71547
F	12.08	12.5			1.09691	1.08207		0.618496
F	10.18	12			1.07918	1.00775		0.58912
F	5.68	9.7			0.986772	0.754348		0.622348
F	13.17	12.9			1.11059	1.11959		0.613503
F	12.12	12.7			1.1038	1.0835		0.591686
F	6.41	10.6			1.02531	0.806858		0.538196
F	12.67	13			1.11394	1.10278		0.576695
F	17	13.9			1.14301	1.23045		0.633001
F	10.1	12.2			1.08636	1.00432		0.556214
F	15.23	13.5			1.13033	1.1827		0.619011
F	18.83	14.5			1.16137	1.27485		0.617656
F	12.83	13.3			1.12385	1.10823		0.545345
F	11.42	12			1.07918	1.05767		0.66088
F	9.6	11.2			1.04922	0.982271		0.683309
F	10.5	11.7			1.06819	1.02119		0.655589
F	7	10.2			1.0086	0.845098		0.659626
F	8.15	10.7			1.02938	0.911158		0.665283
F	8.3	10.7			1.02938	0.919078		0.677527
F	12.7	13			1.11394	1.1038		0.578061
F	4.78	9.6			0.982271	0.679428		0.540274
F	10.15	11.8			1.07188	1.00647		0.61776
F	5.26	9.3			0.968483	0.720986		0.653938
F	6.84	10.5			1.02119	0.835056		0.590865
F	8.4	10.9			1.03743	0.924279		0.648634
F	11.38	12			1.07918	1.05614		0.658565
F	9.87	11.2			1.04922	0.994317		0.702527
F	10.5	11.7			1.06819	1.02119		0.655589
F	7	10.2			1.0086	0.845098		0.659626
F	8.15	10.7			1.02938	0.911158		0.665283
F	12.7	13			1.11394	1.1038		0.578061
F	4.78	9.6			0.982271	0.679428		0.540274
F	10.15	11.8			1.07188	1.00647		0.61776
F	5.26	9.3			0.968483	0.720986		0.653938
F	6.84	10.5			1.02119	0.835056		0.590865
F	7.28	10.4			1.01703	0.862131		0.647189
F	7.98	10.7			1.02938	0.902003		0.651406
F	6.51	9.9			0.995635	0.813581		0.670927
F	6.47	9.7			0.986772	0.810904		0.708907
F	12.69	13			1.11394	1.10346		0.577606
F	4.77	9.4			0.973128	0.678518		0.574295
F	6.24	10			1	0.795185		0.624
F	7.98	10.6			1.02531	0.902003		0.670016
F	3.84	8.1			0.908485	0.584331		0.722564
F	12.47	11.6			1.06446	1.09587		0.7989
F	23.1	15.1			1.17898	1.36361		0.670936
F	14.14	12.7			1.1038	1.15045		0.690301
F	15.24	13			1.11394	1.18298		0.693673
F	20	14			1.14613	1.30103		0.728863
F	10.43	11.5			1.0607	1.01828		0.685789
F	15.56	12.7			1.1038	1.19201		0.759624
F	19.52	13.8			1.13988	1.29048		0.74275
F	18.6	13.9			1.14301	1.26951		0.692578
F	14.5	12.7			1.1038	1.16137		0.707875
F	9.54	11.2			1.04922	0.979548		0.679038
F	10.64	11.6			1.06446	1.02694		0.68166
F	13.26	12.2			1.08636	1.12254		0.730237
F	13.35	12.4			1.09342	1.12548		0.70019
F	16.61	13.5			1.13033	1.22037		0.6751
F	10.8	11.5			1.0607	1.03342		0.710118
F	11.8	11.9			1.07555	1.07188		0.700231
F	10.6	11.4			1.0569	1.02531		0.71547
F	9.05	10.8			1.03342	0.956649		0.718418
F	8.75	10.8			1.03342	0.942008		0.694603
F	5.92	8.9			0.94939	0.772322		0.839753
F	6.57	10			1	0.817565		0.657
F	6.31	10			1	0.800029		0.631
F	4.42	8.5			0.929419	0.645422		0.719723
F	5.45	9			0.954243	0.736397		0.747599
F	3.96	8			0.90309	0.597695		0.773438
								0.686901
								0.85048
								0.515408

## Sheet: male
Sex	Wt.(gm)	TL (cm)			LOG TL	LOG W		K
M	8.6	11			1.04139	0.934498		0.646131
M	10.4	11.3			1.05308	1.01703		0.720772
M	6.2	9			0.954243	0.792392		0.85048
M	5.5	8.6			0.934498	0.740363		0.864704
M	8.5	10.4			1.01703	0.929419		0.755647
M	11.2	11			1.04139	1.04922		0.841473
M	16.5	13.6			1.13354	1.21748		0.655945
M	8.4	10.9			1.03743	0.924279		0.648634
M	10	11			1.04139	1		0.751315
M	6	8.9			0.94939	0.778151		0.851101
M	5.4	8.5			0.929419	0.732394		0.8793
M	8.5	10.4			1.01703	0.929419		0.755647
M	12	11.6			1.06446	1.07918		0.768789
M	3.6	7.4			0.869232	0.556303		0.888398
M	4.9	8.2			0.913814	0.690196		0.888699
M	6.4	9.8			0.991226	0.80618		0.679989						a	0.0105196			-1.978
M	4.7	8.2			0.913814	0.672098		0.852425						b	2.817
M	8.5	10.4			1.01703	0.929419		0.755647						a range	0.00898462	0.0118803
M	9.7	11.2			1.04922	0.986772		0.690427
M	14.6	12.7			1.1038	1.16435		0.712757						SUMMARY OUTPUT
M	34	16.2			1.20952	1.53148		0.799712
M	60	17.5			1.24304	1.77815		1.11953						Regression Statistics
M	9.1	10.2			1.0086	0.959041		0.857513						Multiple R	0.957971
M	6.2	9			0.954243	0.792392		0.85048						R Square	0.917708
M	10.8	11.5			1.0607	1.03342		0.710118						Adjusted R Square	0.917607
M	10	11.1			1.04532	1		0.731191						Standard Error	0.0570813
M	12.7	12.3			1.08991	1.1038		0.682478						Observations	815
M	11.5	11.7			1.06819	1.0607		0.718026
M	8.5	9.9			0.995635	0.929419		0.876019						ANOVA
M	6.5	9			0.954243	0.812913		0.891632							df	SS	MS	F	Significance F
M	12.7	12.3			1.08991	1.1038		0.682478						Regression	1	29.541	29.541	9066.47	0
M	11.5	11.7			1.06819	1.0607		0.718026						Residual	813	2.64897	0.00325827
M	9.4	10.9			1.03743	0.973128		0.725852						Total	814	32.19
M	9	10.2			1.0086	0.954243		0.84809
M	10.4	11.4			1.0569	1.01703		0.70197							Coefficients	Standard Error	t Stat	P-value	Lower 95%	Upper 95%	Lower 95.0%	Upper 95.0%
M	11	11.4			1.0569	1.04139		0.742469						Intercept	-1.98584	0.0309055	-64.2551	0	-2.0465	-1.92517	-2.0465	-1.92517
M	12.4	11.8			1.07188	1.09342		0.754702						X Variable 1	2.82762	0.0296962	95.218	0	2.76933	2.88591	2.76933	2.88591
M	6.6	9.1			0.959041	0.819544		0.87583
M	8.6	10.6			1.02531	0.934498		0.722073
M	5.5	8.6			0.934498	0.740363		0.864704
M	8.5	10.4			1.01703	0.929419		0.755647
M	9.7	11.2			1.04922	0.986772		0.690427
M	15.2	13			1.11394	1.18184		0.691853
M	34	16.2			1.20952	1.53148		0.799712
M	60	17.5			1.24304	1.77815		1.11953
M	9.4	11.4			1.0569	0.973128		0.634473
M	6.7	9.6			0.982271	0.826075		0.757288
M	10.8	11.5			1.0607	1.03342		0.710118
M	5.2	9.5			0.977724	0.716003		0.606502
M	12.7	12.3			1.08991	1.1038		0.682478
M	11.5	11.7			1.06819	1.0607		0.718026
M	8.5	9.9			0.995635	0.929419		0.876019
M	6.5	9			0.954243	0.812913		0.891632
M	12.7	12.3			1.08991	1.1038		0.682478
M	11.5	11.7			1.06819	1.0607		0.718026
M	9.4	10.9			1.03743	0.973128		0.725852
M	9.4	10.8			1.03342	0.973128		0.746202
M	10.4	11.4			1.0569	1.01703		0.70197
M	11	11.4			1.0569	1.04139		0.742469
M	6.5	10			1	0.812913		0.65
M	6.8	10.6			1.02531	0.832509		0.570941
M	8.81	10.9			1.03743	0.944976		0.680294
M	12.3	11.6			1.06446	1.08991		0.788009
M	8.7	11.1			1.04532	0.939519		0.636137
M	5.1	8.8			0.944483	0.70757		0.74838
M	6.5	10			1	0.812913		0.65
M	5.5	8.6			0.934498	0.740363		0.864704
M	8.5	10.4			1.01703	0.929419		0.755647
M	12	11.6			1.06446	1.07918		0.768789
M	16.5	13.6			1.13354	1.21748		0.655945
M	8.6	11.1			1.04532	0.934498		0.628825
M	10.8	11.5			1.0607	1.03342		0.710118
M	6.5	9			0.954243	0.812913		0.891632
M	5.7	9.6			0.982271	0.755875		0.64426
M	8.5	10.4			1.01703	0.929419		0.755647
M	12	11.6			1.06446	1.07918		0.768789
M	3.9	8.6			0.934498	0.591065		0.613154
M	5.2	8.8			0.944483	0.716003		0.763054
M	6.6	10			1	0.819544		0.66
M	12.3	11.6			1.06446	1.08991		0.788009
M	8.72	11.1			1.04532	0.940516		0.637599
M	10.85	11.5			1.0607	1.03543		0.713405
M	6.53	10			1	0.814913		0.653
M	5.5	8.6			0.934498	0.740363		0.864704
M	8.5	10.4			1.01703	0.929419		0.755647
M	12	11.6			1.06446	1.07918		0.768789
M	16.5	13.6			1.13354	1.21748		0.655945
M	8.62	11.1			1.04532	0.935507		0.630287
M	10.27	11.2			1.04922	1.01157		0.730998
M	6.5	9			0.954243	0.812913		0.891632
M	5.73	9.6			0.982271	0.758155		0.647651
M	8.5	10.4			1.01703	0.929419		0.755647
M	12	11.6			1.06446	1.07918		0.768789
M	3.95	8.6			0.934498	0.596597		0.621015
M	5.12	8.8			0.944483	0.70927		0.751315
M	6.61	10			1	0.820201		0.661
M	5.15	9.5			0.977724	0.711807		0.600671
M	6.53	10			1	0.814913		0.653
M	5.15	8.8			0.944483	0.711807		0.755717
M	15.61	13.7			1.13672	1.1934		0.607073
M	10.8	11.5			1.0607	1.03342		0.710118
M	6.56	9.8			0.991226	0.816904		0.696988
M	8.62	11.1			1.04532	0.935507		0.630287
M	8.72	11.1			1.04532	0.940516		0.637599
M	10.85	11.5			1.0607	1.03543		0.713405
M	9.7	11.2			1.04922	0.986772		0.690427
M	15.2	13			1.11394	1.18184		0.691853
M	5.15	8.8			0.944483	0.711807		0.755717
M	15.61	13.7			1.13672	1.1934		0.607073
M	10.8	11.5			1.0607	1.03342		0.710118
M	10.32	11.4			1.0569	1.01368		0.696571
M	11	11.4			1.0569	1.04139		0.742469
M	4	7.7			0.886491	0.60206		0.876169
M	4.32	7.6			0.880814	0.635484		0.984108
M	9.6	11.5			1.0607	0.982271		0.631216
M	12.7	12.3			1.08991	1.1038		0.682478
M	11.5	11.7			1.06819	1.0607		0.718026
M	10.7	11.5			1.0607	1.02938		0.703542
M	8.75	11			1.04139	0.942008		0.6574
M	7.2	10.3			1.01284	0.857332		0.658902
M	15.45	13			1.11394	1.18893		0.703232
M	14.75	13.5			1.13033	1.16879		0.599502
M	5.77	9.7			0.986772	0.761176		0.632209
M	14.52	13.2			1.12057	1.16197		0.631313
M	8.84	11.3			1.05308	0.946452		0.612656
M	5.5	8.6			0.934498	0.740363		0.864704
M	8.5	10.4			1.01703	0.929419		0.755647
M	12	11.6			1.06446	1.07918		0.768789
M	14.5	12.2			1.08636	1.16137		0.798525
M	6.5	9.6			0.982271	0.812913		0.734682
M	10.6	11.5			1.0607	1.02531		0.696967
M	9	11			1.04139	0.954243		0.676183
M	12.92	12.1			1.08279	1.11126		0.7293
M	6.47	9.9			0.995635	0.810904		0.666805
M	6.56	9.8			0.991226	0.816904		0.696988
M	8.62	11.1			1.04532	0.935507		0.630287
M	8.72	11.1			1.04532	0.940516		0.637599
M	10.85	11.5			1.0607	1.03543		0.713405
M	3.95	7.6			0.880814	0.596597		0.899821
M	4.3	7.8			0.892095	0.633468		0.906118
M	9.06	11			1.04139	0.957128		0.680691
M	8.32	10.8			1.03342	0.920123		0.660468
M	6.75	10.6			1.02531	0.829304		0.566743
M	8.81	10.9			1.03743	0.944976		0.680294
M	8.08	10.3			1.01284	0.907411		0.739434
M	8.58	11.4			1.0569	0.933487		0.579126
M	5.3	9.2			0.963788	0.724276		0.680632
M	6.61	10			1	0.820201		0.661
M	5.15	9.5			0.977724	0.711807		0.600671
M	6.53	10			1	0.814913		0.653
M	5.73	9.6			0.982271	0.758155		0.647651
M	8.9	11			1.04139	0.94939		0.66867
M	8	10.2			1.0086	0.90309		0.753858
M	9.1	10.9			1.03743	0.959041		0.702687
M	9.4	11.4			1.0569	0.973128		0.634473
M	6.65	9.6			0.982271	0.822822		0.751637
M	10.35	11.3			1.05308	1.01494		0.717307
M	10.9	11.9			1.07555	1.03743		0.646823
M	8	11.1			1.04532	0.90309		0.584953
M	11.65	11.7			1.06819	1.06633		0.727392
M	8.1	10.6			1.02531	0.908485		0.680092
M	15.65	13.7			1.13672	1.19451		0.608629
M	9.7	11.2			1.04922	0.986772		0.690427
M	10.3	11.4			1.0569	1.01284		0.695221
M	11	11.4			1.0569	1.04139		0.742469
M	10.2	11.2			1.04922	1.0086		0.726016
M	7.62	10.4			1.01703	0.881955		0.677415
M	9.6	11.5			1.0607	0.982271		0.631216
M	10.85	11.5			1.0607	1.03543		0.713405
M	5.12	8.8			0.944483	0.70927		0.751315
M	7.2	10.3			1.01284	0.857332		0.658902
M	5.65	9.1			0.959041	0.752048		0.749763
M	7.2	10.2			1.0086	0.857332		0.678472
M	5.65	9			0.954243	0.752048		0.775034
M	7.7	10.5			1.02119	0.886491		0.665155
M	7.8	10.4			1.01703	0.892095		0.693417
M	5.5	9			0.954243	0.740363		0.754458
M	3.95	7.6			0.880814	0.596597		0.899821
M	4.3	7.8			0.892095	0.633468		0.906118
M	9.06	11			1.04139	0.957128		0.680691
M	8.32	10.8			1.03342	0.920123		0.660468
M	6.75	10.6			1.02531	0.829304		0.566743
M	8.81	10.9			1.03743	0.944976		0.680294
M	8.08	10.3			1.01284	0.907411		0.739434
M	9.4	10.9			1.03743	0.973128		0.725852
M	9.35	11.4			1.0569	0.970812		0.631098
M	6.65	9.6			0.982271	0.822822		0.751637
M	8.5	10.4			1.01703	0.929419		0.755647
M	12	11.6			1.06446	1.07918		0.768789
M	16.6	13.7			1.13672	1.22011		0.645575
M	8.6	10.6			1.02531	0.934498		0.722073
M	60	17.5			1.24304	1.77815		1.11953
M	9.4	11.4			1.0569	0.973128		0.634473
M	6.7	9.6			0.982271	0.826075		0.757288
M	10.8	11.5			1.0607	1.03342		0.710118
M	5.2	9.5			0.977724	0.716003		0.606502
M	12.7	12.3			1.08991	1.1038		0.682478
M	11.5	11.7			1.06819	1.0607		0.718026
M	8.5	9.9			0.995635	0.929419		0.876019
M	6.8	9.1			0.959041	0.832509		0.90237
M	12.7	12.3			1.08991	1.1038		0.682478
M	11.5	11.7			1.06819	1.0607		0.718026
M	9.6	11.1			1.04532	0.982271		0.701944
M	9.4	10.8			1.03342	0.973128		0.746202
M	10.4	11.4			1.0569	1.01703		0.70197
M	11	11.4			1.0569	1.04139		0.742469
M	6.6	10.1			1.00432	0.819544		0.640589
M	6.8	10.6			1.02531	0.832509		0.570941
M	6.5	10			1	0.812913		0.65
M	12.3	11.6			1.06446	1.08991		0.788009
M	8.4	10.8			1.03342	0.924279		0.666819
M	4.9	8.4			0.924279	0.690196		0.82672
M	9.7	11.2			1.04922	0.986772		0.690427
M	15.2	13			1.11394	1.18184		0.691853
M	5.15	8.8			0.944483	0.711807		0.755717
M	15.61	13.7			1.13672	1.1934		0.607073
M	10.8	11.5			1.0607	1.03342		0.710118
M	10.32	11.4			1.0569	1.01368		0.696571
M	11	11.4			1.0569	1.04139		0.742469
M	4	7.7			0.886491	0.60206		0.876169
M	4.32	7.6			0.880814	0.635484		0.984108
M	9.6	11.5			1.0607	0.982271		0.631216
M	12.7	12.3			1.08991	1.1038		0.682478
M	11.5	11.7			1.06819	1.0607		0.718026
M	10.7	11.5			1.0607	1.02938		0.703542
M	8.75	11			1.04139	0.942008		0.6574
M	7.2	10.3			1.01284	0.857332		0.658902
M	16.5	13.6			1.13354	1.21748		0.655945
M	8.62	11.1			1.04532	0.935507		0.630287
M	10.27	11.2			1.04922	1.01157		0.730998
M	5.3	9.2			0.963788	0.724276		0.680632
M	6.61	10			1	0.820201		0.661
M	5.15	9.5			0.977724	0.711807		0.600671
M	6.53	10			1	0.814913		0.653
M	5.73	9.6			0.982271	0.758155		0.647651
M	7.1	10.5			1.02119	0.851258		0.613325
M	4.52	9.2			0.963788	0.655138		0.580464
M	4.4	9.1			0.959041	0.643453		0.583887
M	11.65	12.2			1.08636	1.06633		0.641574
M	8.65	11.4			1.0569	0.937016		0.58385
M	2.43	7.3			0.863323	0.385606		0.624651
M	4.72	9			0.954243	0.673942		0.647462
M	3.95	8.6			0.934498	0.596597		0.621015
M	3.95	8.6			0.934498	0.596597		0.621015
M	16.45	13.6			1.13354	1.21617		0.653957
M	9.95	12			1.07918	0.997823		0.57581
M	5.45	9.6			0.982271	0.736397		0.616003
M	7.1	10.7			1.02938	0.851258		0.579571
M	4.85	9.6			0.982271	0.685742		0.548186
M	5.32	9.4			0.973128	0.725912		0.640513
M	11.88	12.3			1.08991	1.07482		0.638412
M	14.53	13.6			1.13354	1.16227		0.577629
M	13.74	13.1			1.11727	1.13799		0.611185
M	20.03	14.7			1.16732	1.30168		0.630564
M	11.59	12.4			1.09342	1.06408		0.607881
M	12.29	13.3			1.12385	1.08955		0.522393
M	13.95	13.6			1.13354	1.14457		0.554571
M	5.43	9.4			0.973128	0.7348		0.653757
M	4.85	9.6			0.982271	0.685742		0.548186
M	5.23	9.4			0.973128	0.718502		0.629677
M	9.15	11.2			1.04922	0.961421		0.651279
M	10.5	12			1.07918	1.02119		0.607639
M	11.6	12.3			1.08991	1.06446		0.623365
M	7.22	10.9			1.03743	0.858537		0.557516
M	7.1	10.5			1.02119	0.851258		0.613325
M	4.52	9.2			0.963788	0.655138		0.580464
M	4.4	9.1			0.959041	0.643453		0.583887
M	11.65	12.2			1.08636	1.06633		0.641574
M	8.65	11.4			1.0569	0.937016		0.58385
M	21.5	15.4			1.18752	1.33244		0.588676
M	4.72	9			0.954243	0.673942		0.647462
M	3.95	8.6			0.934498	0.596597		0.621015
M	16.45	13.6			1.13354	1.21617		0.653957
M	9.95	12			1.07918	0.997823		0.57581
M	5.45	9.6			0.982271	0.736397		0.616003
M	7.1	10.7			1.02938	0.851258		0.579571
M	4.85	9.6			0.982271	0.685742		0.548186
M	5.32	9.4			0.973128	0.725912		0.640513
M	2.4	7.3			0.863323	0.380211		0.61694
M	5.3	9.2			0.963788	0.724276		0.680632
M	5.15	9.5			0.977724	0.711807		0.600671
M	6.53	10			1	0.814913		0.653
M	5.76	9.5			0.977724	0.760422		0.671818
M	5.8	9.9			0.995635	0.763428		0.597754
M	4.5	9.3			0.968483	0.653213		0.559453
F	13	13.2			1.12057	1.11394		0.565225
F	4.56	9.6			0.982271	0.658965		0.515408
F	10.3	11.9			1.07555	1.01284		0.611218
F	5.1	9.3			0.968483	0.70757		0.634047
F	7.1	10.5			1.02119	0.851258		0.613325
F	7.31	10.4			1.01703	0.863917		0.649856
F	8	10.7			1.02938	0.90309		0.653038
F	6.5	9.9			0.995635	0.812913		0.669897
F	6.35	9.7			0.986772	0.802774		0.695759
F	12.72	13			1.11394	1.10449		0.578971
F	4.75	9.4			0.973128	0.676694		0.571887
F	6.3	10			1	0.799341		0.63
F	7.9	10.6			1.02531	0.897627		0.663299
F	3.75	8.1			0.908485	0.574031		0.705629
F	8.4	10.9			1.03743	0.924279		0.648634
F	11.42	12			1.07918	1.05767		0.66088
F	9.6	11.2			1.04922	0.982271		0.683309
F	10.5	11.7			1.06819	1.02119		0.655589
F	7	10.2			1.0086	0.845098		0.659626
F	8.15	10.7			1.02938	0.911158		0.665283
M	8.9	11			1.04139	0.94939		0.66867
M	8	10.2			1.0086	0.90309		0.753858
M	9.1	10.9			1.03743	0.959041		0.702687
M	9.4	11.4			1.0569	0.973128		0.634473
M	6.65	9.6			0.982271	0.822822		0.751637
M	10.35	11.3			1.05308	1.01494		0.717307
M	10.9	11.9			1.07555	1.03743		0.646823
M	8	11.1			1.04532	0.90309		0.584953
M	11.65	11.7			1.06819	1.06633		0.727392
M	8.1	10.6			1.02531	0.908485		0.680092
M	15.65	13.7			1.13672	1.19451		0.608629
M	9.7	11.2			1.04922	0.986772		0.690427
M	10.3	11.4			1.0569	1.01284		0.695221
M	11	11.4			1.0569	1.04139		0.742469
M	10.2	11.2			1.04922	1.0086		0.726016
M	7.62	10.4			1.01703	0.881955		0.677415
M	9.6	11.5			1.0607	0.982271		0.631216
M	10.85	11.5			1.0607	1.03543		0.713405
M	5.12	8.8			0.944483	0.70927		0.751315
M	7.2	10.3			1.01284	0.857332		0.658902
M	5.65	9.1			0.959041	0.752048		0.749763
M	7.2	10.2			1.0086	0.857332		0.678472
M	5.65	9			0.954243	0.752048		0.775034
M	7.7	10.5			1.02119	0.886491		0.665155
M	7.8	10.4			1.01703	0.892095		0.693417
M	5.5	9			0.954243	0.740363		0.754458
M	3.95	7.6			0.880814	0.596597		0.899821
M	4.3	7.8			0.892095	0.633468		0.906118
M	9.06	11			1.04139	0.957128		0.680691
M	8.32	10.8			1.03342	0.920123		0.660468
M	6.75	10.6			1.02531	0.829304		0.566743
M	8.81	10.9			1.03743	0.944976		0.680294
M	8.08	10.3			1.01284	0.907411		0.739434
M	9.4	10.9			1.03743	0.973128		0.725852
M	9.35	11.4			1.0569	0.970812		0.631098
M	6.65	9.6			0.982271	0.822822		0.751637
F	13.25	12.2			1.08636	1.12222		0.729687
F	13.35	12.4			1.09342	1.12548		0.70019
F	16.5	13.5			1.13033	1.21748		0.670629
F	10.8	11.5			1.0607	1.03342		0.710118
F	11.8	11.9			1.07555	1.07188		0.700231
F	10.6	11.4			1.0569	1.02531		0.71547
F	5.92	8.9			0.94939	0.772322		0.839753
F	6.57	10			1	0.817565		0.657
F	6.31	10			1	0.800029		0.631
F	4.42	8.5			0.929419	0.645422		0.719723
F	5.45	9			0.954243	0.736397		0.747599
F	3.96	8			0.90309	0.597695		0.773438
F	12.52	11.6			1.06446	1.0976		0.802103
F	8.82	10.5			1.02119	0.945469		0.761905
F	14	12.6			1.10037	1.14613		0.699868
F	15.5	13.1			1.11727	1.19033		0.689474
F	20	14			1.14613	1.30103		0.728863
F	10.6	11.6			1.06446	1.02531		0.679097
F	15.8	12.7			1.1038	1.19866		0.77134
F	19.6	13.6			1.13354	1.29226		0.779183
F	18.6	13.9			1.14301	1.26951		0.692578
F	14.5	12.7			1.1038	1.16137		0.707875
F	9.54	11.2			1.04922	0.979548		0.679038
F	10.64	11.6			1.06446	1.02694		0.68166
F	9.2	10.8			1.03342	0.963788		0.730326
M	5.5	8.6			0.934498	0.740363		0.864704
M	8.5	10.4			1.01703	0.929419		0.755647
M	9.7	11.2			1.04922	0.986772		0.690427
M	15.2	13			1.11394	1.18184		0.691853
M	34	16.2			1.20952	1.53148		0.799712
M	60	17.5			1.24304	1.77815		1.11953
M	9.35	11.4			1.0569	0.970812		0.631098
M	6.65	9.6			0.982271	0.822822		0.751637
M	10.8	11.5			1.0607	1.03342		0.710118
M	10.32	11.4			1.0569	1.01368		0.696571
M	12.7	12.3			1.08991	1.1038		0.682478
M	11.5	11.7			1.06819	1.0607		0.718026
M	8.5	9.9			0.995635	0.929419		0.876019
M	6.5	9			0.954243	0.812913		0.891632
M	12.7	12.3			1.08991	1.1038		0.682478
M	11.5	11.7			1.06819	1.0607		0.718026
M	9.4	10.9			1.03743	0.973128		0.725852
M	9.35	10.8			1.03342	0.970812		0.742233
M	10.4	11.4			1.0569	1.01703		0.70197
M	11	11.4			1.0569	1.04139		0.742469
M	12.85	12			1.07918	1.1089		0.743634
M	6.75	10.6			1.02531	0.829304		0.566743
M	8.81	10.9			1.03743	0.944976		0.680294
F	16.2	12.7			1.1038	1.20952		0.790868
F	13.2	12.2			1.08636	1.12057		0.726933
F	14	12.6			1.10037	1.14613		0.699868
F	15.5	13.1			1.11727	1.19033		0.689474
F	20	14			1.14613	1.30103		0.728863
F	10.6	11.6			1.06446	1.02531		0.679097
F	16.2	12.7			1.1038	1.20952		0.790868
F	19.6	13.6			1.13354	1.29226		0.779183
F	16.5	13.5			1.13033	1.21748		0.670629
F	10.8	11.5			1.0607	1.03342		0.710118
F	18.6	13.9			1.14301	1.26951		0.692578
F	9.2	10.8			1.03342	0.963788		0.730326
F	16.2	12.7			1.1038	1.20952		0.790868
F	13.2	12.2			1.08636	1.12057		0.726933
F	18.6	13.9			1.14301	1.26951		0.692578
F	9.2	10.8			1.03342	0.963788		0.730326
F	6.65	10			1	0.822822		0.665
F	6.3	10			1	0.799341		0.63
F	14.2	12			1.07918	1.15229		0.821759
F	15.5	13.1			1.11727	1.19033		0.689474
F	9.6	11.2			1.04922	0.982271		0.683309
F	10.5	11.7			1.06819	1.02119		0.655589
M	16.3	14			1.14613	1.21219		0.594023
M	9.2	11.5			1.0607	0.963788		0.604915
M	10.3	11.5			1.0607	1.01284		0.677242
M	15.05	13			1.11394	1.17754		0.685025
M	34	16.2			1.20952	1.53148		0.799712
M	60	17.5			1.24304	1.77815		1.11953
M	12.5	11.5			1.0607	1.09691		0.821895
M	7	10.1			1.00432	0.845098		0.679413
M	8.5	9.9			0.995635	0.929419		0.876019
M	6.5	9			0.954243	0.812913		0.891632
M	5.5	8.6			0.934498	0.740363		0.864704
M	8.5	10.4			1.01703	0.929419		0.755647
M	12	11.6			1.06446	1.07918		0.768789
M	14.5	12.2			1.08636	1.16137		0.798525
M	6.5	9.6			0.982271	0.812913		0.734682
M	10.6	11.5			1.0607	1.02531		0.696967
M	9	11			1.04139	0.954243		0.676183
M	12.85	12			1.07918	1.1089		0.743634
M	6.75	10.6			1.02531	0.829304		0.566743
M	8.81	10.9			1.03743	0.944976		0.680294
M	7.8	10.4			1.01703	0.892095		0.693417
M	9.4	10.9			1.03743	0.973128		0.725852
M	17.28	14			1.14613	1.23754		0.629738
M	16.31	14			1.14613	1.21245		0.594388
M	12.95	12.2			1.08636	1.11227		0.713165
M	12.21	12.6			1.10037	1.08672		0.610385
M	15	13			1.11394	1.17609		0.682749
M	11.88	12.3			1.08991	1.07482		0.638412
M	14.53	13.6			1.13354	1.16227		0.577629
M	13.74	13.1			1.11727	1.13799		0.611185
M	20.03	14.7			1.16732	1.30168		0.630564
M	11.59	12.4			1.09342	1.06408		0.607881
M	12.29	13.3			1.12385	1.08955		0.522393
M	6.5	10			1	0.812913		0.65
M	5.75	9.6			0.982271	0.759668		0.649911
M	7.1	10.5			1.02119	0.851258		0.613325
M	4.52	9.2			0.963788	0.655138		0.580464
M	4.4	9.1			0.959041	0.643453		0.583887
M	11.65	12.2			1.08636	1.06633		0.641574
M	8.65	11.4			1.0569	0.937016		0.58385
M	21.5	15.4			1.18752	1.33244		0.588676
M	4.72	9			0.954243	0.673942		0.647462
M	3.95	8.6			0.934498	0.596597		0.621015
M	16.45	13.6			1.13354	1.21617		0.653957
M	9.95	12			1.07918	0.997823		0.57581
M	9.04	11.2			1.04922	0.956168		0.643449
M	10.5	12			1.07918	1.02119		0.607639
M	11.54	12.2			1.08636	1.06221		0.635516
M	7.22	10.9			1.03743	0.858537		0.557516
M	7.1	10.7			1.02938	0.851258		0.579571
M	5.43	9.4			0.973128	0.7348		0.653757
M	4.85	9.6			0.982271	0.685742		0.548186
M	5.23	9.4			0.973128	0.718502		0.629677
M	2.43	7.3			0.863323	0.385606		0.624651
M	11.59	12.4			1.09342	1.06408		0.607881
M	12.29	13.3			1.12385	1.08955		0.522393
M	13.95	13.6			1.13354	1.14457		0.554571
M	5.43	9.4			0.973128	0.7348		0.653757
M	10.99	12.4			1.09342	1.041		0.576412
M	7.73	10.6			1.02531	0.888179		0.649026
M	7.1	10.5			1.02119	0.851258		0.613325
M	4.52	9.2			0.963788	0.655138		0.580464
M	21	15.4			1.18752	1.32222		0.574986
M	4.72	9			0.954243	0.673942		0.647462
M	3.95	8.6			0.934498	0.596597		0.621015
M	16.6	13.6			1.13354	1.22011		0.65992
M	9.95	12			1.07918	0.997823		0.57581
M	9.04	11.2			1.04922	0.956168		0.643449
M	10.5	12			1.07918	1.02119		0.607639
M	12	12.5			1.09691	1.07918		0.6144
M	7.22	10.9			1.03743	0.858537		0.557516
M	6.96	10.5			1.02119	0.842609		0.601231
M	4.44	8.9			0.94939	0.647383		0.629815
M	4.59	9.1			0.959041	0.661813		0.6091
M	11.5	12.2			1.08636	1.0607		0.633313
M	8.6	11.4			1.0569	0.934498		0.580476
M	5.3	9.2			0.963788	0.724276		0.680632
M	4.52	9.2			0.963788	0.655138		0.580464
M	4.4	9.1			0.959041	0.643453		0.583887
M	11.65	12.2			1.08636	1.06633		0.641574
M	8.65	11.4			1.0569	0.937016		0.58385
M	5.8	9.9			0.995635	0.763428		0.597754
M	4.5	9.3			0.968483	0.653213		0.559453
M	5.45	9.6			0.982271	0.736397		0.616003
M	7.1	10.7			1.02938	0.851258		0.579571
M	5.3	9.4			0.973128	0.724276		0.638105
M	4.85	9.6			0.982271	0.685742		0.548186
M	5.2	9.4			0.973128	0.716003		0.626066
M	2.4	7.3			0.863323	0.380211		0.61694
M	15.74	12.6			1.10037	1.197		0.786852
M	13.96	12.7			1.1038	1.14489		0.681513
M	10.72	11.41			1.05729	1.03019		0.721669
M	13.37	12.3			1.08991	1.12613		0.718482
M	8.33	10.1			1.00432	0.920645		0.808502
M	5.34	8.9			0.94939	0.727541		0.75748
M	9.76	11.2			1.04922	0.98945		0.694698
M	14.35	12.5			1.09691	1.15685		0.73472
M	12.46	12			1.07918	1.09552		0.721065
M	11.39	11.6			1.06446	1.05652		0.729709
M	12.3	11.6			1.06446	1.08991		0.788009
M	4.38	12.3			1.08991	0.641474		0.235374
M	13.81	12.2			1.08636	1.14019		0.760526
M	12.49	12			1.07918	1.09656		0.722801
M	6.05	9.5			0.977724	0.781755		0.705642
M	9.7	11.2			1.04922	0.986772		0.690427
M	10.3	11.4			1.0569	1.01284		0.695221
M	11	11.4			1.0569	1.04139		0.742469
M	10.2	11.2			1.04922	1.0086		0.726016
M	7.62	10.4			1.01703	0.881955		0.677415
M	9.6	11.5			1.0607	0.982271		0.631216
M	10.85	11.5			1.0607	1.03543		0.713405
M	5.12	8.8			0.944483	0.70927		0.751315
M	7.2	10.3			1.01284	0.857332		0.658902
M	5.65	9.1			0.959041	0.752048		0.749763
M	7.2	10.2			1.0086	0.857332		0.678472
M	5.65	9			0.954243	0.752048		0.775034
M	7.7	10.5			1.02119	0.886491		0.665155
M	7.8	10.4			1.01703	0.892095		0.693417
M	5.5	9			0.954243	0.740363		0.754458
M	3.95	7.6			0.880814	0.596597		0.899821
M	4.3	7.8			0.892095	0.633468		0.906118
M	3.8	6.4			0.80618	0.579784		1.44958
M	9.06	11			1.04139	0.957128		0.680691
M	8.32	10.8			1.03342	0.920123		0.660468
M	6.75	10.6			1.02531	0.829304		0.566743
M	8.81	10.9			1.03743	0.944976		0.680294
M	8.08	10.3			1.01284	0.907411		0.739434
M	9.4	10.9			1.03743	0.973128		0.725852
M	9.35	11.4			1.0569	0.970812		0.631098
M	6.65	9.6			0.982271	0.822822		0.751637
M	10.35	11.3			1.05308	1.01494		0.717307
M	10.87	11.9			1.07555	1.03623		0.645043
M	8.03	11.1			1.04532	0.904716		0.587147
M	11.68	11.7			1.06819	1.06744		0.729265
M	10.78	11.6			1.06446	1.03262		0.690629
M	8.75	11			1.04139	0.942008		0.6574
M	7.43	10.3			1.01284	0.870989		0.67995
M	16.75	13.8			1.13988	1.22401		0.637349
M	5.75	9.5			0.977724	0.759668		0.670652
M	10.27	11.2			1.04922	1.01157		0.730998
M	9.7	11.2			1.04922	0.986772		0.690427
M	15.2	13			1.11394	1.18184		0.691853
M	8.08	10.6			1.02531	0.907411		0.678412
M	15.61	13.7			1.13672	1.1934		0.607073
M	9.73	11.2			1.04922	0.988113		0.692562
M	10.32	11.4			1.0569	1.01368		0.696571
M	11	11.4			1.0569	1.04139		0.742469
M	10.2	11.2			1.04922	1.0086		0.726016
M	7.62	10.4			1.01703	0.881955		0.677415
M	9.6	11.5			1.0607	0.982271		0.631216
M	12.7	12.3			1.08991	1.1038		0.682478
M	16.15	14			1.14613	1.20817		0.588557
M	8.45	10.7			1.02938	0.926857		0.689772
M	12.92	12.1			1.08279	1.11126		0.7293
M	6.47	9.9			0.995635	0.810904		0.666805
M	6.56	9.8			0.991226	0.816904		0.696988
M	8.62	11.1			1.04532	0.935507		0.630287
M	8.72	11.1			1.04532	0.940516		0.637599
M	10.85	11.5			1.0607	1.03543		0.713405
M	5.12	8.8			0.944483	0.70927		0.751315
M	7.18	10.3			1.01284	0.856124		0.657072
M	5.62	9.1			0.959041	0.749736		0.745782
M	7.67	10.5			1.02119	0.884795		0.662563
M	7.72	10.4			1.01703	0.887617		0.686305
M	5.24	9			0.954243	0.719331		0.718793
M	3.92	7.7			0.886491	0.593286		0.858645
M	4.22	7.6			0.880814	0.625312		0.961328
M	8.5	10.4			1.01703	0.929419		0.755647
M	12	11.6			1.06446	1.07918		0.768789
M	3.6	7.4			0.869232	0.556303		0.888398
M	4.9	8.2			0.913814	0.690196		0.888699
M	6.4	9.8			0.991226	0.80618		0.679989
M	4.7	8.2			0.913814	0.672098		0.852425
M	11.2	11			1.04139	1.04922		0.841473
M	16.5	13.6			1.13354	1.21748		0.655945
M	8.4	10.9			1.03743	0.924279		0.648634
M	10	11			1.04139	1		0.751315
M	6	8.9			0.94939	0.778151		0.851101
M	5.4	8.5			0.929419	0.732394		0.8793
M	9.4	10.9			1.03743	0.973128		0.725852
M	9	10.2			1.0086	0.954243		0.84809
M	10.4	11.4			1.0569	1.01703		0.70197
M	11	11.4			1.0569	1.04139		0.742469
M	12.4	11.8			1.07188	1.09342		0.754702
M	6.6	9.1			0.959041	0.819544		0.87583
M	8.6	10.6			1.02531	0.934498		0.722073
M	9.7	11.2			1.04922	0.986772		0.690427
M	14.6	12.7			1.1038	1.16435		0.712757
M	34	16.2			1.20952	1.53148		0.799712
M	60	17.5			1.24304	1.77815		1.11953
M	9.1	10.2			1.0086	0.959041		0.857513
M	6.2	9			0.954243	0.792392		0.85048
M	10.8	11.5			1.0607	1.03342		0.710118
M	10	11.1			1.04532	1		0.731191
M	12.7	12.3			1.08991	1.1038		0.682478
M	11.5	11.7			1.06819	1.0607		0.718026
M	8.5	9.9			0.995635	0.929419		0.876019
M	6.5	9			0.954243	0.812913		0.891632
M	12.7	12.3			1.08991	1.1038		0.682478
M	11.5	11.7			1.06819	1.0607		0.718026
M	34	16.2			1.20952	1.53148		0.799712
M	60	17.5			1.24304	1.77815		1.11953
M	12.5	11.5			1.0607	1.09691		0.821895
M	7	10.1			1.00432	0.845098		0.679413
M	8.5	9.9			0.995635	0.929419		0.876019
M	6.5	9			0.954243	0.812913		0.891632
M	5.5	8.6			0.934498	0.740363		0.864704
M	8.5	10.4			1.01703	0.929419		0.755647
M	12	11.6			1.06446	1.07918		0.768789
M	14.5	12.2			1.08636	1.16137		0.798525
M	6.5	9.6			0.982271	0.812913		0.734682
M	10.6	11.5			1.0607	1.02531		0.696967
M	9	11			1.04139	0.954243		0.676183
M	12.85	12			1.07918	1.1089		0.743634
M	6.75	10.6			1.02531	0.829304		0.566743
M	8.81	10.9			1.03743	0.944976		0.680294
M	7.8	10.4			1.01703	0.892095		0.693417
M	9.4	10.9			1.03743	0.973128		0.725852
M	9.35	11.4			1.0569	0.970812		0.631098
M	6.65	9.6			0.982271	0.822822		0.751637
M	16.15	14			1.14613	1.20817		0.588557
M	16.3	14			1.14613	1.21219		0.594023
M	9.2	11.5			1.0607	0.963788		0.604915
M	10.3	11.5			1.0607	1.01284		0.677242
M	15.05	13			1.11394	1.17754		0.685025
M	17.28	14			1.14613	1.23754		0.629738
M	16.31	14			1.14613	1.21245		0.594388
M	12.95	12.2			1.08636	1.11227		0.713165
M	12.21	12.6			1.10037	1.08672		0.610385
M	15.45	13			1.11394	1.18893		0.703232
M	14.75	13.5			1.13033	1.16879		0.599502
M	5.77	9.7			0.986772	0.761176		0.632209
M	14.52	13.2			1.12057	1.16197		0.631313
M	8.84	11.3			1.05308	0.946452		0.612656
M	6.56	9.8			0.991226	0.816904		0.696988
M	8.62	11.1			1.04532	0.935507		0.630287
M	8.72	11.1			1.04532	0.940516		0.637599
M	10.85	11.5			1.0607	1.03543		0.713405
M	5.12	8.8			0.944483	0.70927		0.751315
M	5.5	8.6			0.934498	0.740363		0.864704
M	8.5	10.4			1.01703	0.929419		0.755647
M	12	11.6			1.06446	1.07918		0.768789
M	14.5	12.2			1.08636	1.16137		0.798525
M	6.5	9.6			0.982271	0.812913		0.734682
F	32.92	17.6			1.24551	1.51746		0.60384
F	25.38	16			1.20412	1.40449		0.619629
F	16.29	14			1.14613	1.21192		0.593659
F	15.58	13.7			1.13672	1.19257		0.605907
F	18.99	14.5			1.16137	1.27852		0.622904
F	20	14.5			1.16137	1.30103		0.656033
F	15.31	13.4			1.1271	1.18498		0.636298
F	18.39	14.5			1.16137	1.26458		0.603223
F	14.3	13.3			1.12385	1.15534		0.607829
F	13.98	12.4			1.09342	1.14551		0.733233
F	14.8	13.1			1.11727	1.17026		0.658336
F	9.33	12			1.07918	0.969882		0.539931
F	11	11.5			1.0607	1.04139		0.723268
F	11.83	12.6			1.10037	1.07298		0.591389
F	10.64	11.9			1.07555	1.02694		0.631394
F	12.27	13			1.11394	1.08884		0.558489
F	8.27	10.6			1.02531	0.917506		0.694365
F	4.57	9.5			0.977724	0.659916		0.533022
F	11.42	12			1.07918	1.05767		0.66088
F	9.6	11.2			1.04922	0.982271		0.683309
F	10.5	11.7			1.06819	1.02119		0.655589
F	7	10.2			1.0086	0.845098		0.659626
F	8.15	10.7			1.02938	0.911158		0.665283
F	9.18	10.5			1.02119	0.962843		0.793003
F	9.44	11.2			1.04922	0.974972		0.671921
F	12.13	11.7			1.06819	1.08386		0.757361
F	12.42	12.2			1.08636	1.09412		0.683978
F	5.68	9.2			0.963788	0.754348		0.729432
F	8.4	10.9			1.03743	0.924279		0.648634
F	13.25	12.2			1.08636	1.12222		0.729687
F	13.35	12.4			1.09342	1.12548		0.70019
F	16.5	13.5			1.13033	1.21748		0.670629
F	10.8	11.5			1.0607	1.03342		0.710118
F	11.8	11.9			1.07555	1.07188		0.700231
F	10.6	11.4			1.0569	1.02531		0.71547
F	12.08	12.5			1.09691	1.08207		0.618496
F	10.18	12			1.07918	1.00775		0.58912
F	5.68	9.7			0.986772	0.754348		0.622348
F	13.17	12.9			1.11059	1.11959		0.613503
F	12.12	12.7			1.1038	1.0835		0.591686
F	6.41	10.6			1.02531	0.806858		0.538196
F	12.67	13			1.11394	1.10278		0.576695
F	17	13.9			1.14301	1.23045		0.633001
F	10.1	12.2			1.08636	1.00432		0.556214
F	15.23	13.5			1.13033	1.1827		0.619011
F	18.83	14.5			1.16137	1.27485		0.617656
F	12.83	13.3			1.12385	1.10823		0.545345
F	11.42	12			1.07918	1.05767		0.66088
F	9.6	11.2			1.04922	0.982271		0.683309
F	10.5	11.7			1.06819	1.02119		0.655589
F	7	10.2			1.0086	0.845098		0.659626
F	8.15	10.7			1.02938	0.911158		0.665283
F	8.3	10.7			1.02938	0.919078		0.677527
F	12.7	13			1.11394	1.1038		0.578061
F	4.78	9.6			0.982271	0.679428		0.540274
F	10.15	11.8			1.07188	1.00647		0.61776
F	5.26	9.3			0.968483	0.720986		0.653938
F	6.84	10.5			1.02119	0.835056		0.590865
M	11.88	12.3			1.08991	1.07482		0.638412
M	14.53	13.6			1.13354	1.16227		0.577629
M	13.74	13.1			1.11727	1.13799		0.611185
M	20.03	14.7			1.16732	1.30168		0.630564
M	11.59	12.4			1.09342	1.06408		0.607881
M	12.29	13.3			1.12385	1.08955		0.522393
M	13.95	13.6			1.13354	1.14457		0.554571
M	15.18	13.7			1.13672	1.18127		0.590351
M	11.11	12.7			1.1038	1.04571		0.542379
M	17.33	14.5			1.16137	1.2388		0.568453
M	10.99	12.4			1.09342	1.041		0.576412
M	7.73	10.6			1.02531	0.888179		0.649026
M	7.1	10.5			1.02119	0.851258		0.613325
M	4.52	9.2			0.963788	0.655138		0.580464
M	4.4	9.1			0.959041	0.643453		0.583887
M	11.65	12.2			1.08636	1.06633		0.641574
M	8.65	11.4			1.0569	0.937016		0.58385
M	2.43	7.3			0.863323	0.385606		0.624651
M	4.72	9			0.954243	0.673942		0.647462
M	3.95	8.6			0.934498	0.596597		0.621015
M	16.45	13.6			1.13354	1.21617		0.653957
M	9.95	12			1.07918	0.997823		0.57581
M	9.04	11.2			1.04922	0.956168		0.643449
M	10.5	12			1.07918	1.02119		0.607639
M	11.54	12.2			1.08636	1.06221		0.635516
M	7.22	10.9			1.03743	0.858537		0.557516
M	7.1	10.7			1.02938	0.851258		0.579571
M	5.43	9.4			0.973128	0.7348		0.653757
M	4.85	9.6			0.982271	0.685742		0.548186
M	5.23	9.4			0.973128	0.718502		0.629677
M	21.18	15.2			1.18184	1.32593		0.603108
M	4.72	9			0.954243	0.673942		0.647462
M	3.95	8.6			0.934498	0.596597		0.621015
M	16.45	13.6			1.13354	1.21617		0.653957
M	9.95	12			1.07918	0.997823		0.57581
M	9.04	11.2			1.04922	0.956168		0.643449
M	10.5	12			1.07918	1.02119		0.607639
M	11.54	12.2			1.08636	1.06221		0.635516
M	7.22	10.9			1.03743	0.858537		0.557516
M	6.96	10.5			1.02119	0.842609		0.601231
M	4.44	8.9			0.94939	0.647383		0.629815
M	4.59	9.1			0.959041	0.661813		0.6091
M	11.65	12.2			1.08636	1.06633		0.641574
M	8.58	11.4			1.0569	0.933487		0.579126
M	5.3	9.2			0.963788	0.724276		0.680632
M	6.61	10			1	0.820201		0.661
M	5.15	9.5			0.977724	0.711807		0.600671
M	6.53	10			1	0.814913		0.653
M	5.73	9.6			0.982271	0.758155		0.647651
M	5.8	9.9			0.995635	0.763428		0.597754
M	4.5	9.3			0.968483	0.653213		0.559453
M	5.45	9.6			0.982271	0.736397		0.616003
M	7.1	10.7			1.02938	0.851258		0.579571
M	5.43	9.4			0.973128	0.7348		0.653757
M	4.85	9.6			0.982271	0.685742		0.548186
M	5.23	9.4			0.973128	0.718502		0.629677
M	2.43	7.3			0.863323	0.385606		0.624651
M	9.06	11			1.04139	0.957128		0.680691
M	8.32	10.8			1.03342	0.920123		0.660468
M	6.75	10.6			1.02531	0.829304		0.566743
M	8.81	10.9			1.03743	0.944976		0.680294
M	8.08	10.3			1.01284	0.907411		0.739434
M	9.4	10.9			1.03743	0.973128		0.725852
M	9.35	11.4			1.0569	0.970812		0.631098
M	6.65	9.6			0.982271	0.822822		0.751637
M	10.35	11.3			1.05308	1.01494		0.717307
M	10.87	11.9			1.07555	1.03623		0.645043
M	8.03	11.1			1.04532	0.904716		0.587147
M	11.68	11.7			1.06819	1.06744		0.729265
M	10.78	11.6			1.06446	1.03262		0.690629
M	8.75	11			1.04139	0.942008		0.6574
M	7.43	10.3			1.01284	0.870989		0.67995
M	16.75	13.8			1.13988	1.22401		0.637349
M	5.75	9.5			0.977724	0.759668		0.670652
M	10.27	11.2			1.04922	1.01157		0.730998
M	9.7	11.2			1.04922	0.986772		0.690427
M	15.2	13			1.11394	1.18184		0.691853
M	8.08	10.6			1.02531	0.907411		0.678412
M	15.61	13.7			1.13672	1.1934		0.607073
M	9.73	11.2			1.04922	0.988113		0.692562
M	10.32	11.4			1.0569	1.01368		0.696571
M	11	11.4			1.0569	1.04139		0.742469
M	10.2	11.2			1.04922	1.0086		0.726016
M	7.62	10.4			1.01703	0.881955		0.677415
M	9.6	11.5			1.0607	0.982271		0.631216
M	12.7	12.3			1.08991	1.1038		0.682478
M	16.15	14			1.14613	1.20817		0.588557
M	8.45	10.7			1.02938	0.926857		0.689772
M	12.92	12.1			1.08279	1.11126		0.7293
M	6.47	9.9			0.995635	0.810904		0.666805
M	6.56	9.8			0.991226	0.816904		0.696988
M	8.62	11.1			1.04532	0.935507		0.630287
M	8.72	11.1			1.04532	0.940516		0.637599
M	10.85	11.5			1.0607	1.03543		0.713405
M	5.12	8.8			0.944483	0.70927		0.751315
M	7.18	10.3			1.01284	0.856124		0.657072
M	5.62	9.1			0.959041	0.749736		0.745782
M	7.67	10.5			1.02119	0.884795		0.662563
M	7.72	10.4			1.01703	0.887617		0.686305
M	5.24	9			0.954243	0.719331		0.718793
M	3.92	7.7			0.886491	0.593286		0.858645
M	4.22	7.6			0.880814	0.625312		0.961328

## Sheet: Pooled
Sex	Wt.(gm)	TL (cm)			LOG TL	LOG W		K
F	16.2	12.7			1.1038	1.20952		0.790868
F	13.2	12.2			1.08636	1.12057		0.726933
F	14	12.6			1.10037	1.14613		0.699868
F	15.5	13.1			1.11727	1.19033		0.689474
F	20	14			1.14613	1.30103		0.728863
F	10.6	11.6			1.06446	1.02531		0.679097
F	16.2	12.7			1.1038	1.20952		0.790868
F	19.6	13.6			1.13354	1.29226		0.779183
F	16.2	13			1.11394	1.20952		0.737369
F	10.8	11.5			1.0607	1.03342		0.710118
F	18.6	13.9			1.14301	1.26951		0.692578
F	9.2	10.8			1.03342	0.963788		0.730326
F	16.2	12.5			1.09691	1.20952		0.82944
F	13.2	12.2			1.08636	1.12057		0.726933
F	18.4	13.7			1.13672	1.26482		0.715577
F	9.2	10.8			1.03342	0.963788		0.730326							a	0.00916529
F	6.65	10			1	0.822822		0.665							a	0.00831948	0.0100971		0.00831948	0.0100971
F	6.3	10			1	0.799341		0.63
F	14.2	12			1.07918	1.15229		0.821759							SUMMARY OUTPUT
F	15.5	13.1			1.11727	1.19033		0.689474
F	9.6	11.2			1.04922	0.982271		0.683309							Regression Statistics
F	10.5	11.7			1.06819	1.02119		0.655589							Multiple R	0.966138
F	6.2	9			0.954243	0.792392		0.85048							R Square	0.933422
F	4.4	8.4			0.924279	0.643453		0.74236							Adjusted R Square	0.933375
F	5.5	9			0.954243	0.740363		0.754458							Standard Error	0.0518408
F	4	8			0.90309	0.60206		0.78125							Observations	1414
F	12.5	11.6			1.06446	1.09691		0.800822
F	13.2	12.2			1.08636	1.12057		0.726933							ANOVA
F	19.5	13.6			1.13354	1.29003		0.775207								df	SS	MS	F	Significance F
F	6.5	10			1	0.812913		0.65							Regression	1	53.2018	53.2018	19796.3	0
F	14	12.6			1.10037	1.14613		0.699868							Residual	1412	3.7947	0.00268747
F	15.5	13.1			1.11727	1.19033		0.689474							Total	1413	56.9965
F	20	14			1.14613	1.30103		0.728863
F	10.6	11.6			1.06446	1.02531		0.679097								Coefficients	Standard Error	t Stat	P-value	Lower 95%	Upper 95%	Lower 95.0%	Upper 95.0%
F	16.2	12.7			1.1038	1.20952		0.790868							Intercept	-2.03785	0.0214361	-95.0666	0	-2.0799	-1.9958	-2.0799	-1.9958
F	13.2	12.2			1.08636	1.12057		0.726933							X Variable 1	2.87838	0.0204577	140.699	0	2.83824	2.91851	2.83824	2.91851
F	10.6	11.4			1.0569	1.02531		0.71547
F	5.9	8.9			0.94939	0.770852		0.836916
F	6.5	10			1	0.812913		0.65
F	6.31	10			1	0.800029		0.631
F	4.42	8.5			0.929419	0.645422		0.719723
F	5.5	9			0.954243	0.740363		0.754458
F	4	8			0.90309	0.60206		0.78125
F	12.5	11.6			1.06446	1.09691		0.800822
F	13.2	12.2			1.08636	1.12057		0.726933
F	19.6	13.6			1.13354	1.29226		0.779183
F	16.5	13.5			1.13033	1.21748		0.670629
F	4.1	8			0.90309	0.612784		0.800781
F	12.5	11.5			1.0607	1.09691		0.821895
F	11.4	12.1			1.08279	1.0569		0.6435
F	9.9	11.2			1.04922	0.995635		0.704662
F	6.5	10			1	0.812913		0.65
F	14	12.6			1.10037	1.14613		0.699868
F	15.5	13.1			1.11727	1.19033		0.689474
F	20	14			1.14613	1.30103		0.728863
F	10.6	11.6			1.06446	1.02531		0.679097
F	16.2	12.7			1.1038	1.20952		0.790868
F	13.2	12.2			1.08636	1.12057		0.726933
F	10.6	11.4			1.0569	1.02531		0.71547
F	5.92	8.9			0.94939	0.772322		0.839753
F	6.57	10			1	0.817565		0.657
F	6.31	10			1	0.800029		0.631
F	4.42	8.5			0.929419	0.645422		0.719723
F	5.45	9			0.954243	0.736397		0.747599
F	3.96	8			0.90309	0.597695		0.773438
F	12.52	11.6			1.06446	1.0976		0.802103
F	13.2	12.2			1.08636	1.12057		0.726933
F	19.6	13.6			1.13354	1.29226		0.779183
F	16.5	13.5			1.13033	1.21748		0.670629
F	4.1	8			0.90309	0.612784		0.800781
F	12.5	11.5			1.0607	1.09691		0.821895
F	11.42	12.1			1.08279	1.05767		0.644629
F	9.9	11.2			1.04922	0.995635		0.704662
F	14	12.4			1.09342	1.14613		0.734282
F	14.8	13.1			1.11727	1.17026		0.658336
F	6.4	10.6			1.02531	0.80618		0.537356
F	14	12.6			1.10037	1.14613		0.699868
F	15.5	13.1			1.11727	1.19033		0.689474
F	20	14			1.14613	1.30103		0.728863
F	10.6	11.6			1.06446	1.02531		0.679097
F	16.2	12.7			1.1038	1.20952		0.790868
F	13.2	12.2			1.08636	1.12057		0.726933
F	10.6	11.4			1.0569	1.02531		0.71547
F	5.92	8.9			0.94939	0.772322		0.839753
F	6.57	10			1	0.817565		0.657
F	6.31	10			1	0.800029		0.631
F	4.42	8.5			0.929419	0.645422		0.719723
F	5.45	9			0.954243	0.736397		0.747599
F	3.96	8			0.90309	0.597695		0.773438
F	12.52	11.6			1.06446	1.0976		0.802103
F	23.5	15.2			1.18184	1.37107		0.669171
F	12.6	11.5			1.0607	1.10037		0.82847
F	22	15			1.17609	1.34242		0.651852
F	14.2	12			1.07918	1.15229		0.821759
F	15.5	13.1			1.11727	1.19033		0.689474
F	20.5	14.1			1.14922	1.31175		0.731302
F	10.4	11.5			1.0607	1.01703		0.683817
F	8.4	10.9			1.03743	0.924279		0.648634
F	9.6	11.2			1.04922	0.982271		0.683309
F	10.5	11.7			1.06819	1.02119		0.655589
F	7	10.2			1.0086	0.845098		0.659626
F	12.7	13			1.11394	1.1038		0.578061
F	17	13.9			1.14301	1.23045		0.633001
F	8.4	10.9			1.03743	0.924279		0.648634
F	9.44	11.2			1.04922	0.974972		0.671921
F	12.13	11.7			1.06819	1.08386		0.757361
F	12.42	12.2			1.08636	1.09412		0.683978
F	5.68	9.2			0.963788	0.754348		0.729432
F	8.4	10.9			1.03743	0.924279		0.648634
F	11.38	12			1.07918	1.05614		0.658565
F	13.2	12.9			1.11059	1.12057		0.6149
F	12.1	12.7			1.1038	1.08279		0.59071
F	6.45	10.6			1.02531	0.80956		0.541554
F	9.4	12			1.07918	0.973128		0.543981
F	9.9	11.2			1.04922	0.995635		0.704662
F	10.5	11.7			1.06819	1.02119		0.655589
F	7	10.2			1.0086	0.845098		0.659626
F	6.3	10			1	0.799341		0.63
F	7.9	10.6			1.02531	0.897627		0.663299
F	3.75	8.1			0.908485	0.574031		0.705629
F	8.4	10.9			1.03743	0.924279		0.648634
F	9.6	11.2			1.04922	0.982271		0.683309
F	10.5	11.7			1.06819	1.02119		0.655589
F	7	10.2			1.0086	0.845098		0.659626
F	8.15	10.7			1.02938	0.911158		0.665283
F	17	13.9			1.14301	1.23045		0.633001
F	8.4	10.9			1.03743	0.924279		0.648634
F	9.6	11.2			1.04922	0.982271		0.683309
F	10.5	11.7			1.06819	1.02119		0.655589
F	7	10.2			1.0086	0.845098		0.659626
F	8.15	10.7			1.02938	0.911158		0.665283
F	15.4	13.6			1.13354	1.18752		0.612215
F	18.83	14.5			1.16137	1.27485		0.617656
F	12.83	13.3			1.12385	1.10823		0.545345
F	11.42	12			1.07918	1.05767		0.66088
F	9.6	11.2			1.04922	0.982271		0.683309
F	10.5	11.7			1.06819	1.02119		0.655589
F	12.7	13			1.11394	1.1038		0.578061
F	4.78	9.6			0.982271	0.679428		0.540274
F	10.15	11.8			1.07188	1.00647		0.61776
F	5.26	9.3			0.968483	0.720986		0.653938
F	7.1	10.5			1.02119	0.851258		0.613325
F	7.31	10.4			1.01703	0.863917		0.649856
F	8	10.7			1.02938	0.90309		0.653038
F	6.5	9.9			0.995635	0.812913		0.669897
F	6.35	9.7			0.986772	0.802774		0.695759
F	12.9	13.1			1.11727	1.11059		0.57382
F	4.75	9.4			0.973128	0.676694		0.571887
F	6.3	10			1	0.799341		0.63
F	7.9	10.6			1.02531	0.897627		0.663299
F	3.75	8.1			0.908485	0.574031		0.705629
F	8.4	10.9			1.03743	0.924279		0.648634
F	11.5	12			1.07918	1.0607		0.665509
F	9.6	11.2			1.04922	0.982271		0.683309
F	10.5	11.7			1.06819	1.02119		0.655589
F	7	10.2			1.0086	0.845098		0.659626
F	8.15	10.7			1.02938	0.911158		0.665283
F	6.57	10			1	0.817565		0.657
F	6.31	10			1	0.800029		0.631
F	4.42	8.5			0.929419	0.645422		0.719723
F	5.45	9			0.954243	0.736397		0.747599
F	3.96	8			0.90309	0.597695		0.773438
F	12.52	11.6			1.06446	1.0976		0.802103
F	14	12.6			1.10037	1.14613		0.699868
F	15.5	13.1			1.11727	1.19033		0.689474
F	20	14			1.14613	1.30103		0.728863
F	10.6	11.6			1.06446	1.02531		0.679097
F	15.8	12.7			1.1038	1.19866		0.77134
F	19.6	13.6			1.13354	1.29226		0.779183
F	18.6	13.9			1.14301	1.26951		0.692578
F	13	13.2			1.12057	1.11394		0.565225
F	4.56	9.6			0.982271	0.658965		0.515408
F	10.3	11.9			1.07555	1.01284		0.611218
F	5.1	9.3			0.968483	0.70757		0.634047
F	7.1	10.5			1.02119	0.851258		0.613325
F	7.31	10.4			1.01703	0.863917		0.649856
F	8	10.7			1.02938	0.90309		0.653038
F	14	12.6			1.10037	1.14613		0.699868
F	15.5	13.1			1.11727	1.19033		0.689474
F	20	14			1.14613	1.30103		0.728863
F	10.6	11.6			1.06446	1.02531		0.679097
F	16.2	12.7			1.1038	1.20952		0.790868
F	13.2	12.2			1.08636	1.12057		0.726933
F	10.6	11.4			1.0569	1.02531		0.71547
F	5.92	8.9			0.94939	0.772322		0.839753
F	13.25	12.2			1.08636	1.12222		0.729687
F	13.35	12.4			1.09342	1.12548		0.70019
F	16.5	13.5			1.13033	1.21748		0.670629
F	10.8	11.5			1.0607	1.03342		0.710118
F	11.8	11.9			1.07555	1.07188		0.700231
F	10.6	11.4			1.0569	1.02531		0.71547
F	5.92	8.9			0.94939	0.772322		0.839753
F	6.57	10			1	0.817565		0.657
F	6.31	10			1	0.800029		0.631
F	4.42	8.5			0.929419	0.645422		0.719723
F	5.45	9			0.954243	0.736397		0.747599
F	3.96	8			0.90309	0.597695		0.773438
F	12.52	11.6			1.06446	1.0976		0.802103
F	8.82	10.5			1.02119	0.945469		0.761905
F	14	12.6			1.10037	1.14613		0.699868
F	15.5	13.1			1.11727	1.19033		0.689474
F	20	14			1.14613	1.30103		0.728863
F	10.6	11.6			1.06446	1.02531		0.679097
F	15.8	12.7			1.1038	1.19866		0.77134
F	19.6	13.6			1.13354	1.29226		0.779183
F	18.6	13.9			1.14301	1.26951		0.692578
F	14.5	12.7			1.1038	1.16137		0.707875
F	9.54	11.2			1.04922	0.979548		0.679038
F	10.64	11.6			1.06446	1.02694		0.68166
F	9.2	10.8			1.03342	0.963788		0.730326
F	6.5	10			1	0.812913		0.65
F	6.31	10			1	0.800029		0.631
F	4.42	8.5			0.929419	0.645422		0.719723
F	5.5	9			0.954243	0.740363		0.754458
F	4	8			0.90309	0.60206		0.78125
F	12.5	11.6			1.06446	1.09691		0.800822
F	13.2	12.2			1.08636	1.12057		0.726933
F	19.6	13.6			1.13354	1.29226		0.779183
F	16.5	13.5			1.13033	1.21748		0.670629
F	4.1	8			0.90309	0.612784		0.800781
F	12.5	11.5			1.0607	1.09691		0.821895
F	11.4	12.1			1.08279	1.0569		0.6435
F	9.9	11.2			1.04922	0.995635		0.704662
F	5.9	8.9			0.94939	0.770852		0.836916
F	6.5	10			1	0.812913		0.65
F	14	12.6			1.10037	1.14613		0.699868
F	15.5	13.1			1.11727	1.19033		0.689474
F	20	14			1.14613	1.30103		0.728863
F	10.6	11.6			1.06446	1.02531		0.679097
F	16.2	12.7			1.1038	1.20952		0.790868
F	13.2	12.2			1.08636	1.12057		0.726933
F	10.6	11.4			1.0569	1.02531		0.71547
F	14	12.6			1.10037	1.14613		0.699868
F	15.5	13.1			1.11727	1.19033		0.689474
F	20	14			1.14613	1.30103		0.728863
F	10.6	11.6			1.06446	1.02531		0.679097
F	16.2	12.7			1.1038	1.20952		0.790868
F	13.2	12.2			1.08636	1.12057		0.726933
F	10.6	11.4			1.0569	1.02531		0.71547
F	5.92	8.9			0.94939	0.772322		0.839753
F	6.57	10			1	0.817565		0.657
F	6.31	10			1	0.800029		0.631
F	4.42	8.5			0.929419	0.645422		0.719723
F	5.45	9			0.954243	0.736397		0.747599
F	3.96	8			0.90309	0.597695		0.773438
F	12.52	11.6			1.06446	1.0976		0.802103
F	23.5	15.2			1.18184	1.37107		0.669171
F	12.6	11.5			1.0607	1.10037		0.82847
F	22	15			1.17609	1.34242		0.651852
F	14.2	12			1.07918	1.15229		0.821759
F	15.5	13.1			1.11727	1.19033		0.689474
F	20.5	14.1			1.14922	1.31175		0.731302
F	10.4	11.5			1.0607	1.01703		0.683817
F	13	13.2			1.12057	1.11394		0.565225
F	4.56	9.6			0.982271	0.658965		0.515408
F	10.3	11.9			1.07555	1.01284		0.611218
F	5.1	9.3			0.968483	0.70757		0.634047
F	7.1	10.5			1.02119	0.851258		0.613325
F	7.31	10.4			1.01703	0.863917		0.649856
F	8	10.7			1.02938	0.90309		0.653038
F	6.5	9.9			0.995635	0.812913		0.669897
F	6.35	9.7			0.986772	0.802774		0.695759
F	12.72	13			1.11394	1.10449		0.578971
F	4.75	9.4			0.973128	0.676694		0.571887
F	6.3	10			1	0.799341		0.63
F	7.9	10.6			1.02531	0.897627		0.663299
F	3.75	8.1			0.908485	0.574031		0.705629
F	8.4	10.9			1.03743	0.924279		0.648634
F	11.42	12			1.07918	1.05767		0.66088
F	9.6	11.2			1.04922	0.982271		0.683309
F	10.5	11.7			1.06819	1.02119		0.655589
F	7	10.2			1.0086	0.845098		0.659626
F	8.15	10.7			1.02938	0.911158		0.665283
F	13.25	12.2			1.08636	1.12222		0.729687
F	13.35	12.4			1.09342	1.12548		0.70019
F	16.5	13.5			1.13033	1.21748		0.670629
F	10.8	11.5			1.0607	1.03342		0.710118
F	11.8	11.9			1.07555	1.07188		0.700231
F	10.6	11.4			1.0569	1.02531		0.71547
F	5.92	8.9			0.94939	0.772322		0.839753
F	6.57	10			1	0.817565		0.657
F	6.31	10			1	0.800029		0.631
F	4.42	8.5			0.929419	0.645422		0.719723
F	5.45	9			0.954243	0.736397		0.747599
F	3.96	8			0.90309	0.597695		0.773438
F	12.52	11.6			1.06446	1.0976		0.802103
F	8.82	10.5			1.02119	0.945469		0.761905
F	14	12.6			1.10037	1.14613		0.699868
F	15.5	13.1			1.11727	1.19033		0.689474
F	20	14			1.14613	1.30103		0.728863
F	10.6	11.6			1.06446	1.02531		0.679097
F	15.8	12.7			1.1038	1.19866		0.77134
F	19.6	13.6			1.13354	1.29226		0.779183
F	18.6	13.9			1.14301	1.26951		0.692578
F	14.5	12.7			1.1038	1.16137		0.707875
F	9.54	11.2			1.04922	0.979548		0.679038
F	10.64	11.6			1.06446	1.02694		0.68166
F	9.2	10.8			1.03342	0.963788		0.730326
F	11	11.5			1.0607	1.04139		0.723268
F	11.85	12.6			1.10037	1.07372		0.592389
F	66.5	20			1.30103	1.82282		0.83125
F	14.5	12.7			1.1038	1.16137		0.707875
F	4	8			0.90309	0.60206		0.78125
F	12.5	11.5			1.0607	1.09691		0.821895
F	23.5	15.2			1.18184	1.37107		0.669171
F	14	12.6			1.10037	1.14613		0.699868
F	15.5	13.1			1.11727	1.19033		0.689474
F	20	14			1.14613	1.30103		0.728863
F	10.6	11.6			1.06446	1.02531		0.679097
F	16.2	12.7			1.1038	1.20952		0.790868
F	13.2	12.2			1.08636	1.12057		0.726933
F	19.6	13.6			1.13354	1.29226		0.779183
F	16.5	13.5			1.13033	1.21748		0.670629
F	10.8	11.5			1.0607	1.03342		0.710118
F	18.6	13.9			1.14301	1.26951		0.692578
F	9.2	10.8			1.03342	0.963788		0.730326
F	8.82	10.5			1.02119	0.945469		0.761905
F	6.5	10			1	0.812913		0.65
F	11.38	12			1.07918	1.05614		0.658565
F	9.87	11.2			1.04922	0.994317		0.702527
F	10.5	11.7			1.06819	1.02119		0.655589
F	12.8	13.1			1.11727	1.10721		0.569372
F	17	13.9			1.14301	1.23045		0.633001
F	8.4	10.9			1.03743	0.924279		0.648634
F	7	10.2			1.0086	0.845098		0.659626
F	6.3	10			1	0.799341		0.63
F	7.9	10.6			1.02531	0.897627		0.663299
F	12.08	12.5			1.09691	1.08207		0.618496
F	10.18	12			1.07918	1.00775		0.58912
F	5.68	9.7			0.986772	0.754348		0.622348
F	13.17	12.9			1.11059	1.11959		0.613503
F	12.12	12.7			1.1038	1.0835		0.591686
F	6.41	10.6			1.02531	0.806858		0.538196
F	12.67	13			1.11394	1.10278		0.576695
F	17	13.9			1.14301	1.23045		0.633001
F	10.1	12.2			1.08636	1.00432		0.556214
F	11.38	12			1.07918	1.05614		0.658565
F	9.87	11.2			1.04922	0.994317		0.702527
F	10.5	11.7			1.06819	1.02119		0.655589
F	15.23	13.5			1.13033	1.1827		0.619011
F	18.83	14.5			1.16137	1.27485		0.617656
F	12.83	13.3			1.12385	1.10823		0.545345
F	11.42	12			1.07918	1.05767		0.66088
F	9.6	11.2			1.04922	0.982271		0.683309
F	10.5	11.7			1.06819	1.02119		0.655589
F	7	10.2			1.0086	0.845098		0.659626
F	8.15	10.7			1.02938	0.911158		0.665283
F	8.3	10.7			1.02938	0.919078		0.677527
F	12.7	13			1.11394	1.1038		0.578061
F	4.78	9.6			0.982271	0.679428		0.540274
F	10.15	11.8			1.07188	1.00647		0.61776
F	5.26	9.3			0.968483	0.720986		0.653938
F	6.84	10.5			1.02119	0.835056		0.590865
F	3.75	8.1			0.908485	0.574031		0.705629
F	8.4	10.9			1.03743	0.924279		0.648634
F	14.2	12.5			1.09691	1.15229		0.72704
F	13	13.2			1.12057	1.11394		0.565225
F	4.56	9.6			0.982271	0.658965		0.515408
F	10.3	11.9			1.07555	1.01284		0.611218
F	5.1	9.3			0.968483	0.70757		0.634047
F	8.4	10.9			1.03743	0.924279		0.648634
F	11.38	12			1.07918	1.05614		0.658565
F	9.87	11.2			1.04922	0.994317		0.702527
F	10.5	11.7			1.06819	1.02119		0.655589
F	7	10.2			1.0086	0.845098		0.659626
F	8.15	10.7			1.02938	0.911158		0.665283
F	12.08	12.5			1.09691	1.08207		0.618496
F	10.18	12			1.07918	1.00775		0.58912
F	5.68	9.7			0.986772	0.754348		0.622348
F	13.2	12.9			1.11059	1.12057		0.6149
F	6.84	10.5			1.02119	0.835056		0.590865
F	7.28	10.4			1.01703	0.862131		0.647189
F	7.98	10.7			1.02938	0.902003		0.651406
F	6.51	9.9			0.995635	0.813581		0.670927
F	6.47	9.7			0.986772	0.810904		0.708907
F	12.69	13			1.11394	1.10346		0.577606
F	4.77	9.4			0.973128	0.678518		0.574295
F	6.24	10			1	0.795185		0.624
F	7.98	10.6			1.02531	0.902003		0.670016
F	3.84	8.1			0.908485	0.584331		0.722564
F	12.7	13			1.11394	1.1038		0.578061
F	4.78	9.6			0.982271	0.679428		0.540274
F	10.15	11.8			1.07188	1.00647		0.61776
F	5.26	9.3			0.968483	0.720986		0.653938
F	6.84	10.5			1.02119	0.835056		0.590865
F	6.41	10.6			1.02531	0.806858		0.538196
F	12.67	13			1.11394	1.10278		0.576695
F	17	13.9			1.14301	1.23045		0.633001
F	10.8	11.5			1.0607	1.03342		0.710118
F	14.1	12.4			1.09342	1.14922		0.739527
F	9.88	10.7			1.02938	0.994757		0.806502
F	8.33	10.4			1.01703	0.920645		0.740534
F	14.42	12.4			1.09342	1.15897		0.756311
F	10.71	11.4			1.0569	1.02979		0.722894
F	9.18	10.5			1.02119	0.962843		0.793003
F	9.44	11.2			1.04922	0.974972		0.671921
F	12.13	11.7			1.06819	1.08386		0.757361
F	12.42	12.2			1.08636	1.09412		0.683978
F	5.68	9.2			0.963788	0.754348		0.729432
F	3.43	8			0.90309	0.535294		0.669922
F	7.04	9.9			0.995635	0.847573		0.72555
F	7.16	10.3			1.01284	0.854913		0.655241
F	13	13.2			1.12057	1.11394		0.565225
F	4.56	9.6			0.982271	0.658965		0.515408
F	10.3	11.9			1.07555	1.01284		0.611218
F	5.1	9.3			0.968483	0.70757		0.634047
F	7.1	10.5			1.02119	0.851258		0.613325
F	7.31	10.4			1.01703	0.863917		0.649856
F	8	10.7			1.02938	0.90309		0.653038
F	6.5	9.9			0.995635	0.812913		0.669897
F	6.35	9.7			0.986772	0.802774		0.695759
F	12.72	13			1.11394	1.10449		0.578971
F	4.75	9.4			0.973128	0.676694		0.571887
F	5.26	9.3			0.968483	0.720986		0.653938
F	6.84	10.5			1.02119	0.835056		0.590865
F	7.28	10.4			1.01703	0.862131		0.647189
F	7.98	10.7			1.02938	0.902003		0.651406
F	6.51	9.9			0.995635	0.813581		0.670927
F	9.6	11.2			1.04922	0.982271		0.683309
F	10.5	11.7			1.06819	1.02119		0.655589
F	7	10.2			1.0086	0.845098		0.659626
F	8.15	10.7			1.02938	0.911158		0.665283
F	12.47	11.6			1.06446	1.09587		0.7989
F	23.1	15.1			1.17898	1.36361		0.670936
F	14.14	12.7			1.1038	1.15045		0.690301
F	15.24	13			1.11394	1.18298		0.693673
F	20	14			1.14613	1.30103		0.728863
F	10.43	11.5			1.0607	1.01828		0.685789
F	15.56	12.7			1.1038	1.19201		0.759624
F	19.52	13.8			1.13988	1.29048		0.74275
F	18.6	13.9			1.14301	1.26951		0.692578
F	14.5	12.7			1.1038	1.16137		0.707875
F	9.54	11.2			1.04922	0.979548		0.679038
F	10.64	11.6			1.06446	1.02694		0.68166
F	13.26	12.2			1.08636	1.12254		0.730237
F	13.35	12.4			1.09342	1.12548		0.70019
F	16.61	13.5			1.13033	1.22037		0.6751
F	10.8	11.5			1.0607	1.03342		0.710118
F	11.8	11.9			1.07555	1.07188		0.700231
F	10.6	11.4			1.0569	1.02531		0.71547
F	9.05	10.8			1.03342	0.956649		0.718418
F	8.75	10.8			1.03342	0.942008		0.694603
F	5.92	8.9			0.94939	0.772322		0.839753
F	6.57	10			1	0.817565		0.657
F	6.31	10			1	0.800029		0.631
F	4.42	8.5			0.929419	0.645422		0.719723
F	5.45	9			0.954243	0.736397		0.747599
F	3.96	8			0.90309	0.597695		0.773438
F	10.5	11.7			1.06819	1.02119		0.655589
F	6.2	9			0.954243	0.792392		0.85048
F	4.4	8.4			0.924279	0.643453		0.74236
F	5.5	9			0.954243	0.740363		0.754458
F	4	8			0.90309	0.60206		0.78125
F	12.5	11.6			1.06446	1.09691		0.800822
F	13.2	12.2			1.08636	1.12057		0.726933
F	19.5	13.6			1.13354	1.29003		0.775207
F	13.2	12.2			1.08636	1.12057		0.726933
F	14	12.6			1.10037	1.14613		0.699868
F	15.5	13.1			1.11727	1.19033		0.689474
F	20	14			1.14613	1.30103		0.728863
F	10.6	11.6			1.06446	1.02531		0.679097
F	16.2	12.7			1.1038	1.20952		0.790868
F	19.6	13.6			1.13354	1.29226		0.779183
F	16.2	13			1.11394	1.20952		0.737369
F	10.8	11.5			1.0607	1.03342		0.710118
F	18.6	13.9			1.14301	1.26951		0.692578
F	9.2	10.8			1.03342	0.963788		0.730326
F	16.2	12.5			1.09691	1.20952		0.82944
F	13.2	12.2			1.08636	1.12057		0.726933
F	18.4	13.7			1.13672	1.26482		0.715577
F	9.2	10.8			1.03342	0.963788		0.730326
F	6.65	10			1	0.822822		0.665
F	6.3	10			1	0.799341		0.63
F	14.2	12			1.07918	1.15229		0.821759
F	15.5	13.1			1.11727	1.19033		0.689474
F	9.6	11.2			1.04922	0.982271		0.683309
F	66.5	20			1.30103	1.82282		0.83125
F	14.5	12.7			1.1038	1.16137		0.707875
F	4	8			0.90309	0.60206		0.78125
F	12.5	11.5			1.0607	1.09691		0.821895
F	23.5	15.2			1.18184	1.37107		0.669171
F	14	12.6			1.10037	1.14613		0.699868
F	15.5	13.1			1.11727	1.19033		0.689474
F	20	14			1.14613	1.30103		0.728863
F	10.6	11.6			1.06446	1.02531		0.679097
F	16.2	12.7			1.1038	1.20952		0.790868
F	13.2	12.2			1.08636	1.12057		0.726933
F	19.6	13.6			1.13354	1.29226		0.779183
F	16.5	13.5			1.13033	1.21748		0.670629
F	10.8	11.5			1.0607	1.03342		0.710118
F	18.6	13.9			1.14301	1.26951		0.692578
F	9.2	10.8			1.03342	0.963788		0.730326
F	8.82	10.5			1.02119	0.945469		0.761905
F	6.5	10			1	0.812913		0.65
F	9.5	11			1.04139	0.977724		0.713749
F	32.92	17.6			1.24551	1.51746		0.60384
F	25.38	16			1.20412	1.40449		0.619629
F	16.29	14			1.14613	1.21192		0.593659
F	15.58	13.7			1.13672	1.19257		0.605907
F	18.99	14.5			1.16137	1.27852		0.622904
F	20	14.5			1.16137	1.30103		0.656033
F	15.31	13.4			1.1271	1.18498		0.636298
F	18.39	14.5			1.16137	1.26458		0.603223
F	14.3	13.3			1.12385	1.15534		0.607829
F	13.98	12.4			1.09342	1.14551		0.733233
F	14.8	13.1			1.11727	1.17026		0.658336
F	9.33	12			1.07918	0.969882		0.539931
F	11	11.5			1.0607	1.04139		0.723268
F	11.83	12.6			1.10037	1.07298		0.591389
F	10.64	11.9			1.07555	1.02694		0.631394
F	12.27	13			1.11394	1.08884		0.558489
F	8.27	10.6			1.02531	0.917506		0.694365
F	4.57	9.5			0.977724	0.659916		0.533022
F	11.42	12			1.07918	1.05767		0.66088
F	9.6	11.2			1.04922	0.982271		0.683309
F	10.5	11.7			1.06819	1.02119		0.655589
F	7	10.2			1.0086	0.845098		0.659626
F	8.15	10.7			1.02938	0.911158		0.665283
F	9.18	10.5			1.02119	0.962843		0.793003
F	9.44	11.2			1.04922	0.974972		0.671921
F	12.13	11.7			1.06819	1.08386		0.757361
F	12.42	12.2			1.08636	1.09412		0.683978
F	5.68	9.2			0.963788	0.754348		0.729432
F	8.4	10.9			1.03743	0.924279		0.648634
F	13.25	12.2			1.08636	1.12222		0.729687
F	13.35	12.4			1.09342	1.12548		0.70019
F	16.5	13.5			1.13033	1.21748		0.670629
F	10.8	11.5			1.0607	1.03342		0.710118
F	11.8	11.9			1.07555	1.07188		0.700231
F	10.6	11.4			1.0569	1.02531		0.71547
F	12.08	12.5			1.09691	1.08207		0.618496
F	10.18	12			1.07918	1.00775		0.58912
F	5.68	9.7			0.986772	0.754348		0.622348
F	13.17	12.9			1.11059	1.11959		0.613503
F	12.12	12.7			1.1038	1.0835		0.591686
F	6.41	10.6			1.02531	0.806858		0.538196
F	12.67	13			1.11394	1.10278		0.576695
F	17	13.9			1.14301	1.23045		0.633001
F	10.1	12.2			1.08636	1.00432		0.556214
F	15.23	13.5			1.13033	1.1827		0.619011
F	18.83	14.5			1.16137	1.27485		0.617656
F	12.83	13.3			1.12385	1.10823		0.545345
F	11.42	12			1.07918	1.05767		0.66088
F	9.6	11.2			1.04922	0.982271		0.683309
F	10.5	11.7			1.06819	1.02119		0.655589
F	7	10.2			1.0086	0.845098		0.659626
F	8.15	10.7			1.02938	0.911158		0.665283
F	8.3	10.7			1.02938	0.919078		0.677527
F	12.7	13			1.11394	1.1038		0.578061
F	4.78	9.6			0.982271	0.679428		0.540274
F	10.15	11.8			1.07188	1.00647		0.61776
F	5.26	9.3			0.968483	0.720986		0.653938
F	6.84	10.5			1.02119	0.835056		0.590865
F	8.4	10.9			1.03743	0.924279		0.648634
F	11.38	12			1.07918	1.05614		0.658565
F	9.87	11.2			1.04922	0.994317		0.702527
F	10.5	11.7			1.06819	1.02119		0.655589
F	7	10.2			1.0086	0.845098		0.659626
F	8.15	10.7			1.02938	0.911158		0.665283
F	12.7	13			1.11394	1.1038		0.578061
F	4.78	9.6			0.982271	0.679428		0.540274
F	10.15	11.8			1.07188	1.00647		0.61776
F	5.26	9.3			0.968483	0.720986		0.653938
F	6.84	10.5			1.02119	0.835056		0.590865
F	7.28	10.4			1.01703	0.862131		0.647189
F	7.98	10.7			1.02938	0.902003		0.651406
F	6.51	9.9			0.995635	0.813581		0.670927
F	6.47	9.7			0.986772	0.810904		0.708907
F	12.69	13			1.11394	1.10346		0.577606
F	4.77	9.4			0.973128	0.678518		0.574295
F	6.24	10			1	0.795185		0.624
F	7.98	10.6			1.02531	0.902003		0.670016
F	3.84	8.1			0.908485	0.584331		0.722564
F	12.47	11.6			1.06446	1.09587		0.7989
F	23.1	15.1			1.17898	1.36361		0.670936
F	14.14	12.7			1.1038	1.15045		0.690301
F	15.24	13			1.11394	1.18298		0.693673
F	20	14			1.14613	1.30103		0.728863
F	10.43	11.5			1.0607	1.01828		0.685789
F	15.56	12.7			1.1038	1.19201		0.759624
F	19.52	13.8			1.13988	1.29048		0.74275
F	18.6	13.9			1.14301	1.26951		0.692578
F	14.5	12.7			1.1038	1.16137		0.707875
F	9.54	11.2			1.04922	0.979548		0.679038
F	10.64	11.6			1.06446	1.02694		0.68166
F	13.26	12.2			1.08636	1.12254		0.730237
F	13.35	12.4			1.09342	1.12548		0.70019
F	16.61	13.5			1.13033	1.22037		0.6751
F	10.8	11.5			1.0607	1.03342		0.710118
F	11.8	11.9			1.07555	1.07188		0.700231
F	10.6	11.4			1.0569	1.02531		0.71547
F	9.05	10.8			1.03342	0.956649		0.718418
F	8.75	10.8			1.03342	0.942008		0.694603
F	5.92	8.9			0.94939	0.772322		0.839753
F	6.57	10			1	0.817565		0.657
F	6.31	10			1	0.800029		0.631
F	4.42	8.5			0.929419	0.645422		0.719723
F	5.45	9			0.954243	0.736397		0.747599
F	3.96	8			0.90309	0.597695		0.773438
M	8.6	11			1.04139	0.934498		0.646131
M	10.4	11.3			1.05308	1.01703		0.720772
M	6.2	9			0.954243	0.792392		0.85048
M	5.5	8.6			0.934498	0.740363		0.864704
M	8.5	10.4			1.01703	0.929419		0.755647
M	11.2	11			1.04139	1.04922		0.841473
M	16.5	13.6			1.13354	1.21748		0.655945
M	8.4	10.9			1.03743	0.924279		0.648634
M	10	11			1.04139	1		0.751315
M	6	8.9			0.94939	0.778151		0.851101
M	5.4	8.5			0.929419	0.732394		0.8793
M	8.5	10.4			1.01703	0.929419		0.755647
M	12	11.6			1.06446	1.07918		0.768789
M	3.6	7.4			0.869232	0.556303		0.888398
M	4.9	8.2			0.913814	0.690196		0.888699
M	6.4	9.8			0.991226	0.80618		0.679989
M	4.7	8.2			0.913814	0.672098		0.852425
M	8.5	10.4			1.01703	0.929419		0.755647
M	9.7	11.2			1.04922	0.986772		0.690427
M	14.6	12.7			1.1038	1.16435		0.712757
M	34	16.2			1.20952	1.53148		0.799712
M	60	17.5			1.24304	1.77815		1.11953
M	9.1	10.2			1.0086	0.959041		0.857513
M	6.2	9			0.954243	0.792392		0.85048
M	10.8	11.5			1.0607	1.03342		0.710118
M	10	11.1			1.04532	1		0.731191
M	12.7	12.3			1.08991	1.1038		0.682478
M	11.5	11.7			1.06819	1.0607		0.718026
M	8.5	9.9			0.995635	0.929419		0.876019
M	6.5	9			0.954243	0.812913		0.891632
M	12.7	12.3			1.08991	1.1038		0.682478
M	11.5	11.7			1.06819	1.0607		0.718026
M	9.4	10.9			1.03743	0.973128		0.725852
M	9	10.2			1.0086	0.954243		0.84809
M	10.4	11.4			1.0569	1.01703		0.70197
M	11	11.4			1.0569	1.04139		0.742469
M	12.4	11.8			1.07188	1.09342		0.754702
M	6.6	9.1			0.959041	0.819544		0.87583
M	8.6	10.6			1.02531	0.934498		0.722073
M	5.5	8.6			0.934498	0.740363		0.864704
M	8.5	10.4			1.01703	0.929419		0.755647
M	9.7	11.2			1.04922	0.986772		0.690427
M	15.2	13			1.11394	1.18184		0.691853
M	34	16.2			1.20952	1.53148		0.799712
M	60	17.5			1.24304	1.77815		1.11953
M	9.4	11.4			1.0569	0.973128		0.634473
M	6.7	9.6			0.982271	0.826075		0.757288
M	10.8	11.5			1.0607	1.03342		0.710118
M	5.2	9.5			0.977724	0.716003		0.606502
M	12.7	12.3			1.08991	1.1038		0.682478
M	11.5	11.7			1.06819	1.0607		0.718026
M	8.5	9.9			0.995635	0.929419		0.876019
M	6.5	9			0.954243	0.812913		0.891632
M	12.7	12.3			1.08991	1.1038		0.682478
M	11.5	11.7			1.06819	1.0607		0.718026
M	9.4	10.9			1.03743	0.973128		0.725852
M	9.4	10.8			1.03342	0.973128		0.746202
M	10.4	11.4			1.0569	1.01703		0.70197
M	11	11.4			1.0569	1.04139		0.742469
M	6.5	10			1	0.812913		0.65
M	6.8	10.6			1.02531	0.832509		0.570941
M	8.81	10.9			1.03743	0.944976		0.680294
M	12.3	11.6			1.06446	1.08991		0.788009
M	8.7	11.1			1.04532	0.939519		0.636137
M	5.1	8.8			0.944483	0.70757		0.74838
M	6.5	10			1	0.812913		0.65
M	5.5	8.6			0.934498	0.740363		0.864704
M	8.5	10.4			1.01703	0.929419		0.755647
M	12	11.6			1.06446	1.07918		0.768789
M	16.5	13.6			1.13354	1.21748		0.655945
M	8.6	11.1			1.04532	0.934498		0.628825
M	10.8	11.5			1.0607	1.03342		0.710118
M	6.5	9			0.954243	0.812913		0.891632
M	5.7	9.6			0.982271	0.755875		0.64426
M	8.5	10.4			1.01703	0.929419		0.755647
M	12	11.6			1.06446	1.07918		0.768789
M	3.9	8.6			0.934498	0.591065		0.613154
M	5.2	8.8			0.944483	0.716003		0.763054
M	6.6	10			1	0.819544		0.66
M	12.3	11.6			1.06446	1.08991		0.788009
M	8.72	11.1			1.04532	0.940516		0.637599
M	10.85	11.5			1.0607	1.03543		0.713405
M	6.53	10			1	0.814913		0.653
M	5.5	8.6			0.934498	0.740363		0.864704
M	8.5	10.4			1.01703	0.929419		0.755647
M	12	11.6			1.06446	1.07918		0.768789
M	16.5	13.6			1.13354	1.21748		0.655945
M	8.62	11.1			1.04532	0.935507		0.630287
M	10.27	11.2			1.04922	1.01157		0.730998
M	6.5	9			0.954243	0.812913		0.891632
M	5.73	9.6			0.982271	0.758155		0.647651
M	8.5	10.4			1.01703	0.929419		0.755647
M	12	11.6			1.06446	1.07918		0.768789
M	3.95	8.6			0.934498	0.596597		0.621015
M	5.12	8.8			0.944483	0.70927		0.751315
M	6.61	10			1	0.820201		0.661
M	5.15	9.5			0.977724	0.711807		0.600671
M	6.53	10			1	0.814913		0.653
M	5.15	8.8			0.944483	0.711807		0.755717
M	15.61	13.7			1.13672	1.1934		0.607073
M	10.8	11.5			1.0607	1.03342		0.710118
M	6.56	9.8			0.991226	0.816904		0.696988
M	8.62	11.1			1.04532	0.935507		0.630287
M	8.72	11.1			1.04532	0.940516		0.637599
M	10.85	11.5			1.0607	1.03543		0.713405
M	9.7	11.2			1.04922	0.986772		0.690427
M	15.2	13			1.11394	1.18184		0.691853
M	5.15	8.8			0.944483	0.711807		0.755717
M	15.61	13.7			1.13672	1.1934		0.607073
M	10.8	11.5			1.0607	1.03342		0.710118
M	10.32	11.4			1.0569	1.01368		0.696571
M	11	11.4			1.0569	1.04139		0.742469
M	4	7.7			0.886491	0.60206		0.876169
M	4.32	7.6			0.880814	0.635484		0.984108
M	9.6	11.5			1.0607	0.982271		0.631216
M	12.7	12.3			1.08991	1.1038		0.682478
M	11.5	11.7			1.06819	1.0607		0.718026
M	10.7	11.5			1.0607	1.02938		0.703542
M	8.75	11			1.04139	0.942008		0.6574
M	7.2	10.3			1.01284	0.857332		0.658902
M	15.45	13			1.11394	1.18893		0.703232
M	14.75	13.5			1.13033	1.16879		0.599502
M	5.77	9.7			0.986772	0.761176		0.632209
M	14.52	13.2			1.12057	1.16197		0.631313
M	8.84	11.3			1.05308	0.946452		0.612656
M	5.5	8.6			0.934498	0.740363		0.864704
M	8.5	10.4			1.01703	0.929419		0.755647
M	12	11.6			1.06446	1.07918		0.768789
M	14.5	12.2			1.08636	1.16137		0.798525
M	6.5	9.6			0.982271	0.812913		0.734682
M	10.6	11.5			1.0607	1.02531		0.696967
M	9	11			1.04139	0.954243		0.676183
M	12.92	12.1			1.08279	1.11126		0.7293
M	6.47	9.9			0.995635	0.810904		0.666805
M	6.56	9.8			0.991226	0.816904		0.696988
M	8.62	11.1			1.04532	0.935507		0.630287
M	8.72	11.1			1.04532	0.940516		0.637599
M	10.85	11.5			1.0607	1.03543		0.713405
M	3.95	7.6			0.880814	0.596597		0.899821
M	4.3	7.8			0.892095	0.633468		0.906118
M	9.06	11			1.04139	0.957128		0.680691
M	8.32	10.8			1.03342	0.920123		0.660468
M	6.75	10.6			1.02531	0.829304		0.566743
M	8.81	10.9			1.03743	0.944976		0.680294
M	8.08	10.3			1.01284	0.907411		0.739434
M	8.58	11.4			1.0569	0.933487		0.579126
M	5.3	9.2			0.963788	0.724276		0.680632
M	6.61	10			1	0.820201		0.661
M	5.15	9.5			0.977724	0.711807		0.600671
M	6.53	10			1	0.814913		0.653
M	5.73	9.6			0.982271	0.758155		0.647651
M	8.9	11			1.04139	0.94939		0.66867
M	8	10.2			1.0086	0.90309		0.753858
M	9.1	10.9			1.03743	0.959041		0.702687
M	9.4	11.4			1.0569	0.973128		0.634473
M	6.65	9.6			0.982271	0.822822		0.751637
M	10.35	11.3			1.05308	1.01494		0.717307
M	10.9	11.9			1.07555	1.03743		0.646823
M	8	11.1			1.04532	0.90309		0.584953
M	11.65	11.7			1.06819	1.06633		0.727392
M	8.1	10.6			1.02531	0.908485		0.680092
M	15.65	13.7			1.13672	1.19451		0.608629
M	9.7	11.2			1.04922	0.986772		0.690427
M	10.3	11.4			1.0569	1.01284		0.695221
M	11	11.4			1.0569	1.04139		0.742469
M	10.2	11.2			1.04922	1.0086		0.726016
M	7.62	10.4			1.01703	0.881955		0.677415
M	9.6	11.5			1.0607	0.982271		0.631216
M	10.85	11.5			1.0607	1.03543		0.713405
M	5.12	8.8			0.944483	0.70927		0.751315
M	7.2	10.3			1.01284	0.857332		0.658902
M	5.65	9.1			0.959041	0.752048		0.749763
M	7.2	10.2			1.0086	0.857332		0.678472
M	5.65	9			0.954243	0.752048		0.775034
M	7.7	10.5			1.02119	0.886491		0.665155
M	7.8	10.4			1.01703	0.892095		0.693417
M	5.5	9			0.954243	0.740363		0.754458
M	3.95	7.6			0.880814	0.596597		0.899821
M	4.3	7.8			0.892095	0.633468		0.906118
M	9.06	11			1.04139	0.957128		0.680691
M	8.32	10.8			1.03342	0.920123		0.660468
M	6.75	10.6			1.02531	0.829304		0.566743
M	8.81	10.9			1.03743	0.944976		0.680294
M	8.08	10.3			1.01284	0.907411		0.739434
M	9.4	10.9			1.03743	0.973128		0.725852
M	9.35	11.4			1.0569	0.970812		0.631098
M	6.65	9.6			0.982271	0.822822		0.751637
M	8.5	10.4			1.01703	0.929419		0.755647
M	12	11.6			1.06446	1.07918		0.768789
M	16.6	13.7			1.13672	1.22011		0.645575
M	8.6	10.6			1.02531	0.934498		0.722073
M	60	17.5			1.24304	1.77815		1.11953
M	9.4	11.4			1.0569	0.973128		0.634473
M	6.7	9.6			0.982271	0.826075		0.757288
M	10.8	11.5			1.0607	1.03342		0.710118
M	5.2	9.5			0.977724	0.716003		0.606502
M	12.7	12.3			1.08991	1.1038		0.682478
M	11.5	11.7			1.06819	1.0607		0.718026
M	8.5	9.9			0.995635	0.929419		0.876019
M	6.8	9.1			0.959041	0.832509		0.90237
M	12.7	12.3			1.08991	1.1038		0.682478
M	11.5	11.7			1.06819	1.0607		0.718026
M	9.6	11.1			1.04532	0.982271		0.701944
M	9.4	10.8			1.03342	0.973128		0.746202
M	10.4	11.4			1.0569	1.01703		0.70197
M	11	11.4			1.0569	1.04139		0.742469
M	6.6	10.1			1.00432	0.819544		0.640589
M	6.8	10.6			1.02531	0.832509		0.570941
M	6.5	10			1	0.812913		0.65
M	12.3	11.6			1.06446	1.08991		0.788009
M	8.4	10.8			1.03342	0.924279		0.666819
M	4.9	8.4			0.924279	0.690196		0.82672
M	9.7	11.2			1.04922	0.986772		0.690427
M	15.2	13			1.11394	1.18184		0.691853
M	5.15	8.8			0.944483	0.711807		0.755717
M	15.61	13.7			1.13672	1.1934		0.607073
M	10.8	11.5			1.0607	1.03342		0.710118
M	10.32	11.4			1.0569	1.01368		0.696571
M	11	11.4			1.0569	1.04139		0.742469
M	4	7.7			0.886491	0.60206		0.876169
M	4.32	7.6			0.880814	0.635484		0.984108
M	9.6	11.5			1.0607	0.982271		0.631216
M	12.7	12.3			1.08991	1.1038		0.682478
M	11.5	11.7			1.06819	1.0607		0.718026
M	10.7	11.5			1.0607	1.02938		0.703542
M	8.75	11			1.04139	0.942008		0.6574
M	7.2	10.3			1.01284	0.857332		0.658902
M	16.5	13.6			1.13354	1.21748		0.655945
M	8.62	11.1			1.04532	0.935507		0.630287
M	10.27	11.2			1.04922	1.01157		0.730998
M	5.3	9.2			0.963788	0.724276		0.680632
M	6.61	10			1	0.820201		0.661
M	5.15	9.5			0.977724	0.711807		0.600671
M	6.53	10			1	0.814913		0.653
M	5.73	9.6			0.982271	0.758155		0.647651
M	7.1	10.5			1.02119	0.851258		0.613325
M	4.52	9.2			0.963788	0.655138		0.580464
M	4.4	9.1			0.959041	0.643453		0.583887
M	11.65	12.2			1.08636	1.06633		0.641574
M	8.65	11.4			1.0569	0.937016		0.58385
M	2.43	7.3			0.863323	0.385606		0.624651
M	4.72	9			0.954243	0.673942		0.647462
M	3.95	8.6			0.934498	0.596597		0.621015
M	3.95	8.6			0.934498	0.596597		0.621015
M	16.45	13.6			1.13354	1.21617		0.653957
M	9.95	12			1.07918	0.997823		0.57581
M	5.45	9.6			0.982271	0.736397		0.616003
M	7.1	10.7			1.02938	0.851258		0.579571
M	4.85	9.6			0.982271	0.685742		0.548186
M	5.32	9.4			0.973128	0.725912		0.640513
M	11.88	12.3			1.08991	1.07482		0.638412
M	14.53	13.6			1.13354	1.16227		0.577629
M	13.74	13.1			1.11727	1.13799		0.611185
M	20.03	14.7			1.16732	1.30168		0.630564
M	11.59	12.4			1.09342	1.06408		0.607881
M	12.29	13.3			1.12385	1.08955		0.522393
M	13.95	13.6			1.13354	1.14457		0.554571
M	5.43	9.4			0.973128	0.7348		0.653757
M	4.85	9.6			0.982271	0.685742		0.548186
M	5.23	9.4			0.973128	0.718502		0.629677
M	9.15	11.2			1.04922	0.961421		0.651279
M	10.5	12			1.07918	1.02119		0.607639
M	11.6	12.3			1.08991	1.06446		0.623365
M	7.22	10.9			1.03743	0.858537		0.557516
M	7.1	10.5			1.02119	0.851258		0.613325
M	4.52	9.2			0.963788	0.655138		0.580464
M	4.4	9.1			0.959041	0.643453		0.583887
M	11.65	12.2			1.08636	1.06633		0.641574
M	8.65	11.4			1.0569	0.937016		0.58385
M	21.5	15.4			1.18752	1.33244		0.588676
M	4.72	9			0.954243	0.673942		0.647462
M	3.95	8.6			0.934498	0.596597		0.621015
M	16.45	13.6			1.13354	1.21617		0.653957
M	9.95	12			1.07918	0.997823		0.57581
M	5.45	9.6			0.982271	0.736397		0.616003
M	7.1	10.7			1.02938	0.851258		0.579571
M	4.85	9.6			0.982271	0.685742		0.548186
M	5.32	9.4			0.973128	0.725912		0.640513
M	2.4	7.3			0.863323	0.380211		0.61694
M	5.3	9.2			0.963788	0.724276		0.680632
M	5.15	9.5			0.977724	0.711807		0.600671
M	6.53	10			1	0.814913		0.653
M	5.76	9.5			0.977724	0.760422		0.671818
M	5.8	9.9			0.995635	0.763428		0.597754
M	4.5	9.3			0.968483	0.653213		0.559453
F	13	13.2			1.12057	1.11394		0.565225
F	4.56	9.6			0.982271	0.658965		0.515408
F	10.3	11.9			1.07555	1.01284		0.611218
F	5.1	9.3			0.968483	0.70757		0.634047
F	7.1	10.5			1.02119	0.851258		0.613325
F	7.31	10.4			1.01703	0.863917		0.649856
F	8	10.7			1.02938	0.90309		0.653038
F	6.5	9.9			0.995635	0.812913		0.669897
F	6.35	9.7			0.986772	0.802774		0.695759
F	12.72	13			1.11394	1.10449		0.578971
F	4.75	9.4			0.973128	0.676694		0.571887
F	6.3	10			1	0.799341		0.63
F	7.9	10.6			1.02531	0.897627		0.663299
F	3.75	8.1			0.908485	0.574031		0.705629
F	8.4	10.9			1.03743	0.924279		0.648634
F	11.42	12			1.07918	1.05767		0.66088
F	9.6	11.2			1.04922	0.982271		0.683309
F	10.5	11.7			1.06819	1.02119		0.655589
F	7	10.2			1.0086	0.845098		0.659626
F	8.15	10.7			1.02938	0.911158		0.665283
M	8.9	11			1.04139	0.94939		0.66867
M	8	10.2			1.0086	0.90309		0.753858
M	9.1	10.9			1.03743	0.959041		0.702687
M	9.4	11.4			1.0569	0.973128		0.634473
M	6.65	9.6			0.982271	0.822822		0.751637
M	10.35	11.3			1.05308	1.01494		0.717307
M	10.9	11.9			1.07555	1.03743		0.646823
M	8	11.1			1.04532	0.90309		0.584953
M	11.65	11.7			1.06819	1.06633		0.727392
M	8.1	10.6			1.02531	0.908485		0.680092
M	15.65	13.7			1.13672	1.19451		0.608629
M	9.7	11.2			1.04922	0.986772		0.690427
M	10.3	11.4			1.0569	1.01284		0.695221
M	11	11.4			1.0569	1.04139		0.742469
M	10.2	11.2			1.04922	1.0086		0.726016
M	7.62	10.4			1.01703	0.881955		0.677415
M	9.6	11.5			1.0607	0.982271		0.631216
M	10.85	11.5			1.0607	1.03543		0.713405
M	5.12	8.8			0.944483	0.70927		0.751315
M	7.2	10.3			1.01284	0.857332		0.658902
M	5.65	9.1			0.959041	0.752048		0.749763
M	7.2	10.2			1.0086	0.857332		0.678472
M	5.65	9			0.954243	0.752048		0.775034
M	7.7	10.5			1.02119	0.886491		0.665155
M	7.8	10.4			1.01703	0.892095		0.693417
M	5.5	9			0.954243	0.740363		0.754458
M	3.95	7.6			0.880814	0.596597		0.899821
M	4.3	7.8			0.892095	0.633468		0.906118
M	9.06	11			1.04139	0.957128		0.680691
M	8.32	10.8			1.03342	0.920123		0.660468
M	6.75	10.6			1.02531	0.829304		0.566743
M	8.81	10.9			1.03743	0.944976		0.680294
M	8.08	10.3			1.01284	0.907411		0.739434
M	9.4	10.9			1.03743	0.973128		0.725852
M	9.35	11.4			1.0569	0.970812		0.631098
M	6.65	9.6			0.982271	0.822822		0.751637
F	13.25	12.2			1.08636	1.12222		0.729687
F	13.35	12.4			1.09342	1.12548		0.70019
F	16.5	13.5			1.13033	1.21748		0.670629
F	10.8	11.5			1.0607	1.03342		0.710118
F	11.8	11.9			1.07555	1.07188		0.700231
F	10.6	11.4			1.0569	1.02531		0.71547
F	5.92	8.9			0.94939	0.772322		0.839753
F	6.57	10			1	0.817565		0.657
F	6.31	10			1	0.800029		0.631
F	4.42	8.5			0.929419	0.645422		0.719723
F	5.45	9			0.954243	0.736397		0.747599
F	3.96	8			0.90309	0.597695		0.773438
F	12.52	11.6			1.06446	1.0976		0.802103
F	8.82	10.5			1.02119	0.945469		0.761905
F	14	12.6			1.10037	1.14613		0.699868
F	15.5	13.1			1.11727	1.19033		0.689474
F	20	14			1.14613	1.30103		0.728863
F	10.6	11.6			1.06446	1.02531		0.679097
F	15.8	12.7			1.1038	1.19866		0.77134
F	19.6	13.6			1.13354	1.29226		0.779183
F	18.6	13.9			1.14301	1.26951		0.692578
F	14.5	12.7			1.1038	1.16137		0.707875
F	9.54	11.2			1.04922	0.979548		0.679038
F	10.64	11.6			1.06446	1.02694		0.68166
F	9.2	10.8			1.03342	0.963788		0.730326
M	5.5	8.6			0.934498	0.740363		0.864704
M	8.5	10.4			1.01703	0.929419		0.755647
M	9.7	11.2			1.04922	0.986772		0.690427
M	15.2	13			1.11394	1.18184		0.691853
M	34	16.2			1.20952	1.53148		0.799712
M	60	17.5			1.24304	1.77815		1.11953
M	9.35	11.4			1.0569	0.970812		0.631098
M	6.65	9.6			0.982271	0.822822		0.751637
M	10.8	11.5			1.0607	1.03342		0.710118
M	10.32	11.4			1.0569	1.01368		0.696571
M	12.7	12.3			1.08991	1.1038		0.682478
M	11.5	11.7			1.06819	1.0607		0.718026
M	8.5	9.9			0.995635	0.929419		0.876019
M	6.5	9			0.954243	0.812913		0.891632
M	12.7	12.3			1.08991	1.1038		0.682478
M	11.5	11.7			1.06819	1.0607		0.718026
M	9.4	10.9			1.03743	0.973128		0.725852
M	9.35	10.8			1.03342	0.970812		0.742233
M	10.4	11.4			1.0569	1.01703		0.70197
M	11	11.4			1.0569	1.04139		0.742469
M	12.85	12			1.07918	1.1089		0.743634
M	6.75	10.6			1.02531	0.829304		0.566743
M	8.81	10.9			1.03743	0.944976		0.680294
F	16.2	12.7			1.1038	1.20952		0.790868
F	13.2	12.2			1.08636	1.12057		0.726933
F	14	12.6			1.10037	1.14613		0.699868
F	15.5	13.1			1.11727	1.19033		0.689474
F	20	14			1.14613	1.30103		0.728863
F	10.6	11.6			1.06446	1.02531		0.679097
F	16.2	12.7			1.1038	1.20952		0.790868
F	19.6	13.6			1.13354	1.29226		0.779183
F	16.5	13.5			1.13033	1.21748		0.670629
F	10.8	11.5			1.0607	1.03342		0.710118
F	18.6	13.9			1.14301	1.26951		0.692578
F	9.2	10.8			1.03342	0.963788		0.730326
F	16.2	12.7			1.1038	1.20952		0.790868
F	13.2	12.2			1.08636	1.12057		0.726933
F	18.6	13.9			1.14301	1.26951		0.692578
F	9.2	10.8			1.03342	0.963788		0.730326
F	6.65	10			1	0.822822		0.665
F	6.3	10			1	0.799341		0.63
F	14.2	12			1.07918	1.15229		0.821759
F	15.5	13.1			1.11727	1.19033		0.689474
F	9.6	11.2			1.04922	0.982271		0.683309
F	10.5	11.7			1.06819	1.02119		0.655589
M	16.3	14			1.14613	1.21219		0.594023
M	9.2	11.5			1.0607	0.963788		0.604915
M	10.3	11.5			1.0607	1.01284		0.677242
M	15.05	13			1.11394	1.17754		0.685025
M	34	16.2			1.20952	1.53148		0.799712
M	60	17.5			1.24304	1.77815		1.11953
M	12.5	11.5			1.0607	1.09691		0.821895
M	7	10.1			1.00432	0.845098		0.679413
M	8.5	9.9			0.995635	0.929419		0.876019
M	6.5	9			0.954243	0.812913		0.891632
M	5.5	8.6			0.934498	0.740363		0.864704
M	8.5	10.4			1.01703	0.929419		0.755647
M	12	11.6			1.06446	1.07918		0.768789
M	14.5	12.2			1.08636	1.16137		0.798525
M	6.5	9.6			0.982271	0.812913		0.734682
M	10.6	11.5			1.0607	1.02531		0.696967
M	9	11			1.04139	0.954243		0.676183
M	12.85	12			1.07918	1.1089		0.743634
M	6.75	10.6			1.02531	0.829304		0.566743
M	8.81	10.9			1.03743	0.944976		0.680294
M	7.8	10.4			1.01703	0.892095		0.693417
M	9.4	10.9			1.03743	0.973128		0.725852
M	17.28	14			1.14613	1.23754		0.629738
M	16.31	14			1.14613	1.21245		0.594388
M	12.95	12.2			1.08636	1.11227		0.713165
M	12.21	12.6			1.10037	1.08672		0.610385
M	15	13			1.11394	1.17609		0.682749
M	11.88	12.3			1.08991	1.07482		0.638412
M	14.53	13.6			1.13354	1.16227		0.577629
M	13.74	13.1			1.11727	1.13799		0.611185
M	20.03	14.7			1.16732	1.30168		0.630564
M	11.59	12.4			1.09342	1.06408		0.607881
M	12.29	13.3			1.12385	1.08955		0.522393
M	6.5	10			1	0.812913		0.65
M	5.75	9.6			0.982271	0.759668		0.649911
M	7.1	10.5			1.02119	0.851258		0.613325
M	4.52	9.2			0.963788	0.655138		0.580464
M	4.4	9.1			0.959041	0.643453		0.583887
M	11.65	12.2			1.08636	1.06633		0.641574
M	8.65	11.4			1.0569	0.937016		0.58385
M	21.5	15.4			1.18752	1.33244		0.588676
M	4.72	9			0.954243	0.673942		0.647462
M	3.95	8.6			0.934498	0.596597		0.621015
M	16.45	13.6			1.13354	1.21617		0.653957
M	9.95	12			1.07918	0.997823		0.57581
M	9.04	11.2			1.04922	0.956168		0.643449
M	10.5	12			1.07918	1.02119		0.607639
M	11.54	12.2			1.08636	1.06221		0.635516
M	7.22	10.9			1.03743	0.858537		0.557516
M	7.1	10.7			1.02938	0.851258		0.579571
M	5.43	9.4			0.973128	0.7348		0.653757
M	4.85	9.6			0.982271	0.685742		0.548186
M	5.23	9.4			0.973128	0.718502		0.629677
M	2.43	7.3			0.863323	0.385606		0.624651
M	11.59	12.4			1.09342	1.06408		0.607881
M	12.29	13.3			1.12385	1.08955		0.522393
M	13.95	13.6			1.13354	1.14457		0.554571
M	5.43	9.4			0.973128	0.7348		0.653757
M	10.99	12.4			1.09342	1.041		0.576412
M	7.73	10.6			1.02531	0.888179		0.649026
M	7.1	10.5			1.02119	0.851258		0.613325
M	4.52	9.2			0.963788	0.655138		0.580464
M	21	15.4			1.18752	1.32222		0.574986
M	4.72	9			0.954243	0.673942		0.647462
M	3.95	8.6			0.934498	0.596597		0.621015
M	16.6	13.6			1.13354	1.22011		0.65992
M	9.95	12			1.07918	0.997823		0.57581
M	9.04	11.2			1.04922	0.956168		0.643449
M	10.5	12			1.07918	1.02119		0.607639
M	12	12.5			1.09691	1.07918		0.6144
M	7.22	10.9			1.03743	0.858537		0.557516
M	6.96	10.5			1.02119	0.842609		0.601231
M	4.44	8.9			0.94939	0.647383		0.629815
M	4.59	9.1			0.959041	0.661813		0.6091
M	11.5	12.2			1.08636	1.0607		0.633313
M	8.6	11.4			1.0569	0.934498		0.580476
M	5.3	9.2			0.963788	0.724276		0.680632
M	4.52	9.2			0.963788	0.655138		0.580464
M	4.4	9.1			0.959041	0.643453		0.583887
M	11.65	12.2			1.08636	1.06633		0.641574
M	8.65	11.4			1.0569	0.937016		0.58385
M	5.8	9.9			0.995635	0.763428		0.597754
M	4.5	9.3			0.968483	0.653213		0.559453
M	5.45	9.6			0.982271	0.736397		0.616003
M	7.1	10.7			1.02938	0.851258		0.579571
M	5.3	9.4			0.973128	0.724276		0.638105
M	4.85	9.6			0.982271	0.685742		0.548186
M	5.2	9.4			0.973128	0.716003		0.626066
M	2.4	7.3			0.863323	0.380211		0.61694
M	15.74	12.6			1.10037	1.197		0.786852
M	13.96	12.7			1.1038	1.14489		0.681513
M	10.72	11.41			1.05729	1.03019		0.721669
M	13.37	12.3			1.08991	1.12613		0.718482
M	8.33	10.1			1.00432	0.920645		0.808502
M	5.34	8.9			0.94939	0.727541		0.75748
M	9.76	11.2			1.04922	0.98945		0.694698
M	14.35	12.5			1.09691	1.15685		0.73472
M	12.46	12			1.07918	1.09552		0.721065
M	11.39	11.6			1.06446	1.05652		0.729709
M	12.3	11.6			1.06446	1.08991		0.788009
M	4.38	12.3			1.08991	0.641474		0.235374
M	13.81	12.2			1.08636	1.14019		0.760526
M	12.49	12			1.07918	1.09656		0.722801
M	6.05	9.5			0.977724	0.781755		0.705642
M	9.7	11.2			1.04922	0.986772		0.690427
M	10.3	11.4			1.0569	1.01284		0.695221
M	11	11.4			1.0569	1.04139		0.742469
M	10.2	11.2			1.04922	1.0086		0.726016
M	7.62	10.4			1.01703	0.881955		0.677415
M	9.6	11.5			1.0607	0.982271		0.631216
M	10.85	11.5			1.0607	1.03543		0.713405
M	5.12	8.8			0.944483	0.70927		0.751315
M	7.2	10.3			1.01284	0.857332		0.658902
M	5.65	9.1			0.959041	0.752048		0.749763
M	7.2	10.2			1.0086	0.857332		0.678472
M	5.65	9			0.954243	0.752048		0.775034
M	7.7	10.5			1.02119	0.886491		0.665155
M	7.8	10.4			1.01703	0.892095		0.693417
M	5.5	9			0.954243	0.740363		0.754458
M	3.95	7.6			0.880814	0.596597		0.899821
M	4.3	7.8			0.892095	0.633468		0.906118
M	3.8	6.4			0.80618	0.579784		1.44958
M	9.06	11			1.04139	0.957128		0.680691
M	8.32	10.8			1.03342	0.920123		0.660468
M	6.75	10.6			1.02531	0.829304		0.566743
M	8.81	10.9			1.03743	0.944976		0.680294
M	8.08	10.3			1.01284	0.907411		0.739434
M	9.4	10.9			1.03743	0.973128		0.725852
M	9.35	11.4			1.0569	0.970812		0.631098
M	6.65	9.6			0.982271	0.822822		0.751637
M	10.35	11.3			1.05308	1.01494		0.717307
M	10.87	11.9			1.07555	1.03623		0.645043
M	8.03	11.1			1.04532	0.904716		0.587147
M	11.68	11.7			1.06819	1.06744		0.729265
M	10.78	11.6			1.06446	1.03262		0.690629
M	8.75	11			1.04139	0.942008		0.6574
M	7.43	10.3			1.01284	0.870989		0.67995
M	16.75	13.8			1.13988	1.22401		0.637349
M	5.75	9.5			0.977724	0.759668		0.670652
M	10.27	11.2			1.04922	1.01157		0.730998
M	9.7	11.2			1.04922	0.986772		0.690427
M	15.2	13			1.11394	1.18184		0.691853
M	8.08	10.6			1.02531	0.907411		0.678412
M	15.61	13.7			1.13672	1.1934		0.607073
M	9.73	11.2			1.04922	0.988113		0.692562
M	10.32	11.4			1.0569	1.01368		0.696571
M	11	11.4			1.0569	1.04139		0.742469
M	10.2	11.2			1.04922	1.0086		0.726016
M	7.62	10.4			1.01703	0.881955		0.677415
M	9.6	11.5			1.0607	0.982271		0.631216
M	12.7	12.3			1.08991	1.1038		0.682478
M	16.15	14			1.14613	1.20817		0.588557
M	8.45	10.7			1.02938	0.926857		0.689772
M	12.92	12.1			1.08279	1.11126		0.7293
M	6.47	9.9			0.995635	0.810904		0.666805
M	6.56	9.8			0.991226	0.816904		0.696988
M	8.62	11.1			1.04532	0.935507		0.630287
M	8.72	11.1			1.04532	0.940516		0.637599
M	10.85	11.5			1.0607	1.03543		0.713405
M	5.12	8.8			0.944483	0.70927		0.751315
M	7.18	10.3			1.01284	0.856124		0.657072
M	5.62	9.1			0.959041	0.749736		0.745782
M	7.67	10.5			1.02119	0.884795		0.662563
M	7.72	10.4			1.01703	0.887617		0.686305
M	5.24	9			0.954243	0.719331		0.718793
M	3.92	7.7			0.886491	0.593286		0.858645
M	4.22	7.6			0.880814	0.625312		0.961328
M	8.5	10.4			1.01703	0.929419		0.755647
M	12	11.6			1.06446	1.07918		0.768789
M	3.6	7.4			0.869232	0.556303		0.888398
M	4.9	8.2			0.913814	0.690196		0.888699
M	6.4	9.8			0.991226	0.80618		0.679989
M	4.7	8.2			0.913814	0.672098		0.852425
M	11.2	11			1.04139	1.04922		0.841473
M	16.5	13.6			1.13354	1.21748		0.655945
M	8.4	10.9			1.03743	0.924279		0.648634
M	10	11			1.04139	1		0.751315
M	6	8.9			0.94939	0.778151		0.851101
M	5.4	8.5			0.929419	0.732394		0.8793
M	9.4	10.9			1.03743	0.973128		0.725852
M	9	10.2			1.0086	0.954243		0.84809
M	10.4	11.4			1.0569	1.01703		0.70197
M	11	11.4			1.0569	1.04139		0.742469
M	12.4	11.8			1.07188	1.09342		0.754702
M	6.6	9.1			0.959041	0.819544		0.87583
M	8.6	10.6			1.02531	0.934498		0.722073
M	9.7	11.2			1.04922	0.986772		0.690427
M	14.6	12.7			1.1038	1.16435		0.712757
M	34	16.2			1.20952	1.53148		0.799712
M	60	17.5			1.24304	1.77815		1.11953
M	9.1	10.2			1.0086	0.959041		0.857513
M	6.2	9			0.954243	0.792392		0.85048
M	10.8	11.5			1.0607	1.03342		0.710118
M	10	11.1			1.04532	1		0.731191
M	12.7	12.3			1.08991	1.1038		0.682478
M	11.5	11.7			1.06819	1.0607		0.718026
M	8.5	9.9			0.995635	0.929419		0.876019
M	6.5	9			0.954243	0.812913		0.891632
M	12.7	12.3			1.08991	1.1038		0.682478
M	11.5	11.7			1.06819	1.0607		0.718026
M	34	16.2			1.20952	1.53148		0.799712
M	60	17.5			1.24304	1.77815		1.11953
M	12.5	11.5			1.0607	1.09691		0.821895
M	7	10.1			1.00432	0.845098		0.679413
M	8.5	9.9			0.995635	0.929419		0.876019
M	6.5	9			0.954243	0.812913		0.891632
M	5.5	8.6			0.934498	0.740363		0.864704
M	8.5	10.4			1.01703	0.929419		0.755647
M	12	11.6			1.06446	1.07918		0.768789
M	14.5	12.2			1.08636	1.16137		0.798525
M	6.5	9.6			0.982271	0.812913		0.734682
M	10.6	11.5			1.0607	1.02531		0.696967
M	9	11			1.04139	0.954243		0.676183
M	12.85	12			1.07918	1.1089		0.743634
M	6.75	10.6			1.02531	0.829304		0.566743
M	8.81	10.9			1.03743	0.944976		0.680294
M	7.8	10.4			1.01703	0.892095		0.693417
M	9.4	10.9			1.03743	0.973128		0.725852
M	9.35	11.4			1.0569	0.970812		0.631098
M	6.65	9.6			0.982271	0.822822		0.751637
M	16.15	14			1.14613	1.20817		0.588557
M	16.3	14			1.14613	1.21219		0.594023
M	9.2	11.5			1.0607	0.963788		0.604915
M	10.3	11.5			1.0607	1.01284		0.677242
M	15.05	13			1.11394	1.17754		0.685025
M	17.28	14			1.14613	1.23754		0.629738
M	16.31	14			1.14613	1.21245		0.594388
M	12.95	12.2			1.08636	1.11227		0.713165
M	12.21	12.6			1.10037	1.08672		0.610385
M	15.45	13			1.11394	1.18893		0.703232
M	14.75	13.5			1.13033	1.16879		0.599502
M	5.77	9.7			0.986772	0.761176		0.632209
M	14.52	13.2			1.12057	1.16197		0.631313
M	8.84	11.3			1.05308	0.946452		0.612656
M	6.56	9.8			0.991226	0.816904		0.696988
M	8.62	11.1			1.04532	0.935507		0.630287
M	8.72	11.1			1.04532	0.940516		0.637599
M	10.85	11.5			1.0607	1.03543		0.713405
M	5.12	8.8			0.944483	0.70927		0.751315
M	5.5	8.6			0.934498	0.740363		0.864704
M	8.5	10.4			1.01703	0.929419		0.755647
M	12	11.6			1.06446	1.07918		0.768789
M	14.5	12.2			1.08636	1.16137		0.798525
M	6.5	9.6			0.982271	0.812913		0.734682
F	32.92	17.6			1.24551	1.51746		0.60384
F	25.38	16			1.20412	1.40449		0.619629
F	16.29	14			1.14613	1.21192		0.593659
F	15.58	13.7			1.13672	1.19257		0.605907
F	18.99	14.5			1.16137	1.27852		0.622904
F	20	14.5			1.16137	1.30103		0.656033
F	15.31	13.4			1.1271	1.18498		0.636298
F	18.39	14.5			1.16137	1.26458		0.603223
F	14.3	13.3			1.12385	1.15534		0.607829
F	13.98	12.4			1.09342	1.14551		0.733233
F	14.8	13.1			1.11727	1.17026		0.658336
F	9.33	12			1.07918	0.969882		0.539931
F	11	11.5			1.0607	1.04139		0.723268
F	11.83	12.6			1.10037	1.07298		0.591389
F	10.64	11.9			1.07555	1.02694		0.631394
F	12.27	13			1.11394	1.08884		0.558489
F	8.27	10.6			1.02531	0.917506		0.694365
F	4.57	9.5			0.977724	0.659916		0.533022
F	11.42	12			1.07918	1.05767		0.66088
F	9.6	11.2			1.04922	0.982271		0.683309
F	10.5	11.7			1.06819	1.02119		0.655589
F	7	10.2			1.0086	0.845098		0.659626
F	8.15	10.7			1.02938	0.911158		0.665283
F	9.18	10.5			1.02119	0.962843		0.793003
F	9.44	11.2			1.04922	0.974972		0.671921
F	12.13	11.7			1.06819	1.08386		0.757361
F	12.42	12.2			1.08636	1.09412		0.683978
F	5.68	9.2			0.963788	0.754348		0.729432
F	8.4	10.9			1.03743	0.924279		0.648634
F	13.25	12.2			1.08636	1.12222		0.729687
F	13.35	12.4			1.09342	1.12548		0.70019
F	16.5	13.5			1.13033	1.21748		0.670629
F	10.8	11.5			1.0607	1.03342		0.710118
F	11.8	11.9			1.07555	1.07188		0.700231
F	10.6	11.4			1.0569	1.02531		0.71547
F	12.08	12.5			1.09691	1.08207		0.618496
F	10.18	12			1.07918	1.00775		0.58912
F	5.68	9.7			0.986772	0.754348		0.622348
F	13.17	12.9			1.11059	1.11959		0.613503
F	12.12	12.7			1.1038	1.0835		0.591686
F	6.41	10.6			1.02531	0.806858		0.538196
F	12.67	13			1.11394	1.10278		0.576695
F	17	13.9			1.14301	1.23045		0.633001
F	10.1	12.2			1.08636	1.00432		0.556214
F	15.23	13.5			1.13033	1.1827		0.619011
F	18.83	14.5			1.16137	1.27485		0.617656
F	12.83	13.3			1.12385	1.10823		0.545345
F	11.42	12			1.07918	1.05767		0.66088
F	9.6	11.2			1.04922	0.982271		0.683309
F	10.5	11.7			1.06819	1.02119		0.655589
F	7	10.2			1.0086	0.845098		0.659626
F	8.15	10.7			1.02938	0.911158		0.665283
F	8.3	10.7			1.02938	0.919078		0.677527
F	12.7	13			1.11394	1.1038		0.578061
F	4.78	9.6			0.982271	0.679428		0.540274
F	10.15	11.8			1.07188	1.00647		0.61776
F	5.26	9.3			0.968483	0.720986		0.653938
F	6.84	10.5			1.02119	0.835056		0.590865
M	11.88	12.3			1.08991	1.07482		0.638412
M	14.53	13.6			1.13354	1.16227		0.577629
M	13.74	13.1			1.11727	1.13799		0.611185
M	20.03	14.7			1.16732	1.30168		0.630564
M	11.59	12.4			1.09342	1.06408		0.607881
M	12.29	13.3			1.12385	1.08955		0.522393
M	13.95	13.6			1.13354	1.14457		0.554571
M	15.18	13.7			1.13672	1.18127		0.590351
M	11.11	12.7			1.1038	1.04571		0.542379
M	17.33	14.5			1.16137	1.2388		0.568453
M	10.99	12.4			1.09342	1.041		0.576412
M	7.73	10.6			1.02531	0.888179		0.649026
M	7.1	10.5			1.02119	0.851258		0.613325
M	4.52	9.2			0.963788	0.655138		0.580464
M	4.4	9.1			0.959041	0.643453		0.583887
M	11.65	12.2			1.08636	1.06633		0.641574
M	8.65	11.4			1.0569	0.937016		0.58385
M	2.43	7.3			0.863323	0.385606		0.624651
M	4.72	9			0.954243	0.673942		0.647462
M	3.95	8.6			0.934498	0.596597		0.621015
M	16.45	13.6			1.13354	1.21617		0.653957
M	9.95	12			1.07918	0.997823		0.57581
M	9.04	11.2			1.04922	0.956168		0.643449
M	10.5	12			1.07918	1.02119		0.607639
M	11.54	12.2			1.08636	1.06221		0.635516
M	7.22	10.9			1.03743	0.858537		0.557516
M	7.1	10.7			1.02938	0.851258		0.579571
M	5.43	9.4			0.973128	0.7348		0.653757
M	4.85	9.6			0.982271	0.685742		0.548186
M	5.23	9.4			0.973128	0.718502		0.629677
M	21.18	15.2			1.18184	1.32593		0.603108
M	4.72	9			0.954243	0.673942		0.647462
M	3.95	8.6			0.934498	0.596597		0.621015
M	16.45	13.6			1.13354	1.21617		0.653957
M	9.95	12			1.07918	0.997823		0.57581
M	9.04	11.2			1.04922	0.956168		0.643449
M	10.5	12			1.07918	1.02119		0.607639
M	11.54	12.2			1.08636	1.06221		0.635516
M	7.22	10.9			1.03743	0.858537		0.557516
M	6.96	10.5			1.02119	0.842609		0.601231
M	4.44	8.9			0.94939	0.647383		0.629815
M	4.59	9.1			0.959041	0.661813		0.6091
M	11.65	12.2			1.08636	1.06633		0.641574
M	8.58	11.4			1.0569	0.933487		0.579126
M	5.3	9.2			0.963788	0.724276		0.680632
M	6.61	10			1	0.820201		0.661
M	5.15	9.5			0.977724	0.711807		0.600671
M	6.53	10			1	0.814913		0.653
M	5.73	9.6			0.982271	0.758155		0.647651
M	5.8	9.9			0.995635	0.763428		0.597754
M	4.5	9.3			0.968483	0.653213		0.559453
M	5.45	9.6			0.982271	0.736397		0.616003
M	7.1	10.7			1.02938	0.851258		0.579571
M	5.43	9.4			0.973128	0.7348		0.653757
M	4.85	9.6			0.982271	0.685742		0.548186
M	5.23	9.4			0.973128	0.718502		0.629677
M	2.43	7.3			0.863323	0.385606		0.624651
M	9.06	11			1.04139	0.957128		0.680691
M	8.32	10.8			1.03342	0.920123		0.660468
M	6.75	10.6			1.02531	0.829304		0.566743
M	8.81	10.9			1.03743	0.944976		0.680294
M	8.08	10.3			1.01284	0.907411		0.739434
M	9.4	10.9			1.03743	0.973128		0.725852
M	9.35	11.4			1.0569	0.970812		0.631098
M	6.65	9.6			0.982271	0.822822		0.751637
M	10.35	11.3			1.05308	1.01494		0.717307
M	10.87	11.9			1.07555	1.03623		0.645043
M	8.03	11.1			1.04532	0.904716		0.587147
M	11.68	11.7			1.06819	1.06744		0.729265
M	10.78	11.6			1.06446	1.03262		0.690629
M	8.75	11			1.04139	0.942008		0.6574
M	7.43	10.3			1.01284	0.870989		0.67995
M	16.75	13.8			1.13988	1.22401		0.637349
M	5.75	9.5			0.977724	0.759668		0.670652
M	10.27	11.2			1.04922	1.01157		0.730998
M	9.7	11.2			1.04922	0.986772		0.690427
M	15.2	13			1.11394	1.18184		0.691853
M	8.08	10.6			1.02531	0.907411		0.678412
M	15.61	13.7			1.13672	1.1934		0.607073
M	9.73	11.2			1.04922	0.988113		0.692562
M	10.32	11.4			1.0569	1.01368		0.696571
M	11	11.4			1.0569	1.04139		0.742469
M	10.2	11.2			1.04922	1.0086		0.726016
M	7.62	10.4			1.01703	0.881955		0.677415
M	9.6	11.5			1.0607	0.982271		0.631216
M	12.7	12.3			1.08991	1.1038		0.682478
M	16.15	14			1.14613	1.20817		0.588557
M	8.45	10.7			1.02938	0.926857		0.689772
M	12.92	12.1			1.08279	1.11126		0.7293
M	6.47	9.9			0.995635	0.810904		0.666805
M	6.56	9.8			0.991226	0.816904		0.696988
M	8.62	11.1			1.04532	0.935507		0.630287
M	8.72	11.1			1.04532	0.940516		0.637599
M	10.85	11.5			1.0607	1.03543		0.713405
M	5.12	8.8			0.944483	0.70927		0.751315
M	7.18	10.3			1.01284	0.856124		0.657072
M	5.62	9.1			0.959041	0.749736		0.745782
M	7.67	10.5			1.02119	0.884795		0.662563
M	7.72	10.4			1.01703	0.887617		0.686305
M	5.24	9			0.954243	0.719331		0.718793
M	3.92	7.7			0.886491	0.593286		0.858645
M	4.22	7.6			0.880814	0.625312		0.961328
								0.688926
								1.44958
								0.235374
